# Supplementary material for: Implementation and impact of an online tool used in primary care to improve access to financial benefits for patients: a study protocol
Source: PubMed Central journal article supplement — BMJ Open. 2017 Oct 22;7(10):e015947. doi: 10.1136/bmjopen-2017-015947 (PMC5665212; doi:10.1136/bmjopen-2017-015947), 2017-10-22
Supplement: bmjopen-2017-015947.draft_revisions.pdf [file bmjopen-2017-015947.draft_revisions.pdf]

# BMJ Open

BMJ Open is committed to open peer review. As part of this commitment we make the peer review history of every article we publish publicly available.

When an article is published we post the peer reviewers' comments and the authors' responses online. We also post the versions of the paper that were used during peer review. These are the versions that the peer review comments apply to.

The versions of the paper that follow are the versions that were submitted during the peer review process. They are not the versions of record or the final published versions. They should not be cited or distributed as the published version of this manuscript.

BMJ Open is an open access journal and the full, final, typeset and author-corrected version of record of the manuscript is available on our site with no access controls, subscription charges or pay-per-view fees (<http://bmjopen.bmj.com>).

If you have any questions on BMJ Open's open peer review process please email [editorial.bmjopen@bmj.com](mailto:editorial.bmjopen@bmj.com)

# BMJ Open

## Implementation and impact of an online tool used in primary care to improve the income security of patients: A study protocol

|                                 |                                                                                                                                                                                                                                                                                                                                                                                                                                                                                                                                                                                                                                                                                                                                                                                                                                                                                                                                                                                                                                                                                                                                                                                                                                                    |
|---------------------------------|----------------------------------------------------------------------------------------------------------------------------------------------------------------------------------------------------------------------------------------------------------------------------------------------------------------------------------------------------------------------------------------------------------------------------------------------------------------------------------------------------------------------------------------------------------------------------------------------------------------------------------------------------------------------------------------------------------------------------------------------------------------------------------------------------------------------------------------------------------------------------------------------------------------------------------------------------------------------------------------------------------------------------------------------------------------------------------------------------------------------------------------------------------------------------------------------------------------------------------------------------|
| Journal:                        | <i>BMJ Open</i>                                                                                                                                                                                                                                                                                                                                                                                                                                                                                                                                                                                                                                                                                                                                                                                                                                                                                                                                                                                                                                                                                                                                                                                                                                    |
| Manuscript ID                   | bmjopen-2017-015947                                                                                                                                                                                                                                                                                                                                                                                                                                                                                                                                                                                                                                                                                                                                                                                                                                                                                                                                                                                                                                                                                                                                                                                                                                |
| Article Type:                   | Protocol                                                                                                                                                                                                                                                                                                                                                                                                                                                                                                                                                                                                                                                                                                                                                                                                                                                                                                                                                                                                                                                                                                                                                                                                                                           |
| Date Submitted by the Author:   | 13-Jan-2017                                                                                                                                                                                                                                                                                                                                                                                                                                                                                                                                                                                                                                                                                                                                                                                                                                                                                                                                                                                                                                                                                                                                                                                                                                        |
| Complete List of Authors:       | Aery , Anjana; Wellesley Institute<br>Rucchetto, Anne; St. Michael's Hospital, Centre for Urban Health Solutions, Upstream Lab<br>Singer , Alexander; University of Manitoba College of Medicine, Department of Family Medicine ; Manitoba Primary Care Research Network<br>Halas , Gayle; University of Manitoba College of Medicine, Family Medicine<br>Bloch, Gary; University of Toronto Faculty of Medicine, Family Medicine ; St. Michael's Hospital, Family and Community Medicine<br>Goel, Ritika ; University of Toronto Faculty of Medicine, Family and Community Medicine<br>Raza, Danyaal; University of Toronto Faculty of Medicine, Family and Community Medicine; St. Michael's Hospital, Family and Community Medicine<br>Upshur, Ross E.G; University of Toronto Faculty of Medicine, Family and Community Medicine<br>Bellaire, Jackie; University of Toronto Faculty of Medicine, Family and Community Medicine; South East Toronto Family Health Team<br>Katz, Alan; University of Manitoba, Community Health Sciences; University of Manitoba, Family Medicine<br>Pinto, Andrew; St. Michael's Hospital, Department of Family and Community Medicine; Upstream Lab, Centre for Urban Health Solutions, St. Michael's Hospital |
| <b>Primary Subject Heading</b>: | General practice / Family practice                                                                                                                                                                                                                                                                                                                                                                                                                                                                                                                                                                                                                                                                                                                                                                                                                                                                                                                                                                                                                                                                                                                                                                                                                 |
| Secondary Subject Heading:      | Health services research, Patient-centred medicine, Medical management, Public health                                                                                                                                                                                                                                                                                                                                                                                                                                                                                                                                                                                                                                                                                                                                                                                                                                                                                                                                                                                                                                                                                                                                                              |
| Keywords:                       | QUALITATIVE RESEARCH, SOCIAL MEDICINE, PREVENTIVE MEDICINE, PRIMARY CARE                                                                                                                                                                                                                                                                                                                                                                                                                                                                                                                                                                                                                                                                                                                                                                                                                                                                                                                                                                                                                                                                                                                                                                           |
|                                 |                                                                                                                                                                                                                                                                                                                                                                                                                                                                                                                                                                                                                                                                                                                                                                                                                                                                                                                                                                                                                                                                                                                                                                                                                                                    |

SCHOLARONE™  
Manuscripts

## Implementation and impact of an online tool used in primary care to improve the income security of patients: A study protocol

### Author Information:

Anjana Aery<sup>1</sup>, Anne Rucchetto<sup>2</sup>, Alexander Singer<sup>3,4</sup>, Gayle Halas<sup>3</sup>, Gary Bloch<sup>5,6</sup>, Ritika Goel<sup>5,7</sup>, Danyaal Raza<sup>5,6</sup>, Ross E.G. Upshur<sup>5,8,9</sup>, Jackie Bellaire<sup>5,10</sup>, Alan Katz<sup>3,4,11</sup>, Andrew D. Pinto<sup>2,5,6,9\*</sup>

1. Wellesley Institute, Toronto, Ontario, Canada
2. The Upstream Lab, Centre for Urban Health Solutions, Li Ka Shing Knowledge Institute, St. Michael's Hospital, Toronto
3. Department of Family Medicine, Faculty of Medicine, University of Manitoba, Winnipeg
4. Manitoba Primary Care Research Network, Winnipeg
5. Department of Family and Community Medicine, Faculty of Medicine, University of Toronto, Toronto
6. Department of Family and Community Medicine, St. Michael's Hospital, Toronto
7. Central Toronto Community Health Centre, Toronto
8. Lunenfeld-Tanenbaum Research Institute, Sinai Health Systems, Toronto
9. Division of Clinical Public Health, Dalla Lana School of Public Health, University of Toronto, Toronto
10. South East Toronto Family Health Team, Toronto
11. Manitoba Centre for Health Policy, Winnipeg

Anjana Aery [anjanaaery@gmail.com](mailto:anjanaaery@gmail.com)

Anne Rucchetto [rucchettoa@smh.ca](mailto:rucchettoa@smh.ca)

Alex Singer [asinger@sbgh.mb.ca](mailto:asinger@sbgh.mb.ca)

Gayle Halas [gayle.halas@umanitoba.ca](mailto:gayle.halas@umanitoba.ca)

Gary Bloch [gary.bloch@utoronto.ca](mailto:gary.bloch@utoronto.ca)

Ritika Goel [ritikagoelto@gmail.com](mailto:ritikagoelto@gmail.com)

Danyaal Raza [razada@smh.ca](mailto:razada@smh.ca)

Ross Upshur [ross.upshur@utoronto.ca](mailto:ross.upshur@utoronto.ca)

Jackie Bellaire [jackie.bellaire@utoronto.ca](mailto:jackie.bellaire@utoronto.ca)

Alan Katz [alan\\_katz@cpe.umanitoba.ca](mailto:alan_katz@cpe.umanitoba.ca)

Andrew D. Pinto [andrew.pinto@utoronto.ca](mailto:andrew.pinto@utoronto.ca)

*\*corresponding author:*

Dr. Andrew Pinto

Mailing address: 410 Sherbourne Street, 4<sup>th</sup> floor, Toronto, Ontario, Canada M4X 1K2

Phone: 416-867-3728

Preferred email: [andrew.pinto@utoronto.ca](mailto:andrew.pinto@utoronto.ca)

**Word Count: 2,972**

## **Abstract**

### **Objectives**

Addressing the social determinants of health of patients has been identified as crucial to reducing health inequities. However, few evidence-based interventions exist. This study emerges from an ongoing collaboration between family physicians, researchers and a charitable financial literacy organization in Canada. Our objective is to answer the following questions: Is an online tool that addresses income security feasible and acceptable to clinicians? Can such a tool be integrated into regular clinic workflow? What are patient perspectives on the tool and what is the short-term impact on income?

### **Methods**

An advisory group made up of patients living on low incomes and representatives from community agencies supports this study. We will recruit three primary care sites in Toronto, Ontario and three in Winnipeg, Manitoba that serve low-income communities. We will introduce clinicians to screening for poverty and how tax filing and applying for government benefits can increase income. Following an orientation session, health providers will be encouraged to use the tool with any patient seen. The health provider and patient will complete the online tool together, generating a tailored list of benefits, along with community resources to assist with obtaining these benefits. A brief survey on this experience will be administered to patients after they complete the tool, as well as a request to contact them in one month. Those who agree to be contacted will be interviewed on whether the intervention impacted their knowledge and ability

1  
2  
3 to access benefits. We will administer an online survey to all providers and conduct provider  
4  
5 focus groups at each site at the end of study.  
6  
7  
8  
9

## 10 **Discussion**

11  
12 An online tool could help health providers in improving the income security of their patients.  
13  
14 Our findings will provide insight into the potential of electronic tools that assist providers to  
15  
16 address the social determinants of health.  
17  
18  
19  
20

## 21 **Strengths and Limitations**

- 22 • Multi-site study involving clinics in two provinces.
- 23
- 24 • Pragmatic implementation of a novel tool in the real world of busy primary care clinics.
- 25
- 26 • Mixed-methods evaluation, using several data sources to triangulate findings.
- 27
- 28 • Convenience sampling method for patients.
- 29
- 30 • A short follow-up period (4 weeks after intervention) may underestimate the impact of
- 31  
32 the novel tool.  
33  
34  
35  
36  
37  
38  
39  
40

## 41 **Trial registration:**

42  
43 Clinicaltrials.gov: [NCT02959866](https://clinicaltrials.gov/ct2/show/study/NCT02959866). Registered Nov 7, 2016. Retrospectively registered.  
44  
45  
46  
47

48 **Keywords:** social determinants of health, income, poverty, primary care, health promotion  
49  
50  
51  
52  
53  
54  
55  
56  
57  
58  
59  
60

## BACKGROUND

The social determinants of health (SDOH) have a profound impact on the health of individuals and populations. The World Health Organization defines the SDOH as “the conditions in which people are born, grow, live, work and age. These circumstances are shaped by the distribution of money, power and resources at global, national and local levels”[1]. The health sector has a vital role to play in addressing the root causes of preventable morbidity and mortality by developing and implementing interventions on SDOH. Primary care settings in particular are uniquely opportune spaces to take action[2]. Primary care providers follow patients longitudinally, are community-based and often have knowledge of the broader familial and social contexts that shape health and disease [3]. One of the most important SDOH is income security: a person’s actual, perceived and expected income [4, 5]. Income influences the presence and severity of most health conditions. People living in poverty may have difficulty paying rent [6], affording nutritious food [7], affording transportation and engaging with others socially [6–9]. Many studies have shown that economically marginalized people tend to live shorter lives, experience a greater burden of disease and disability and rate their health status as worse than the wealthy [11–16].

There are currently few, rigorously evaluated SDOH interventions that seek to improve the income security of individuals and families [17, 18]. Welfare benefits advice services within general practices in the United Kingdom have been found to increase the income of recipients, although improvements in health were not assessed in most studies[19]. More recently, several studies in the United States have demonstrated the effectiveness of clinic-based interventions at

1  
2  
3 connecting patients to community resources to address SDOH. In Boston, the Well-child Care  
4 Visit, Evaluation, Community Resources, Advocacy, Referral, Education (WE CARE) study  
5  
6  
7  
8 took place in pediatric clinics [20]. A waiting room survey screened for social needs and  
9  
10  
11 members of the health care team provided information on community resources, adding less than  
12  
13 two minutes to the visit. At one month, 20% of the intervention group parents reported  
14  
15 contacting a referred community resource versus 2.2% of parents in the control group [21]. The  
16  
17 online tool, HelpSteps [22, 23], screens for a much larger number of social needs, taking on  
18  
19 average 25 minutes to complete, with 90% of users identifying at least one social need and 96%  
20  
21 reporting they would recommend its use to a friend or peer [24]. The California iScreen  
22  
23 study[25], also tested in pediatric clinics, used the Health Leads [26] model and found that social  
24  
25 needs can be identified and providing patient supports led to improvements in parent-reported  
26  
27 child health [27]. In Canada, a paper-based clinical tool has helped train physicians and other  
28  
29 health providers to consider poverty as a health issue [28]. This tool has been adapted by the  
30  
31 College of Family Physicians of Canada for use in all provinces and territories. No studies to  
32  
33 date have evaluated the impact of this tool on providers or patients.  
34  
35  
36  
37  
38  
39  
40

41 Our study focuses on developing, implementing and evaluating an online tool in primary care  
42  
43 settings that focuses on income security. This study emerges from an ongoing collaboration  
44  
45 between family physicians, researchers and a charitable financial literacy organization, Prosper  
46  
47 Canada [29]. This paper describes the protocol for this mixed-methods study that will evaluate  
48  
49 the implementation and impact of this online income security tool. Our study will assess: 1)  
50  
51 whether health providers find using a tool to address income security in a clinical setting feasible  
52  
53 and acceptable; 2) lessons learned and opportunities identified to integrate the tool within the  
54  
55  
56  
57  
58  
59  
60

regular workflow of primary health care organizations; 3) feedback from patients using the online tool and the short-term impacts on awareness and access to benefits.

## METHODS/ DESIGN

This study will use qualitative and quantitative methods to evaluate the feasibility and acceptability of using an online tool in primary care to address income security. The online income tool will be implemented at six primary care clinics, three in Toronto, Ontario and three in Winnipeg, Manitoba. All sites serve large numbers of patients with complex health needs and low socioeconomic status (Table 1).

*Table 1. Clinic characteristics for 6 primary care sites in Ontario and Manitoba*

| Site                                                          | Location         | Clinic type        | Patient population                                                                            | Provider(s) who predominantly administers the online tool | Enrollment in study                                                            |
|---------------------------------------------------------------|------------------|--------------------|-----------------------------------------------------------------------------------------------|-----------------------------------------------------------|--------------------------------------------------------------------------------|
| 80 Bond Clinic, St. Michael's Hospital Academic Family Health | Toronto, Ontario | Family Health Team | Over 30% of patients live in neighbourhoods that have average incomes in the lowest quintile. | Family physicians and nurse practitioner                  | Reception staff provide patients an information sheet or health care providers |



|                                                      |                       |                            |                                                                                                                                                                                                                           |                                                                                                |                                      |
|------------------------------------------------------|-----------------------|----------------------------|---------------------------------------------------------------------------------------------------------------------------------------------------------------------------------------------------------------------------|------------------------------------------------------------------------------------------------|--------------------------------------|
| Team                                                 |                       |                            |                                                                                                                                                                                                                           |                                                                                                | initiate<br>enrollment               |
| South<br>Riverdale<br>Commun<br>ity Health<br>Centre | Toronto,<br>Ontario   | Community<br>Health Centre | Priority populations<br>include newcomers<br>and patients with<br>substance use or<br>mental health needs                                                                                                                 | Family<br>physician, nurse<br>practitioners and<br>social workers                              | Health care<br>provider<br>initiated |
| South<br>East<br>Toronto<br>Family<br>Health<br>Team | Toronto,<br>Ontario   | Family Health<br>Team      | Serves wide range of<br>patients with a focus<br>on the unattached,<br>medically and/or<br>socially complex,<br>high need patients                                                                                        | Family<br>physicians and<br>patient navigator                                                  | Health care<br>provider<br>initiated |
| Mount<br>Carmel<br>Clinic                            | Winnipeg,<br>Manitoba | Community<br>Health Centre | Serves one of the<br>most impoverished<br>areas in the city. The<br>neighborhood has an<br>unemployment rate<br>of 17% with 34% of<br>the families living in<br>poverty. There are<br>83% female lone-<br>parent families | Family<br>physicians, nurse<br>practitioners,<br>nurses, social<br>workers, support<br>workers | Health care<br>provider<br>initiated |

|        |                    |                         |                                                                                                                                                                                                                                                                                    |                                                                                              |                                |
|--------|--------------------|-------------------------|------------------------------------------------------------------------------------------------------------------------------------------------------------------------------------------------------------------------------------------------------------------------------------|----------------------------------------------------------------------------------------------|--------------------------------|
|        |                    |                         | and 16.9% of the community are members of a visible minority group with another 29% of Indigenous ancestry.                                                                                                                                                                        |                                                                                              |                                |
| Klinik | Winnipeg, Manitoba | Community Health Centre | Serves a diverse inner city community providing a very wide range of services to individuals, families, teens, adults and geriatrics within our geographic community. Special focus for priority populations of marginalized groups such as immigrants and refugees, transgendered | Family physicians, nurse practitioners, nurses, social workers, support workers, counsellors | Health care provider initiated |

|        |                    |                         |                                                                                                                                                          |                                               |                                |
|--------|--------------------|-------------------------|----------------------------------------------------------------------------------------------------------------------------------------------------------|-----------------------------------------------|--------------------------------|
|        |                    |                         | individuals and those living with STIs.                                                                                                                  |                                               |                                |
| Aikins | Winnipeg, Manitoba | Community Health Centre | Serves a generally low-income north Winnipeg neighborhood. Focus on patients within the catchment area with particular interest in chronic disease care. | Family physicians, nurse practitioner, nurses | Health care provider initiated |

The intervention is centred on an online tool that guides users through 12 demographic and income-related questions and subsequently generates a customized list of relevant provincial and federal government benefits and tax credits. The initial screening question “Do you ever have difficulty making ends meet at the end of the month?” has been validated in similar settings to identify patients who live below the Canadian poverty line with 98% sensitivity and 64% specificity [30]. Further questions were determined based on the eligibility criteria for various federal and provincial benefits and tax credit programs. The tool was first used at a community health centre and with a family health team in Toronto for one month to identify technical problems. Following feedback sessions with providers, modifications were made to the tool to improve its overall design for use in this study.

1  
2  
3  
4  
5  
6 An orientation session will be held at each site to introduce primary care providers to the tool  
7  
8 and enroll them in the study as participants. Following this session the tool will be implemented  
9  
10 for a 3-month period. The tool can be used by any member of the health care team, including  
11  
12 physicians, nurses, nurse practitioners, patient navigators and social workers. Each site will have  
13  
14 some flexibility in how the tool will be implemented into the routine workflow of patient care,  
15  
16 based on input from providers at the site. Health providers will be encouraged to use the tool  
17  
18 with every patient seen. The tool can also be used in an opportunistic way, when patients share a  
19  
20 health concern that is linked to low income. Patients who consent to participate in the study can  
21  
22 then use the tool with their health provider. At this time, study sites do not have a formal,  
23  
24 systematic way to identify low-income patients. To minimize bias by providers or reception  
25  
26 staff, all patients who present for care in these clinics will be approached. This intervention was  
27  
28 not randomized because excluding low-income patients from receiving information on eligible  
29  
30 benefits and accessing additional income supports would be unethical. Moreover, the topic may  
31  
32 come up in any given appointment depending on the nature of the visit. Given the limited time  
33  
34 during appointments at some sites family physicians will screen patients for low income and  
35  
36 refer them to a care coordinator (e.g. social worker) to complete the tool (Figure 1).  
37  
38  
39  
40  
41  
42  
43  
44  
45

### 46 **Figure 1. Implementation and evaluation of an online income tool**

47  
48  
49

#### 50 *Participants*

51  
52 The 6 clinics testing the tool will introduce the pilot study to health care providers and interested  
53  
54 providers will be consented to participate. We will aim to have a diverse group of health care  
55  
56  
57  
58  
59  
60

1  
2  
3 professionals use the tool with patients. Health providers and clinic staff will inform patients of  
4  
5 the study through information sheets provided at the front desk of clinics or during an  
6  
7 appointment. After reviewing the information sheet, the patient will note that they consent to  
8  
9 proceed. To preserve anonymity, signed consent from patients will not be sought.  
10  
11

12  
13  
14 All patients seen at the primary care site are eligible to complete the online tool with their  
15  
16 provider. The inclusion criteria for the one month follow-up with patients is as follows: used the  
17  
18 tool approximately one month ago with their health care provider, able to provide consent, 18  
19  
20 years old or above, able to converse in English and able to be reached via telephone or email.  
21  
22  
23  
24

25  
26  
27 The primary aim of this pilot study is to assess the acceptability and feasibility of the  
28  
29 intervention in a clinic setting. There is no pre-defined sample for patients completing the tool  
30  
31 with their provider. This pilot study will help determine study sample calculations for future  
32  
33 clinical trials and the usage and length of time to complete the tool will be monitored [31]. Of  
34  
35 those patients who complete the tool and survey, a subset will be contacted for follow-up . The  
36  
37 target sample size for one-month follow-up is 200 patients in each province for a total of 400  
38  
39 patients. We anticipate that this sample size will be robust enough to determine the acceptability  
40  
41 of using the tool, as well as provide data on impact that will allow for sample size calculation for  
42  
43 future studies of the impact of such tools on income itself.  
44  
45  
46  
47  
48  
49

### 50 *Measures*

51  
52 We will collect a set of data points on each use of the tool. We will not be able to distinguish  
53  
54 repeat users. The tool will record answers to the following demographic questions: age,  
55  
56  
57  
58  
59  
60

1  
2  
3 immigration status, employment status, whether someone in the household has a disability,  
4  
5 household income and how many people live in the household and any existing benefits or tax  
6  
7 credits received by the patient. The tool will also track clinic site, start time and end time of use,  
8  
9 benefits recommended (output of tool) and proportion of users who complete the tool.  
10  
11

### 12 13 14 15 *Patient surveys*

16  
17 At the end of the tool patients will be asked to complete a brief survey on their experience of  
18  
19 using the tool and to provide contact information if interested in being contacted in the future. To  
20  
21 examine the impact of the tool and whether patients learned about new benefits and/or their  
22  
23 financial situation improved a research coordinator will conduct telephone surveys in a subset of  
24  
25 patients that use the tool. Patients will be asked whether the tool is helpful, whether the tool  
26  
27 would be recommended to a friend, whether the information provided was understood and their  
28  
29 level of confidence in taking next steps based on information provided. Since there are no  
30  
31 standardized instruments for evaluating this type of intervention the research team developed  
32  
33 surveys. At the end of the tool we will ask patients' permission to contact them via telephone or  
34  
35 email after one month for structured follow-up interviews.  
36  
37  
38  
39  
40  
41  
42

### 43 44 *Provider focus groups and survey*

45  
46 Three months after participating in the online income tool pilots, providers will be asked to  
47  
48 complete an online, anonymous survey about their experience of using the tool. The purpose of  
49  
50 this survey is to understand the providers' perspective on whether they would use the tool in the  
51  
52 future and whether they would recommend it to a colleague. Providers at each site will also  
53  
54 participate in a focus group discussion that will explore the use of the tool over the last three  
55  
56  
57  
58  
59  
60

1  
2  
3 months and the barriers and facilitators to implementation. A set of questions will be used to  
4  
5 guide the focus groups and the discussions will be audio-recorded and transcribed verbatim.  
6  
7  
8  
9

### 10 *Provider observations and feedback*

11  
12 During the three month-period of pilot testing the online income tool at three sites in Winnipeg  
13  
14 and Toronto, respectively, the use of the tool and its accompanying feedback from study team  
15  
16 members and participating staff is being collected on an ongoing basis. Analytics regarding the  
17  
18 number of times the tool is being used at each site are recorded and shared with study team  
19  
20 members on a weekly basis and any feedback shared about the tool in informal conversations  
21  
22 during site visits, through email, or interim reports is noted in a feedback matrix that will be used  
23  
24 when developing the tool in preparation for its next phase of use.  
25  
26  
27  
28  
29  
30  
31

### 32 *Advisory group*

33  
34 We will organize an advisory committee made of up patients, community agencies and staff to  
35  
36 provide ongoing feedback on the project. Our aim is to engage 4-6 patients to provide input on  
37  
38 how to improve the online tool and its use in clinical settings. The advisory committee will meet  
39  
40 once a month beginning in July 2016 until the end of data collection period in December 2016 to  
41  
42 help interpret findings, make recommendations to the online tool and suggestions for integrating  
43  
44 its use within the care team. Ongoing engagement with patients and stakeholders will help to  
45  
46 determine modifications to the tool, contextualize our findings and promote greater uptake in the  
47  
48 future [32].  
49  
50  
51  
52  
53  
54

## 55 **ANALYSIS PLAN**

56  
57  
58  
59  
60

### *Quantitative Analysis*

The primary outcome of this study is the change in knowledge of benefits (assessed through the end of tool patient survey and telephone interview at 4 weeks). The secondary outcome is change in income (assessed at telephone interview at 4 weeks). Descriptive statistics will be calculated (counts, percentages, means) to summarize variables including patient characteristics, usage of the tool and patient outcomes for all six sites. Outcome measures will be dichotomous and a bivariate analysis (using Student t-tests and chi-square tests, as appropriate) will be performed to determine associations between patient characteristics recorded from the tool and outcome measures (e.g., whether program was helpful, whether the patient is confident in taking next steps and whether their financial situation improved). Independent variables associated with positive patient outcomes and negative patient outcomes will be analyzed separately. Logistic regression analysis will be performed to identify variables independently associated with primary and secondary outcome measures.

### *Qualitative Analysis*

The field notes and transcripts of the focus groups with providers will be analyzed thematically [33]. An initial coding framework will be developed using the focus group guide. Two team members will independently read and code transcripts using NVivo 11 (QSR International). Themes will be refined in an iterative process by comparing codes with the research team and reaching consensus on a final coding framework. The thematic analysis will focus on identifying key facilitators and barriers to implementation and provider perspectives on the impact of the tool and ways to improve similar tools. Field notes collected throughout the study will help contextualize findings for each site and identify similarities and differences across sites. Open-



1  
2  
3 ended questions from patient and provider surveys will also be thematically coded and  
4  
5 categorized. We will identify common experiences associated with using the tool that may  
6  
7 provide insight into how the tool works and ways to improve similar tools in the future.  
8  
9

### 10 11 12 *Ethical considerations*

13  
14  
15 This study has been approved by St. Michael's Hospital Research Ethics Board, the Health  
16  
17 Research Ethics Board at the University of Manitoba, and the Michael Garron Hospital Research  
18  
19 Ethics Board. Informed consent will be obtained for all study participants. Data collected by the  
20  
21 online tool will be anonymous, with no link between answers to questions in the tool and  
22  
23 personal identifying data. It is possible that some patients may feel discomfort when asked the  
24  
25 screening question and they may feel shame or fear stigma if they are experiencing income  
26  
27 insecurity. We will attempt to lessen this possibility by encouraging health providers to  
28  
29 normalize the experience for patients, e.g., "I'm asking all of my patients this question over the  
30  
31 next 3 months". All patient and provider surveys will be anonymized. Finally, participants in  
32  
33 focus groups will not be identified by name and all transcripts will be anonymized during  
34  
35 transcription.  
36  
37  
38  
39  
40  
41  
42

### 43 **DISCUSSION**

44  
45 This study uses an upstream approach to address a root cause of poor health outcomes: poverty.  
46  
47 By exploring the feasibility and acceptability of using an online tool we can establish a  
48  
49 standardized process to screen patients for low income in routine primary care settings. We will  
50  
51 also examine and report on local factors that influence implementation at the different clinic  
52  
53 sites. Moreover, the implementation of the tool will be pragmatic, with the ultimate aim to bring  
54  
55  
56  
57  
58  
59  
60

1  
2  
3 such tools into broader practice through integration into primary healthcare settings. The findings  
4  
5 from this study will provide insight into individual-level interventions to address the social  
6  
7 determinants of health in primary care. Such tools may be useful to a diversity of primary care  
8  
9 providers and could be applicable to other health care settings, such as in discharge planning at  
10  
11 health care institutions. Important strengths of the intervention include opportunities for  
12  
13 providers to offer feedback on the content, design and overall usability of the tool and the  
14  
15 follow-up with patients about changes in their financial situation. Patients and community  
16  
17 agencies represented in the advisory group will help ensure that this study remains focused on  
18  
19 patient-centred outcomes and experiences and will contribute particular perspectives to the  
20  
21 interpretation of our findings.  
22  
23  
24  
25  
26  
27  
28

29 We will evaluate the implementation and short-term effects of this online income security tool  
30  
31 within six health clinics. We will attempt to engage a broad representation of health providers at  
32  
33 each site and will invite all staff to participate in our study. The information provided in the  
34  
35 output of the tool may not be suitably tailored to the needs of all individuals. The time frame of  
36  
37 this study does not permit us to examine health effects, which we would anticipate would take  
38  
39 longer than one month to develop, and which would require a more intense intervention. Future  
40  
41 research could examine whether using this tool, in coordination with other services, with patients  
42  
43 identified as being at risk of developing complex health and social needs could impact on health  
44  
45 and health service use [34, 35]. The hypothesis tested would be that that addressing income  
46  
47 security may reduce the risk of poor health and high service use for some patients.  
48  
49  
50  
51  
52  
53  
54  
55  
56  
57  
58  
59  
60

1  
2  
3 There are two notable limitations to the current version of the tool. First, it focuses only on  
4 income security. A more comprehensive tool could be developed in the future to address  
5 multiple SDOH, such as employment, housing and food security and identify different  
6 community resources depending on patient needs. Second, while we anticipate that the tool will  
7 be able to identify benefits that a patient could be eligible for, the complex process of applying  
8 for benefits may be a barrier to improving income security.  
9  
10  
11  
12  
13  
14  
15  
16  
17  
18  
19

20 This study is timely as awareness and a commitment to act on the SDOH is growing within the  
21 health sector in Canada [17, 36–38] and globally [39–41]. Continuing medical education events  
22 on poverty and health have been established and new medical school curricula is being  
23 created[42]. These efforts may begin to change medical practice. Yet, there are few studies that  
24 have evaluated the implementation and impact of such initiatives. The findings of this study will  
25 contribute to the design of SDOH interventions in health care, particularly when consider the  
26 role of technology and the practical challenges of incorporating interventions into busy health  
27 organizations.  
28  
29  
30  
31  
32  
33  
34  
35  
36  
37  
38  
39  
40  
41  
42  
43  
44  
45  
46  
47  
48  
49  
50  
51  
52  
53  
54  
55  
56  
57  
58  
59  
60

## **List of abbreviations**

SDOH social determinants of health

WE CARE Well-child Care Visit, Evaluation, Community Resources, Advocacy, Referral,  
Education

## **Declarations**

### **Ethics approval and consent to participate**

This study was approved by the St. Michael's Hospital Research Ethics Board (15-353), the Health Research Ethics Board at the University of Manitoba (HS19275:H2016:019) and the Michael Garron Hospital Research Ethics Board (691-1608-Mis-298).

### **Consent for publication**

Not applicable.

### **Availability of data and material**

The datasets generated and analyzed during the current study are not publicly available due to the requirements of the various Research Ethics Boards, but are available from the corresponding author on reasonable request.

### **Competing interests**

1  
2  
3 The authors declare that they have no competing interests.  
4  
5  
6  
7

### 8 **Funding**

9  
10 This study was supported by the Canadian Institutes of Health Research, Intuit Foundation,  
11  
12 Research Manitoba and the St. Michael's Hospital Foundation. None of the funders played any  
13  
14 role in the design of the study, data collection, data analysis, interpretation of data or in writing  
15  
16 or editing this manuscript.  
17  
18  
19

### 20 **Authors' contributions**

21  
22 ADP conceived the study. AS, GH, GB, RG, DR, REG, AK and ADP provided key inputs into  
23  
24 the design of the study and refinements of the protocol. AA, AR and ADP assisted in the writing  
25  
26 of the first draft of the manuscript. ADP, AS, GH, GB, RG, REG and AK assisted with obtaining  
27  
28 funding for the study. AA, AR, AS, GH, GB, RG, DR, REG, JB, AK and ADP contributed to  
29  
30 critical revisions and editing the manuscript for important intellectual content and approved the  
31  
32 final manuscript. ADP had full access to all the information present and takes responsibility for  
33  
34 the accuracy of this paper.  
35  
36  
37  
38  
39  
40  
41  
42

### 43 **Acknowledgements**

44  
45 We gratefully acknowledge all our collaborators at Prosper Canada, particularly Adam Fair,  
46  
47 Marlene Chiarotto and Layla Rich, without whom this work would not be possible. We also  
48  
49 acknowledge the input of our Income and Health Advisory Group members.  
50  
51  
52  
53  
54  
55  
56  
57  
58  
59  
60

## References

1. World Health Organization. Commission on Social Determinants of Health: *Closing the Gap in a Generation*. Geneva: 2008.
2. Hassan A, Scherer EA, Pikcinglis A, Krull E, McNickles L, Marmon G, Woods ER, Fleegler EW: **Improving Social Determinants of Health: Effectiveness of a Web-Based Intervention**. *Am J Prev Med* 2015, **49**:822–831.
3. Kiran T, Pinto AD: **Swimming “upstream” to tackle the social determinants of health**. *BMJ Qual Saf* 2016, **25**(January):138–140.
4. Adler N, Ostrove J: **Socioeconomic status and health : what we know and what we don ’ t**. **PubMed Commons**. *Ann N Y Acad Sci* 1999, **896**:3–15.
5. Adler NE, Stewart J: **Health disparities across the lifespan: Meaning, methods, and mechanisms**. *Ann N Y Acad Sci* 2010, **1186**:5–23.
6. Hwang SW: **Homelessness and health**. *Can Med Assoc J* 2001, **164**:229–233.
7. Tarasuk V, Cheng J, de Oliveria C, Dachner N, Gunderson C, Kurdyak P: **Association between household food insecurity and annual health care costs**. *Can Med Assoc J* 2015:1–8.
8. Kennedy G: **Food for all**. *Can Med Assoc J* 2007, **177**:1473.
9. Vozoris NT, Tarasuk VS: **Household food insufficiency is associated with poorer health**. *J Nutr* 2003, **133**:120–126.
10. Che J, Chen J: **Food insecurity in Canadian households**. *Health reports - Statistics Canada* 2001, **12**:11–22.
11. Bartley M, Blane D, Davey Smith G: **Introduction: Beyond the Black Report**. *Sociol Health Illn* 1998, **20**:563–577.
12. Marmot M, Wilkinson RG: **Psychosocial and material pathways in the relation between**

- 1  
2  
3 **income and health: a response to Lynch et al. *BMJ* 2001, 322:1233–1236.**
- 4  
5  
6 13. Ferrie JE, Shipley MJ, Davey Smith G, Stansfeld SA, Marmot MG: **Change in health**
- 7  
8 **inequalities among British civil servants: the Whitehall II study. *J Epidemiol Community***
- 9  
10 ***Health* 2002, 56:922–6.**
- 11  
12  
13 14. Marmot MG, Shipley MJ: **Do socioeconomic differences in mortality persist after**
- 14  
15 **retirement? 25 year follow up of civil servants from the first Whitehall study. *BMJ* 1996,**
- 16  
17 **313:1177–1180.**
- 18  
19  
20 15. Acheson D: **The Acheson Report.** In *The sociology and politics of health: A reader.* Edited
- 21  
22 by Purdy, M. Banks D. London: Routledge; 2001:111–122.
- 23  
24  
25 16. Wilkinson RG, Pickett KE: **Income inequality and population health: A review and**
- 26  
27 **explanation of the evidence. *Social Science and Medicine* 2006:1768–1784.**
- 28  
29  
30 17. Buchman S: **Screening for poverty in family practice. *Can Fam Physician* 2012, 58:709.**
- 31  
32  
33 18. Andermann A: **Taking action on the social determinants of health in clinical practice: a**
- 34  
35 **framework for health professionals. *Can Med Assoc J* 2016.**
- 36  
37  
38 19. Adams J, White M, Moffatt S, Howel D, Mackintosh J: **A systematic review of the health,**
- 39  
40 **social and financial impacts of welfare rights advice delivered in healthcare settings. *BMC***
- 41  
42 ***Public Health* 2006, 6:81.**
- 43  
44  
45 20. Garg A, Toy S, Tripodis Y, Silverstein M, Freeman E: **Addressing social determinants of**
- 46  
47 **health at well child care visits: a cluster RCT. *Pediatrics* 2015, 135:e296-304.**
- 48  
49  
50 21. Garg A, Butz AM, Dworkin PH, Lewis RA, Thompson RE, Serwint JR: **Improving the**
- 51  
52 **management of family psychosocial problems at low-income children’s well-child care**
- 53  
54 **visits: the WE CARE Project. *Pediatrics* 2007:547–558.**
- 55  
56 22. **HelpSteps** [<http://www.helpsteps.com>]. Last accessed: January 11, 2017.
- 57  
58  
59  
60

- 1  
2  
3  
4  
5  
6  
7  
8  
9  
10  
11  
12  
13  
14  
15  
16  
17  
18  
19  
20  
21  
22  
23  
24  
25  
26  
27  
28  
29  
30  
31  
32  
33  
34  
35  
36  
37  
38  
39  
40  
41  
42  
43  
44  
45  
46  
47  
48  
49  
50  
51  
52  
53  
54  
55  
56  
57  
58  
59  
60
23. Fleegler EW, Lieu TA, Wise PH, Muret-Wagstaff S: **Families' Health-Related Social Problems and Missed Referral Opportunities.** *Pediatrics* 2007, **119**:e1332–e1341.
24. Wylie S a, Hassan A, Krull EG, Pikcilingis AB, Corliss HL, Woods ER, Fleegler EW: **Assessing and referring adolescents' health-related social problems: qualitative evaluation of a novel web-based approach.** *J Telemed Telecare* 2012, **18**:392–8.
25. Gottlieb L, Hessler D, Long D, Amaya A, Adler N: **A Randomized Trial on Screening for Social Determinants of Health: the iScreen Study.** *Pediatrics* 2014, **134**.
26. **Health Leads.** [<https://healthleadsusa.org/>] Last accessed: January 11, 2017.
27. Gottlieb LM, Hessler D, Long D, Laves E, Burns AR, Amaya A, Sweeney P, Schudel C, Adler NE. **Effects of Social Needs Screening and In-Person Service Navigation on Child Health.** *JAMA Pediatr* 2016, **124**:e162521.
28. Centre for Effective Practice. **Poverty: A clinical tool for primary care in Ontario** [<http://effectivepractice.org/resources/poverty-a-clinical-tool-for-primary-care/>] Last accessed: January 11, 2017.
29. **Prosper Canada** [<http://prospercanada.org/About-Us/Overview.aspx>] Last accessed: January 11, 2017.
30. Brcic V, Eberdt C, Kaczorowski J: **Development of a tool to identify poverty in a family practice setting: a pilot study.** *International journal of family medicine* 2011; doi 10.1155/2011/812182
31. Thabane L, Ma J, Chu R, Cheng J, Ismaila A, Rios LP, Robson R, Thabane M, Giangregorio L, Goldsmith CH: **A tutorial on pilot studies: the what, why and how.** *BMC Med Res Methodol* 2010, **10**:1.
32. Ayala GX, Elder JP: **Qualitative methods to ensure acceptability of behavioral and social**



1  
2  
3 **interventions to the target population.** *J Public Health Dent* 2011, **71**(SUPPL. 1):1–17.

4  
5  
6 33. Braun V, Clarke V: **Using thematic analysis in psychology.** *Qual Res Psychol* 2006, **3**(May  
7  
8 2015):77–101.

9  
10 34. Rosella LC, Fitzpatrick T, Wodchis WP, Calzavara A, Manson H, Goel V: **High-cost health**  
11  
12 **care users in Ontario, Canada: demographic, socio-economic, and health status**  
13  
14 **characteristics.** *BMC Health Serv Res* 2014, **14**:532.

15  
16  
17 35. Fitzpatrick T, Rosella LC, Calzavara A, Petch J, Pinto AD, Manson H, Goel V, Wodchis  
18  
19 WP: **Looking Beyond Income and Education.** *Am J Prev Med* 2015:1–11.

20  
21  
22 36. Canadian Medical Associate. *Physicians and Health Equity: Opportunities in Practice.*  
23  
24 Ottawa: 2013.

25  
26  
27 37. College of Family Physicians of Canada. *Best Advice - Social Determinants of Health.*  
28  
29 Toronto: 2015.

30  
31  
32 38. Pinto AD, Glatstein-Young G, Mohamed A, Bloch G, Leung F-H, Glazier RH: **Building a**  
33  
34 **Foundation to Reduce Health Inequities: Routine Collection of Sociodemographic Data in**  
35  
36 **Primary Care.** *J Am Board Fam Med* 2016, **29**:348–355.

37  
38  
39 39. Gottlieb L, Sandel M, Adler NE: **Collecting and applying data on social determinants of**  
40  
41 **health in health care settings.** *JAMA Internal Medicine* 2013:1017–1020.

42  
43  
44 40. Gottlieb LM, Tirozzi KJ, Manchanda R, Burns AR, Sandel MT: **Moving electronic medical**  
45  
46 **records upstream: Incorporating social determinants of health.** *American Journal of*  
47  
48 *Preventive Medicine* 2015:215–218.

49  
50  
51 41. Garg A, Dworkin PH: **Surveillance and Screening for Social Determinants of Health:**  
52  
53 **The Medical Home and Beyond.** *JAMA Pediatr* 2016, **170**:189--90.

54  
55 42. OCFP. **Primary care interventions in poverty** [<http://ocfp.on.ca/cpd/povertytool>]

1  
2  
3  
4  
5  
6  
7  
8  
9  
10  
11  
12  
13  
14  
15  
16  
17  
18  
19  
20  
21  
22  
23  
24  
25  
26  
27  
28  
29  
30  
31  
32  
33  
34  
35  
36  
37  
38  
39  
40  
41  
42  
43  
44  
45  
46  
47  
48  
49  
50  
51  
52  
53  
54  
55  
56  
57  
58  
59  
60

For peer review only

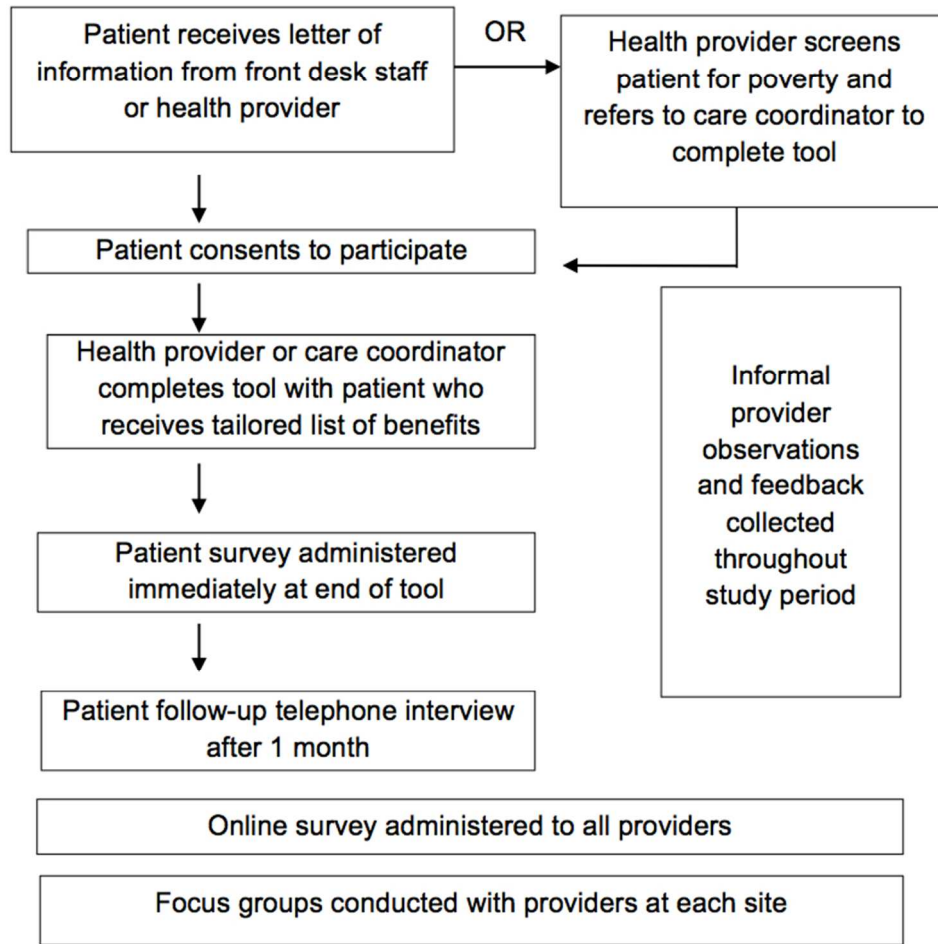

Implementation and evaluation of an online income tool within primary care settings.

140x138mm (150 x 150 DPI)

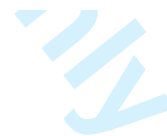

April 14, 2016

Online tool to improve income security

## Evaluating the implementation and impact of an online tool used within primary care to improve the income security of patients with complex health and social needs in Ontario and Manitoba

### 1. Overview

Social conditions that impact the health of individuals have been labeled the social determinants of health (SDOH) and include a person's income security, food security, housing status and educational attainment.<sup>1,2</sup> This project occurs in the context of a growing number of calls for evidence to inform interventions that address SDOH.<sup>3-5</sup> Our objective is to conduct an implementation evaluation of an online tool that addresses income security at several primary care sites and to assess the short-term impact on patients. This tool works by prompting the health provider to screen for poverty, and if identified, to recommend benefits or other financial resources, as well as local community resources to assist with obtaining these benefits. Using continuing medical education materials that have been created by study team members, we will introduce the concept of screening for poverty and intervening to six clinic sites. We will collect input from these sessions to inform the development of the tool. We will form patient advisory groups in Toronto and Winnipeg to provide input on the tool as well. We will then pilot the tool in the six primary care clinics and collect immediate feedback from patients when they finish using the tool. After the tool has been in use for three months we will send online surveys to all providers at the six clinics and invite them to participate in focus groups. Finally, we will follow-up with patients at one month after they complete using the tool, using a telephone survey, to collect further input and get a sense of how its use had an impact on their knowledge of benefits and ability to access them. Data collected at each point will inform the ongoing refinement and development of the tool.

***Relevance to cross-jurisdictional priority research areas:*** SDOH are relevant to caring for patients with complex health and social needs. For example, Ontarians who are in the top 1% and top 5% of health service use (labeled "high-cost health care users")<sup>6</sup> are significantly more likely to be low-income, a relationship that persists despite controlling for other key factors including age.<sup>7</sup> More recent work by the Health Analytics Branch of the Ontario Ministry of Health and Long-Term Care has found that living in an area with high material and social deprivation is a significant predictor of becoming a high-cost health care user.<sup>8</sup> However, interventions to address SDOH are lacking. This project aims to address this gap, as well as develop new knowledge of how to address SDOH in clinical settings for all patients.

***How this project is both novel and innovative:*** Building on work to date, we will evaluate the implementation of an online tool that assists primary care providers in addressing income security as a high-impact intervention on a key social determinant of health (SDOH). This online tool is currently at the very early stages of development, in partnership with Prosper Canada, a national charitable organization that has a mandate to improve financial literacy and has experience in designing and implementing similar online tools. This new online tool will be modified for use in Ontario and Manitoba in close consultation with patients and providers. It will help providers to screen patients for income insecurity, recommend benefits or other financial resources and then connect the patient to local benefit programs and resources, such as community agencies, financial literacy coaching, tax clinics and free services.

1 Online tool to improve income security

## 2 **2. Study questions**

- 3
- 4
- 5
- 6 a) Do health providers find using a tool to address income security in a clinical setting both
- 7 feasible and acceptable?
- 8 b) What are the lessons learned and the opportunities identified when implementing an
- 9 online tool to address income security within the regular workflow of primary health care
- 10 organizations? What are the jurisdictional or context specific concerns encountered?
- 11 c) What is the perspective of patients on using an online tool to address income security in a
- 12 primary care setting and what is the short-term impact on awareness of benefits and
- 13 community resources?
- 14
- 15

## 16 **3. Background and significance**

17

18

19 The social conditions that impact the health of individuals have been labeled the social

20 determinants of health (SDOH). These are “the conditions in which people are born, grow, live,

21 work and age. These circumstances are shaped by the distribution of money, power and

22 resources at global, national and local levels”.<sup>1</sup> Perhaps the most important SDOH is income

23 security, a person’s actual, perceived and expected income.<sup>9</sup> Numerous studies confirm that

24 income is a key determinant of health. In every society studied, the poor tend to live shorter

25 lives, experience a greater burden of disease and disability, and rate their health status as worse

26 than the wealthy.<sup>10-16</sup> Income influences the presence and severity of most health conditions.

27 Across population groups, and across time, the income-health link is robust. Material deprivation

28 appears to be a key factor. Living in poverty means being unable to buy basic necessities such as

29 healthy foods<sup>17-19</sup> or pay the rent.<sup>20</sup> Some of the poorest citizens – those reliant on social

30 assistance – have been shown to have worse health and be at greater risk of food insecurity than

31 those with other income sources.<sup>21</sup>

32

33

34

35 Both the Ontario Medical Association<sup>5</sup> and the Canadian Medical Association (CMA)<sup>4</sup> have

36 called for the development of new evidence around interventions to address poverty as a health

37 issue. In 2013, in partnership with several media organizations, the CMA conducted a series of

38 town halls across Canada on the topic of “Health care in Canada: What makes us sick?” One of

39 the twelve recommendations that developed from this initiative was, “*That local databases of*

40 *community services and programs (health and social) be developed and provided to health care*

41 *professionals, and where possible, targeted guides be developed for the health care sector.*”<sup>22</sup>

42

43

44

45 Research from Ontario on patients with complex health and social needs (i.e. the top 1% and 5%

46 of health care users) has demonstrated that having low income is a strong predictor of becoming

47 a “high-cost user” (HCU). Even after adjusting for age, sex and comorbidities, income security –

48 and related factors such as food security and housing – was a key predictor of health care use.<sup>7</sup>

49 As the authors noted, “knowledge of the upstream determinants of HCU, particularly those that

50 are non-clinical in nature, such as SES and health behaviors, is desperately lacking”.<sup>7, p.6</sup>

51

52

53 Interventions to address SDOH are rarely found within our health care system. This is a gap

54 within community-based primary health care, which has a mandate to provide preventative

55 medicine, deliver health promotion and serve the needs of vulnerable communities.<sup>23</sup> While the

56 public health sector has encouraged the implementation of interventions that target low-income

57

58

59

60

April 14, 2016

1 Online tool to improve income security

2  
3 individuals, these are mainly focused at the community-level.<sup>24</sup> We are not aware of any  
4 Canadian examples of systematic individual-level interventions that have been implemented to  
5 improve income security. Manitoba has made significant progress in developing the tools to  
6 address poverty within the health care setting building on the tools developed in Ontario but the  
7 tools have not yet been implemented. Anecdotal evidence suggests the positive impact of  
8 increased income on patients' health but, as yet, there is no rigorous research evidence in Canada  
9 to confirm these claims. However, evidence does exist from other jurisdictions. Welfare benefits  
10 advice services have been active for two decades in the United Kingdom. Many of these operate  
11 within, or in collaboration with, primary care health care practices.<sup>25-27</sup> Research has shown that  
12 recipients of these services tended to be older, more likely to have a disability or long-term  
13 illness, and to rely on welfare benefits as their main source of income,<sup>28</sup> hence situating the  
14 provision of this advice in primary health care appears to be acceptable and feasible.<sup>29,30</sup> A  
15 systematic review of the literature, mostly from the United Kingdom, concerning welfare advice  
16 found that it increased the income of recipients, although improvements in health were not  
17 captured in most studies.<sup>31</sup>

18  
19  
20  
21  
22 Financial advice programs in Toronto are well established in some non-primary care settings,  
23 such as the Financial Advocacy and Problem Solving service run by St. Christopher House.<sup>32</sup>  
24 This program offers expert financial "problem solvers" who work with clients to maximize their  
25 income supports, financial literacy, and financial independence. The program also actively  
26 promotes the development of similar programs through other agencies and engages in policy  
27 advocacy and community development initiatives to address income inequality. According to  
28 their internal 2010 evaluation, in that year they served 2,334 clients and their clients accessed  
29 more than \$4.5 million in additional funds through the use of their services.

30  
31  
32  
33 An additional example from Toronto is the work of Street Health in assisting the homeless with  
34 applying to the Ontario Disability Support Program (ODSP). In 2005, in collaboration with  
35 lawyers, physicians and allied health professionals and a number of organizations, Street Health  
36 staff worked with 85 homeless individuals to submit applications for ODSP. This built on  
37 previous examples of such assistance programs. The majority had multiple physical and mental  
38 health conditions. Of these, 70% needed significant help in overcoming barriers to applying for  
39 this additional income, such as the 90-day time limit to apply, accessing a physician to complete  
40 an assessment, completing forms and keeping in touch throughout the process. Over 90% of  
41 individuals were eventually successful in their application, with the supports provided.<sup>33</sup>

42  
43  
44  
45 It is challenging to estimate the need for such income security interventions. However, many  
46 low-income individuals do not file taxes, so miss out on substantial income available through tax  
47 benefits. Estimates from the Ontario Ministry of Community and Social Services indicate that  
48 social assistance recipients can increase their annual income by 10-50% through tax filing alone.  
49 <sup>34</sup> Many do not access other eligible government income benefits. Screening to identify patients  
50 living in poverty, and to assist those who would benefit to tax file and access other benefits is,  
51 therefore, an effective and rapid means of boosting incomes.

52  
53  
54 ***Existing tools and approaches to improve income security within health care settings***  
55 *Distributing a paper-based tool focused on poverty and health*  
56  
57  
58  
59  
60



1 Online tool to improve income security

2  
3 Dr. Gary Bloch (Co-Applicant on this project), in collaboration with other health professionals,  
4 developed a simple tool for practitioners to screen patients for poverty, adjust their health risk  
5 assessment accordingly and intervene to increase income.<sup>35</sup> Specific interventions that are  
6 recommended include identifying if the patient has filed his or her taxes and obtained tax credits,  
7 identifying other government income benefit programs patients may be eligible for but not  
8 accessing, and referring patients to community and online supports and resources to help them  
9 access benefits. This tool has been adapted for, and is being piloted in, Manitoba, British  
10 Columbia and Nova Scotia. In Manitoba, there have been a range of ideas developed for  
11 distributing this information, which will soon be hosted on the Manitoba Health, Healthy Living  
12 and Seniors (Government of Manitoba) website. In addition, an active group of policy, research  
13 and practice experts (including Co-Applicants on this project) have been planning to upscale the  
14 initiative through electronic medical record (EMR) links, the medical training curriculum and a  
15 comprehensive approach for evaluating impact.  
16  
17  
18  
19

### 20 *Providing a resource book to address social needs*

21 A study conducted in Baltimore at a large urban hospital-based pediatric clinic examined the  
22 impact of using a brief screening tool to identify social needs within ten domains, and then  
23 provide patients with a tear-out that contained information about a relevant community-based  
24 resource. Led by Dr. Arvin Garg, the Well-child Care Visit, Evaluation, Community Resources,  
25 Advocacy, Referral, Education (WE CARE) Study found that this intervention increased the  
26 odds that a parent would contact a community resource, and most involved reported it added less  
27 than 2 minutes to the visit.<sup>36</sup>  
28  
29

### 30 *Developing a volunteer advocate program to address social needs*

31 Several programs exist whereby patients are screened for social needs and volunteers assist in  
32 connecting these patients with community resources. For example, the Health Leads Program,  
33 which began in Boston and now exists in many locations throughout the USA. At the core of this  
34 intervention is the action of doctors, nurses and social workers to “prescribe” basic resources  
35 such as income, food and heat. A team of advocates “fill” these prescriptions by connecting  
36 patients with community resources and support programs. These advocates are volunteers who  
37 are trained to access such resources and are based in health care settings. While outcome studies  
38 have not been performed on this program, the uptake has been remarkable with 7,000 volunteers  
39 having served 23,000 patients since 2010.<sup>37</sup> A prospective study of Health Leads by Dr. Arvin  
40 Garg in a pediatric clinic in Baltimore found that over 2.5 years, 1059 families made use of the  
41 program and within 6 months over 50% had enrolled in at least one community-based resource.  
42 Similar programs include Health Begins (<http://www.healthbegins.org/>) in California and Basics  
43 for Health, which is beginning at REACH Community Health Centre in Vancouver, British  
44 Columbia.<sup>38</sup>  
45  
46  
47  
48

### 49 *Using an online tool to address broad social needs*

50 A team of health professionals at Boston Children’s Hospital, led by Dr. Eric Fleegler, identified  
51 that a number of children and adolescents presenting in the clinic had significant social needs.<sup>39</sup>  
52 <sup>40</sup> In response, they developed an online tool called *HelpSteps* that assists patients and providers  
53 screen for social needs and then direct them to local resources. The tool collects information  
54 about gender, age, income, housing status, food security, asthma symptoms, environmental risks  
55 and health service need. The tool allows the user to select specific agencies and then print out a  
56  
57  
58  
59  
60

April 14, 2016

1 Online tool to improve income security

2  
3 list, including directions and a brief description.<sup>41</sup> A study with 50 users of the tool found that it  
4 took on average 25 minutes to use the tool, 90% identified at least one social need and 96%  
5 would recommend its use to a friend or peer. The main strengths were that it was private, easy to  
6 use, relevant and recommend referrals that were close by. The negative aspects were the length  
7 of time it took to use, some challenges with navigating the tool and the lack of capacity at  
8 agencies recommended.<sup>42</sup>

#### 11 *Hiring a staff person to focus on income security health promotion*

12 A full-time income security health promoter works with patients at the St. Michael's Hospital  
13 Academic Family Health Team to improve the income security of patients.<sup>43</sup> To that end, her  
14 activities includes: providing one-to-one case management support and ongoing follow-up to  
15 diverse low-income patients and families regarding their income security; conducting outreach to  
16 low income patients of the Family Health Teams (FHT), in collaboration with team health  
17 providers; developing and implementing targeted information self-help sessions, such as;  
18 banking basics, income tax submissions, and social service forms, for the target population;  
19 developing and maintaining up-to-date detailed knowledge of financial issues and financial  
20 services affecting low-income people, and applying this knowledge in his/her work; assisting  
21 individual low-income patients with income security-focused interventions, including access to  
22 tax benefits, applications for income security programs such as social assistance and seniors and  
23 child benefits, and navigation of disability support programs; and liaising with external  
24 organizations, including community social support agencies, legal aid clinics, homeless support  
25 agencies, advocacy groups and agencies focused on vulnerable sub-populations to develop  
26 referral pathways and supports for patients, with a focus on empowering patients to become  
27 change agents. A detailed evaluation of this novel service is underway, led by Dr. Andrew Pinto  
28 (Nominated Principle Applicant on this study).

#### 34 **4. Methods**

35  
36 In Part 1, we will conduct an implementation evaluation of the tool at six primary care sites, half  
37 in Ontario and half in Manitoba, that serve large numbers of patients with complex health and  
38 social needs. We will collect feedback from health providers through an online survey of all  
39 users and through focus groups at each site. In Part 2, we will conduct a telephone survey of  
40 patients on an ongoing basis at one month after use of the tool. This survey will capture patient  
41 perceptions of using the tool as well as their perception of changes in their knowledge of benefits  
42 and local resources.

#### 46 **Part 1: Implementation evaluation of an online tool used within primary care to improve 47 the income security**

48  
49 We propose to pilot the implementation of a new online tool to screen for poverty and  
50 recommend interventions within primary care organizations. This tool will be developed in close  
51 partnership with Prosper Canada. Our project team has been meeting with Prosper Canada staff  
52 over the past year. As detailed in our Budget document, we have been successful in jointly  
53 securing grants to support this work. This project builds on the software architecture for another  
54 tool created by Prosper Canada, "Money Management Tools for Newcomers"  
55  
56  
57  
58  
59  
60



April 14, 2016

1 Online tool to improve income security

2  
3 (<http://www.newcomerscanprosper.org/>). Of note, the online nature of the tool allows for its  
4 ongoing refinement and development throughout the early phases detailed below.  
5  
6

7 First, we will develop a prototype online tool (Appendix E) with input from the study team and  
8 colleagues, including the Income Security Health Promoter at St. Michael's Hospital. Second, we  
9 will conduct two patient engagement sessions, one in Toronto and one in Winnipeg, where we  
10 will collect input on the concept, design and content from patients identified through the study  
11 team and who attend the clinics where the tool will likely be piloted. This early feedback will be  
12 invaluable to guide the design of this tool. Patients will be compensated for their time with a  
13 modest honorarium. We will conduct a final set of patient engagement sessions toward the end of  
14 the project, to present our findings and obtain feedback on the tool at that point.  
15  
16

17  
18 Third, the concept of the tool will be introduced at six clinic sites that serve large numbers of  
19 patients with complex health needs. In Ontario, these will be identified in collaboration with  
20 Health Links. In Manitoba, the tool will be implemented in clinics with a high prevalence of  
21 people living in poverty. To introduce the tool, a Continuing Medical Education (CME) session  
22 will be conducted at each site by study team members, based on materials developed in  
23 partnership with the Ontario College of Family Physicians (OCFP) Committee on Poverty and  
24 Health (Co-Applicants on this committee include Dr. Gary Bloch (chair), Dr. Ritika Goel and Dr.  
25 Danyaal Raza). These sessions will introduce the evidence behind addressing poverty as a health  
26 concern and demonstrate the tool to providers. Informal feedback from providers at this stage  
27 will be collected and the tool will be modified. Fourth, the tool will then be piloted at these  
28 clinics. The proposed sites provide a variety of settings in which to test the tool.  
29  
30  
31

### 32 Ontario

33 Clinics in Ontario will be approached to participate in this study. Investigators involved with this  
34 project (Pinto, Goel, Bloch, Raza) are leaders in this field and have had initial discussions with  
35 colleagues and administrators about this intervention:  
36

- 37 • **St. Michael's Hospital Academic Family Health Team** serves more than 35,000  
38 patients at six clinics in downtown Toronto. It is one of the largest academic Family  
39 Health Teams in the province. While a broad cross-section of the community is served,  
40 there is a particular focus on serving marginalized populations. In 2010, over 30% of  
41 patients at three of five current clinic sites (St. Jamestown, 410 Sherbourne and 80 Bond)  
42 were found to be in the lowest income quintile, and over 50% in the lowest two income  
43 quintiles.<sup>14</sup>  
44

45 Two additional clinic sites in Ontario will be identified. Preliminary discussions have been had  
46 with colleagues in Kingston and in Sudbury. Appropriate research ethics approval will be sought  
47 at each site as required.  
48

### 49 Manitoba

50 A number of clinics in the Winnipeg region will be approached to participate in this study,  
51 several of which have connections to investigators involved with this project (Katz, Singer):  
52

- 53 • **ACCESS Clinics** offer health and social services that vary from community to  
54 community in order to address the unique needs of the communities they serve.  
55 Services include front line health care from physicians or nurse practitioners to assistance  
56 with mental health, home care, employment and income assistance programs. **ACCESS**  
57  
58  
59  
60

April 14, 2016

Online tool to improve income security

**Downtown** is located in the core downtown area of Winnipeg. It is a new new 42,000 sq. ft. foot centre offering many different services including a primary care clinic, and dental clinic, as well as resources for public health, home care, community mental health, employment and income assistance, and Winnipeg Child and Family Services. **Access River East** offers a primary care services as well as individual counselling, hosting health education, workshops and support groups for a wide range of individuals including those who are caregivers, or have specific chronic conditions. **Access Transcona** offers a primary care services as well as individual counselling, hosting health education, book clubs, workshops and support groups for a wide range of individuals including those who are caregivers, widowers, or have specific chronic conditions.

- **Aikins Street Community Health Centre** is a primary care clinic with a health care team that includes physicians, a physician assistant, nurses, a counselor, and a dietitian. The services are available to residents within a defined area of Winnipeg more generally associated with lower socioeconomic status.
- **Northern Connections Medical Centre** is a primary care clinic that offers comprehensive primary care to individuals temporarily in Winnipeg from specific northern communities and military families posted in Winnipeg. The clinic is also a teaching site of the Family Medicine residency program with an interdisciplinary care team that includes primary care physicians, family medicine residents (students), nurses, a registered dietitian, a pharmacist and a social worker.

Each site will have some flexibility in how the tool will be implemented into the routine workflow of patient care, based on input from providers at the site. Health providers will use the tool with every patient seen, at each Annual Physical or Periodic Health Visit, or with specific patient groups (e.g. prenatal patients and well-baby visits). Some sites will also use the tool in an opportunistic way, when patients present with a concern that is linked to social determinants of health. Where possible, there will be a direct link to the tool in the EMR at each site. The tool will be used by any member of the health care team, including physicians, nurses, nurse practitioners, physician assistants, health promoters, dietitians, social workers and others, depending on the clinic site. We will track the professional designation of users of the tool.

## Outcome measures

### a) *Online data collected through use of the tool*

We will collect a set of data points on each use of the tool once it is in beta-testing mode. We will not be able to distinguish repeat users. The following will be entered in by the health professional working with the patient to go through the tool:

|                       |                                                                                                                                                                                                                                                                                     |
|-----------------------|-------------------------------------------------------------------------------------------------------------------------------------------------------------------------------------------------------------------------------------------------------------------------------------|
| Socio-demographics    | Year of birth, gender identity, race/ethnicity, language preference, whether born in Canada or not (and year of arrival), household income and the number of people supported. The format of these questions will match those recommended by the Toronto Centre LHIN. <sup>44</sup> |
| Geographic location   | Established using Internet Cache Protocol (ICP)                                                                                                                                                                                                                                     |
| Time                  | Start time and end time of use                                                                                                                                                                                                                                                      |
| Benefits recommended  | Output of tool                                                                                                                                                                                                                                                                      |
| Resources recommended | Output of tool                                                                                                                                                                                                                                                                      |

1 Online tool to improve income security  
2

|                   |                                             |
|-------------------|---------------------------------------------|
| 3 Completion rate | 4 Proportion of users who complete the tool |
|-------------------|---------------------------------------------|

5  
6 **b) Brief survey of participants at conclusion of tool**

7 At the end of the tool, we will pose a number of questions to users (**Appendix A**), including  
8 asking permission to contact them in the future as part of the evaluation.  
9

10  
11 **c) Online survey to providers**

12 After 3 months, online, anonymous surveys (**Appendix B**) will be circulated to all health  
13 professionals on their experience of using the tool. We will record contact information for health  
14 providers during the introductory sessions held at each site (**Appendix G**). We do not intend to  
15 collect identifying information on providers other than their professional designation.  
16

17  
18 **d) Focus groups with providers**

19 We will invite all health professionals at each site via email to participate in a focus group  
20 discussion that will explore perspectives, experiences and challenges regarding use of the online  
21 tool over the last 3 months. A semi-structured interview guide (**Appendix C**) will be employed  
22 for the focus group and discussions will be audio-recorded and transcribed. To identify obstacles  
23 to using the tool we will specifically explore cases where a provider felt the tool would have  
24 been appropriate, but the tool was not used. Informed consent will be obtained (**Appendix F**).  
25

26  
27 At St. Michael's Hospital Academic Family Health Team we will conduct 2 focus groups with  
28 health care providers. Focus groups will be conducted at 1 month and 3 months following  
29 implementation of the online tool. The 1 month follow-up focus group will provide preliminary  
30 feedback on use of the tool. We will explore perspectives, experiences and challenges regarding  
31 use of the online tool over the last month and how they plan to use the tool over the next 2  
32 months using a semi-structured interview guide (**Appendix L**).  
33

34  
35 **Part 2: Impact evaluation of an online tool used within primary care to improve the income**  
36 **security**  
37

38 To examine patient experience of the tool and whether their financial situation improved, a brief  
39 (10 minute) telephone survey will be conducted in a subset of patients that use the tool. To  
40 recruit patients, at the end of the tool we will ask their permission to contact them via telephone  
41 or email to follow-up at 1 month. Ideally, this follow-up will be completed via phone. However,  
42 if a patient does not have a phone, email may be used to set up an in-person interview, to be  
43 conducted at the patient's home clinic site.  
44  
45

46  
47 The inclusion criteria are as follows:

- 48 a) A patient who completed using the tool approximately 1 month ago, either on their own  
49 or as part of the screening process with their health care provider  
50 b) Able to provide consent  
51 c) Age is greater than or equal to 18  
52 d) Able to converse in English  
53 e) Able to be reached via telephone or email  
54  
55  
56  
57  
58  
59  
60

April 14, 2016

1 Online tool to improve income security

2  
3 Patients will be randomly selected into the telephone sample to a target sample size of 200  
4 patients in each province for a total of 400 patients. Study feasibility is the primary driver for  
5 limiting the telephone sample to a subset of patients. Further, we feel that 400 patients will be  
6 sufficient to determine the impact of using the tool. Three phone calls will be attempted before a  
7 patient will be removed from the telephone survey sample. Consent will be obtained and  
8 documented at the beginning of the phone call and calls will not be recorded (**Appendix D**).  
9 Patients will be excluded if they do not provide consent, are unable to converse in English.  
10  
11

### 12 ***Data Collection and Measures***

13  
14 It is estimated that the interview will take 10 minutes. Several questions will be asked; these  
15 focus on learning whether the patient found the online tool helpful, what benefits were suggested  
16 and whether resources were accessed in order to obtain these benefits. We will also explore  
17 whether there was any change in a patient's financial situation (e.g., increased in income or  
18 reduction in expenses). The interviewer will enter data into the Telephone Survey Data Form  
19 (**Appendix H**) in real-time. Most data will be coded upon entry and free-text will be coded for  
20 qualitative analysis.  
21  
22

### 23 ***Analysis Plan***

24 Descriptive statistics will be calculated (counts, percentages, means) and a bivariate analysis  
25 (using t-tests and chi-square tests, as appropriate) will be performed to determine associations  
26 between patient characteristics and program outcomes (e.g., whether program was helpful,  
27 whether financial situation is improved). A regression analysis is also planned to determine  
28 patient predictors of program success. The answers to open-ended questions will be coded and  
29 categorized to determine whether certain themes characterize the experience of using the tool  
30 and the recommended resources.  
31  
32

### 33 **5. Collaboration**

34 This project occurs in the context of ongoing collaboration between team members based in  
35 Ontario and Manitoba, who have a shared interest in a) screening for SDOH in clinical spaces at  
36 the individual level, b) addressing SDOH through innovative interventions in primary health care  
37 and c) the use of electronic medical records (EMR) to improve health equity. Team members are  
38 also part of a network that includes colleagues in British Columbia, Saskatchewan, Quebec and  
39 Nova Scotia, who are working to address SDOH.  
40  
41  
42

43 This study will support cross-jurisdictional scans of work that is occurring to address social  
44 determinants in Canada, with a focus on Manitoba and Ontario. We will establish a standard  
45 process for screening patients for income security, a key determinant of health. We will design  
46 and implement a standard process for identifying community resources to address upstream  
47 factors and SDOH. We will examine and report on local factors that influence implementation of  
48 this sort of tool. Finally, we will examine the ability to integrate this tool into the EMR (e.g.  
49 through having a link present on dashboards or actually bringing content into the EMR).  
50  
51  
52

53 This study is clearly focused on an “upstream approach to prevention” of health problems  
54 through intervening on a key SDOH, income security. If successful, this innovative approach  
55 will add a new element to Community-Based Primary Health Care.  
56  
57  
58  
59  
60

1 Online tool to improve income security

2  
3 Key strengths of this project include the strong alliance between academics, front-line clinicians,  
4 policy makers and a charitable organization. This project is focused on the development and  
5 evaluation the delivery of integrated services within and across the health sector, and engages  
6 other sectors in meeting the needs of patients. We will make use of multiple types of data  
7 (quantitative and qualitative) drawn from multiple settings. This project engages patients and  
8 providers in the development and evaluation of a unique intervention. Finally, the  
9 implementation of the tool will be pragmatic, with the ultimate aim to bring such tools into  
10 practice.  
11  
12

## 13 **6. Ethical concerns**

### 14 a) Informed consent process

15  
16 For the data collected at the end of the online tool, consent will be implied by answers provided  
17 to the questions. Similarly, when providers complete the online survey, a notice will indicate that  
18 consent is implied by completing the survey. Focus group participants will complete an informed  
19 consent process at the beginning of the group discussion. Finally, an informed consent checklist  
20 will be completed with patients who participate in the telephone survey.  
21  
22  
23

### 24 b) Potential risks

25  
26 Because some time will be used for the tool at the beginning of patient interactions, there is the  
27 theoretical risk of taking that time away from a time-limited patient appointment. We will  
28 emphasize to participants that participation in the study should neither displace discussion of any  
29 medical problems during the appointment, nor should it replace any other income-related  
30 interventions that the participant would otherwise make. The screening question may lead to an  
31 exposition of a patient problem that the practitioner does not have the resources or expertise to  
32 manage. In that case, we will recommend that the patient be referred to the in-house social  
33 worker or other relevant professional. All study participants will face a slight inconvenience  
34 from participating in the study, due to the time dedicated to the questionnaires and the focus-  
35 group session. It is possible that some patients may feel discomfort when asked the screening  
36 question, and they may feel shame or fear stigma if they are experiencing income insecurity. We  
37 will attempt to lessen this possibility by encouraging participants to normalize the experience for  
38 patients, e.g., "I'm asking all of my patients this question over the next month". Study  
39 participants may themselves feel discomfort when asking the question to patients. During the  
40 initial training session, we will suggest ways to ease into approaching this topic.  
41  
42  
43  
44

### 45 c) Potential benefits

46  
47 There are many potential benefits to this study. It may sensitize health professionals to the  
48 importance of income and health and help physicians discover income as a hidden factor  
49 complicating some of their patients' conditions. This study may help health professionals  
50 become familiar with easy ways of screening for poverty and assisting their patients with  
51 resources. Importantly, this study may provide patients with valuable resources for improving  
52 their income. Finally, this study can support the development of a widely-used tool for  
53 improving health through income in other jurisdictions.  
54

55  
56 d) Privacy and confidentiality: All health care providers who are study participants will be  
57 recruited via internal email contact. Participants will be assigned a study number, which will then  
58  
59  
60



April 14, 2016

1 Online tool to improve income security

2  
3 be used throughout the study. A master linking log, linking the participant name with study  
4 number, will be kept on a password-protected on a secure server. Signed consent forms used in  
5 the focus groups will be kept in a locked filing cabinet and will not be linked to the participant's  
6 study number. The web-based tool will not track participant names or patient information. All  
7 surveys will be anonymized via study number. Responses during the focus-group sessions will  
8 be anonymized during or after transcription. The audio recording will be kept in a locked cabinet  
9 and destroyed 10 years after completion of the study.  
10  
11

## 12 **7. Limitations**

13 This study will only examine the implementation and short-term (one month) effects of the  
14 income security tool within the defined health clinics at this point. Hence, we will be focusing on  
15 early adopters. We will attempt to engage a broad representation of health providers at each site.  
16 The information provided may not be suitably tailored to the needs of individuals, which may be  
17 a consideration for future research. The time frame of this study restricts the findings to use of  
18 the poverty tool and potential use of social resources and services, but does not enable us to  
19 examine health effects. Future work will look at the impact of using this tool with patients  
20 identified as at risk of developing complex health and social needs, with the hypothesis that  
21 addressing income security may reduce the risk for some patients.  
22  
23  
24

## 25 **8. Study team**

26  
27  
28 **Andrew D. Pinto** (Nominated Principal Applicant) is a Public Health and Preventive Medicine  
29 specialist and family physician at St. Michael's Hospital Academic Family Health Team. He is a  
30 Scientist in the Li Ka Shing Knowledge Institute at St. Michael's Hospital. He is an Assistant  
31 Professor in the Department of Family and Community Medicine, Faculty of Medicine and the  
32 Dalla Lana School of Public Health at the University of Toronto. He has experience in evaluating  
33 novel interventions that address SDOH.  
34  
35

36  
37 **Kristin Anderson** (Knowledge User) is the Director, Primary Care at Manitoba Health, Healthy  
38 Living and Seniors. She has been involved with the poverty tool initiative in Manitoba and a key  
39 decision maker for its development and progress.  
40

41 **Adam Fair** (Knowledge User) is Director of Programs at Prosper Canada, a national charity  
42 dedicated to expanding economic opportunities for Canadians living in poverty through program  
43 and policy innovation. He has extensive experience with developing and implementing unique  
44 programs to improve financial literacy.  
45  
46

47 **Katelin McDermott** (Knowledge User) is a Program Analyst at Manitoba eHealth and works  
48 with EMR data quality and optimization for the Primary Care Information Systems office  
49 (PCIS). This role supports adoption and effective implementation of clinical information  
50 systems, in collaboration with Manitoba Health, Healthy Living and Seniors.  
51  
52

53 **Alan Katz** (Principal Applicant) is Professor and Clinician Researcher at the University of  
54 Manitoba, Departments of Community Health Sciences and Family Medicine. He is also the  
55 Director of the Manitoba Centre for Health Policy; the Research Lead for the Manitoba SPOR  
56 PIHCI Network (MSN) and Manitoba Chair in Primary Prevention Research. He has extensive  
57  
58  
59  
60

April 14, 2016

1 Online tool to improve income security

2  
3 research expertise and has been a key collaborator with strategic development of the poverty tool  
4 initiative in Manitoba.  
5

6  
7 **Gary Bloch** (Co-Applicant) is a family physician within the Department of Family and  
8 Community Medicine, St. Michael's Hospital, and an Assistant Professor within the Department  
9 of Family and Community Medicine, University of Toronto. He is Chair of the Social  
10 Determinants of Health Committee within the Department of Family and Community Medicine,  
11 St. Michael's Hospital, and the Chair of the Poverty Committee, Ontario College of Family  
12 Physicians. He has extensive experience in developing tools to assist primary care providers to  
13 address poverty amongst their patients.  
14

15  
16 **Ritika Goel** (Co-Applicant) is a family physician at Inner City Family Health Team and  
17 Sistering, a women's drop-in centre. She also volunteers and serves as a board member for the  
18 Scarborough Community Volunteer Clinic for the Uninsured. She is involved in medical  
19 education relating to poverty and health as part of the Ontario College of Family Physicians'  
20 Poverty and Health Committee. She will assist with the pilot implementation at Inner City  
21 Family Health Team.  
22  
23

24  
25 **Gayle Halas** (Co-Applicant) is a Researcher with the University of Manitoba Department of  
26 Family Medicine. She has an interest in patient education and interaction and brings a  
27 qualitative research perspective to the project and will facilitate the work being done within  
28 Manitoba.  
29

30  
31 **John Ihnat** (Co-Applicant) is a family medicine resident within the Department of Family and  
32 Community Medicine, Faculty of Medicine, University of Toronto. His Residency Academic  
33 Project supports this study directly and he will be leading the pilot implementation at  
34 Flemingdon Health Centre.  
35

36  
37 **Danyaal Raza** (Co-Applicant) is a family physician within the Department of Family and  
38 Community Medicine, St. Michael's Hospital, and a Lecturer within the Department of Family  
39 and Community Medicine, University of Toronto. He is a member of the the Social Determinants  
40 of Health Committee within the Department of Family and Community Medicine, St. Michael's  
41 Hospital, and is also a member of the Poverty Committee, Ontario College of Family Physicians.  
42 He will assist with the pilot implementation at St. Michael's Hospital.  
43  
44

45  
46 **Alex Singer** (Co-Applicant) is a family physician, Assistant Professor in the Department of  
47 Family Medicine, University of Manitoba as well as the Director of the Manitoba Primary Care  
48 Research Network. Singer was the co-chair of the department of Family Medicine's EMR  
49 implementation committee and is a current member of the Winnipeg Regional Health  
50 Authority's EMR Clinical Advisory Group. He is a consulting member on the Manitoba Health  
51 Primary Care Working Group, with a role in facilitating the linkage between the Poverty tool and  
52 EMR within WRHA funded clinics and potentially with other EMR users in Manitoba.  
53

54  
55 **Ross E.G. Upshur** (Co-Applicant) is currently the Medical Director, Clinical Research,  
56 Bridgepoint Health. He is a Canada Research Chair in Primary Care Research. At the University  
57 of Toronto he is a Professor at the Department of Family and Community Medicine and Dalla  
58  
59  
60

April 14, 2016

1 Online tool to improve income security  
2

3 Lana School of Public Health, Adjunct Scientist at the Institute of Clinical Evaluative Sciences,  
4 an affiliate of the Institute of the History and Philosophy of Science and Technology and a  
5 member of the Centre for Environment. He is an Adjunct Associate Professor in the School of  
6 Geography and Earth Sciences and Associate Member of the Institute of Environment and  
7 Health at McMaster University. He is the former Director of the University of Toronto Joint  
8 Centre for Bioethics (2006-2011) and was a staff physician at the Department of Family and  
9 Community Medicine, Sunnybrook Health Sciences Centre from 1998-2013. He will  
10  
11

## 12 **10. Deliverables**

13  
14  
15 Key deliverables include the development of a new online tool in partnership with Prosper  
16 Canada with patient and provider input; the findings from implementation evaluation (based on  
17 brief patient surveys at the end of the tool, provider online surveys and provider focus groups);  
18 and the findings from the short-term impact evaluation (based on telephone surveys with  
19 patients). Further, through this process we will develop training materials for health providers,  
20 including a brief presentation and manual, on how to use the tool in clinical practice.  
21  
22

## 23 **11. Knowledge translation and impact**

24  
25  
26 Our findings from both part 1 and part 2 will inform the refinement of the tool. This study will  
27 contribute to our understanding of how to assess and intervene on income insecurity, a  
28 significant SDOH within clinical settings. Additional deliverables include the refined income  
29 security online tool that can be adapted for other jurisdictions in Canada and training materials  
30 for health providers on how to use the tool  
31

32  
33 This project will be an important step toward the goal of being able to address social  
34 determinants of health (SDOH) at an individual and family level. If successful, this tool and  
35 others will expand the scope of primary health care and provide a concrete way to address issues  
36 that health providers have long felt were important. This will clearly be useful to many providers  
37 in Ontario, Manitoba and beyond.  
38

39  
40 Our team envisions this tool as being dynamic, with the potential to be quickly modified to fit  
41 different jurisdictions. We will develop and disseminate a plan to assess community resources  
42 that can address SDOH, and this process will be helpful to Ontario's organized primary care  
43 sector (e.g. Family Health Teams, Community Health Centres), Local Health Integration  
44 Networks and local public health units. In Manitoba a significant coalition of healthcare  
45 providers, system planners and community organizations has been working to customize the tool  
46 to present local Winnipeg resources.  
47  
48

49  
50 As an online tool, it is easy to develop new modules to address other key SDOH. This could  
51 include child literacy, housing or employment. We see this as of particular of value to areas in  
52 Ontario with high levels of health inequities where there are multiple, overlapping health and  
53 social services, but no clear system for navigation. This project will contribute to future tools to  
54 address these issues.  
55  
56  
57  
58  
59  
60



1 Online tool to improve income security  
2

3 **References**  
4

- 5  
6 1. Commission on the Social Determinants of Health. Closing the gap in a generation: health  
7 equity through action on the social determinants of health. Final Report of the Commission on  
8 Social Determinants of Health. 2008.  
9  
10 2. Public Health Agency of Canada. 2011. What determines health? [http://www.phac-  
12 aspc.gc.ca/ph-sp/determinants/index-eng.php](http://www.phac-<br/>11 aspc.gc.ca/ph-sp/determinants/index-eng.php)  
13  
14 3. British Medical Association. Social determinants of health - What doctors can do. 2011.  
15  
16 4. Canadian Medical Association. Physicians and health equity: Opportunities in practice. 2012.  
17  
18 5. Ontario Medical Association. Income and health. 2013;2014(01/06).  
19  
20 6. Rais S, Nazerian A, Ardal S, Chechulin Y, Bains N, Malikov K. High-cost users of Ontario's  
21 healthcare services. Health Policy 2013 Aug;9(1):44-51.  
22  
23 7. Rosella LC, Fitzpatrick T, Wodchis WP, Calzavara A, Manson H, Goel V. High-cost health  
24 care users in Ontario, Canada: demographic, socio-economic, and health status characteristics.  
25 BMC Health Serv Res 2014 Oct 31;14:532,014-0532-2.  
26  
27 8. Chechulin Y, Nazerian A, Rais S, Malikov K. Predicting patients with high risk of becoming  
28 high-cost healthcare users in Ontario (Canada). Health Policy 2014 Feb;9(3):68-79.  
29  
30 9. International Labour Organization. Income Security Index: Information. 2006;2014(01/06).  
31  
32 10. Bartley M, Blane D, Smith G. Introduction: beyond the Black Report. Sociology of Health  
33 and Illness 1998;20:563-77.  
34  
35 11. Marmot M, Shipley M, Rose G. Do socioeconomic differences in mortality persist after  
36 retirement? 25 year follow up of civil servants from the first Whitehall study. Br Med J  
37 1996;313:1177-80.  
38  
39 12. Marmot M, Wilkinson R. Psychosocial and material pathways in the relation between income  
40 and health: a response to Lynch et al. Br Med J 2001;322:1233-6.  
41  
42 13. Ferrie J, Shipley M, Smith G, Davey, Stansfeld S, Marmot M. Change in health inequalities  
43 among British civil servants: the Whitehall II Study. J Epidemiol Community Health  
44 2002;56:922-6.  
45  
46 14. Acheson D. The Acheson Report. In: Purdy M, Banks D, editors. The sociology and politics  
47 of health: A reader. London: Routledge; 2001. p.111-22.  
48  
49 15. Wilkinson RG, Pickett KE. Income inequality and population health: a review and  
50 explanation of the evidence. Soc Sci Med 2006 Apr;62(7):1768-84.  
51  
52  
53  
54  
55  
56  
57  
58  
59  
60

April 14, 2016

1 Online tool to improve income security  
2

3 16. Wilkinson RG, Pickett KE. Income inequality and socioeconomic gradients in mortality. *Am*  
4 *J Public Health* 2008 Apr;98(4):699-704.  
5

6 17. Che JC, J. Food insecurity in Canadian households. *Health Reports* 2001;12(4):11-21.  
7

8 18. Vozoris NT, Tarasuk VS. Household food insufficiency is associated with poorer health. *J*  
9 *Nutr* 2003;133:120-6.  
10

11 19. Kennedy G. Food for all. *CMAJ* 2007;177(12):1473.  
12

13 20. Hwang S. Homelessness and health. *Can Med Assoc J* 2005;164(2):229-33.  
14

15 21. Ricciuto LE, Tarasuk VS. An examination of income-related disparities in the nutritional  
16 quality of food selections among Canadian households from 1986-2001. *Social Science and*  
17 *Medicine* 2007;64:186-98.  
18

19 22. Canadian Medical Association and others. *Health care in Canada: what makes us sick?*  
20 *Ottawa (ON): Canadian Medical Association; 2013. 2013.*  
21

22 23. Buchman S. Screening for poverty in family practice. *Can Fam Physician* 2012  
23 *Jun;58(6):709, 710.*  
24

25 24. Manzano AT, Raphael D. CPHA and the social determinants of health: an analysis of policy  
26 documents and statements and recommendations for future action. *Can J Public Health* 2010  
27 *Sep-Oct;101(5):399-404.*  
28

29 25. Abbott S, Hobby L. Welfare benefits advice in primary care: evidence of improvements in  
30 health. *Public Health* 2000 *Sep;114(5):324-7.*  
31

32 26. Abbott S. Prescribing welfare benefits advice in primary care: is it a health intervention, and  
33 if so, what sort? *J Public Health Med* 2002 *Dec;24(4):307-12.*  
34

35 27. Greasley P. Welfare advice in general practice: a resource for community nurses. *Br J*  
36 *Community Nurs* 2005 *08;10(8):368-72.*  
37

38 28. Greasley P, Small N. Establishing a welfare advice service in family practices: views of  
39 advice workers and primary care staff. *Fam Pract* 2005 *Oct;22(5):513-9.*  
40

41 29. Jennings P, Veitch T. Just what the doctor ordered. *Health Serv J* 1993 *Sep*  
42 *1993;103(5371):30-1.*  
43

44 30. Paris JAG, Player D. Citizens' advice in general practice. *Br Med J* 1993 *Jun*  
45 *1993;306(6891):1518-20.*  
46  
47  
48  
49  
50  
51  
52  
53  
54  
55  
56  
57  
58  
59  
60

April 14, 2016

1 Online tool to improve income security

2  
3 31. Adams J, White M, Moffatt S, Howel D, Mackintosh J. A systematic review of the health,  
4 social and financial impacts of welfare rights advice delivered in healthcare settings. BMC  
5 Public Health 2006 Mar 29;6:81.

6  
7  
8 32. St. Christopher's House. Financial advocacy and problem solving. 2013;2013(12/4).

9  
10 33. Shartal S, Cowan L, Khandor E, German B. Failing the homeless: Barriers in the Ontario  
11 Disability Support Program for homeless people with disabilities. 2005.

12  
13  
14 34. Ministry of Community and Social Services. *The Role of Refundable Tax Credits*. . 2013  
15 November 30, 2013;2014(10/22).

16  
17  
18 35. Ontario College of Family Physicians Poverty & Health Committee. Primary Care  
19 Interventions into Poverty. ;2014(3/18/2014).

20  
21 36. Garg A, Butz AM, Dworkin PH, Lewis RA, Thompson RE, Serwint JR. Improving the  
22 management of family psychosocial problems at low-income children's well-child care visits: the  
23 WE CARE Project. Pediatrics 2007 Sep;120(3):547-58.

24  
25  
26 37. Health Leads. Our impact on healthcare. 2013;2013(12/4).

27  
28 38. Bellett G. Basics for Health jumps in when a prescription is not enough. 2013 October 7,  
29 2013;2014(06/23).

30  
31  
32 39. Fleegler EW, Lieu TA, Wise PH, Muret-Wagstaff S. Families' health-related social problems  
33 and missed referral opportunities. Pediatrics 2007 Jun;119(6):e1332-41.

34  
35  
36 40. Hassan A, Blood EA, Pikcingis A, Krull EG, McNickles L, Marmon G, et al. Youths'  
37 health-related social problems: concerns often overlooked during the medical visit. J Adolesc  
38 Health 2013 Aug;53(2):265-71.

39  
40 41. HelpSteps.com. HelpSteps - About. 2014;2014(10/22).

41  
42 42. Wylie SA, Hassan A, Krull EG, Pikcingis AB, Corliss HL, Woods ER, et al. Assessing and  
43 referring adolescents' health-related social problems: qualitative evaluation of a novel web-based  
44 approach. J Telemed Telecare 2012 Oct;18(7):392-8.

45  
46  
47 43. Boudreau E. St. Michael's looking to close health-wealth gap. 2014 March 21,  
48 2014;2014(September 17, 2014).

49  
50  
51 44. St. Michael's Hospital. The Tri-Hospital + Toronto Public Health Health Equity Data  
52 Collection Research Project Report. 2013;2013(12/2).



|    |                                                           |     |                                                                                                               |                       |
|----|-----------------------------------------------------------|-----|---------------------------------------------------------------------------------------------------------------|-----------------------|
| 1  |                                                           |     |                                                                                                               |                       |
| 2  |                                                           |     |                                                                                                               |                       |
| 3  | <b>Introduction</b>                                       |     |                                                                                                               |                       |
| 4  |                                                           |     |                                                                                                               |                       |
| 5  | Background and                                            | 6a  | Description of research question and justification for undertaking the trial, including summary of relevant   | <u>p.4-6</u>          |
| 6  | rationale                                                 |     | studies (published and unpublished) examining benefits and harms for each intervention                        |                       |
| 7  |                                                           |     |                                                                                                               |                       |
| 8  |                                                           | 6b  | Explanation for choice of comparators                                                                         | <u>n/a</u>            |
| 9  |                                                           |     |                                                                                                               |                       |
| 10 | Objectives                                                | 7   | Specific objectives or hypotheses                                                                             | <u>p.5-6</u>          |
| 11 |                                                           |     |                                                                                                               |                       |
| 12 | Trial design                                              | 8   | Description of trial design including type of trial (eg, parallel group, crossover, factorial, single group), |                       |
| 13 |                                                           |     | allocation ratio, and framework (eg, superiority, equivalence, noninferiority, exploratory)                   | <u>p.6</u>            |
| 14 |                                                           |     |                                                                                                               |                       |
| 15 |                                                           |     |                                                                                                               |                       |
| 16 | <b>Methods: Participants, interventions, and outcomes</b> |     |                                                                                                               |                       |
| 17 |                                                           |     |                                                                                                               |                       |
| 18 | Study setting                                             | 9   | Description of study settings (eg, community clinic, academic hospital) and list of countries where data will | <u>p.6-9</u>          |
| 19 |                                                           |     | be collected. Reference to where list of study sites can be obtained                                          |                       |
| 20 |                                                           |     |                                                                                                               |                       |
| 21 | Eligibility criteria                                      | 10  | Inclusion and exclusion criteria for participants. If applicable, eligibility criteria for study centres and  | <u>p.11</u>           |
| 22 |                                                           |     | individuals who will perform the interventions (eg, surgeons, psychotherapists)                               |                       |
| 23 |                                                           |     |                                                                                                               |                       |
| 24 | Interventions                                             | 11a | Interventions for each group with sufficient detail to allow replication, including how and when they will be | <u>p.9-10</u>         |
| 25 |                                                           |     | administered                                                                                                  |                       |
| 26 |                                                           |     |                                                                                                               |                       |
| 27 |                                                           | 11b | Criteria for discontinuing or modifying allocated interventions for a given trial participant (eg, drug dose  | <u>n/a</u>            |
| 28 |                                                           |     | change in response to harms, participant request, or improving/worsening disease)                             |                       |
| 29 |                                                           |     |                                                                                                               |                       |
| 30 |                                                           | 11c | Strategies to improve adherence to intervention protocols, and any procedures for monitoring adherence        | <u>n/a</u>            |
| 31 |                                                           |     | (eg, drug tablet return, laboratory tests)                                                                    |                       |
| 32 |                                                           |     |                                                                                                               |                       |
| 33 |                                                           | 11d | Relevant concomitant care and interventions that are permitted or prohibited during the trial                 | <u>n/a</u>            |
| 34 |                                                           |     |                                                                                                               |                       |
| 35 | Outcomes                                                  | 12  | Primary, secondary, and other outcomes, including the specific measurement variable (eg, systolic blood       | <u>p.14-15</u>        |
| 36 |                                                           |     | pressure), analysis metric (eg, change from baseline, final value, time to event), method of aggregation (eg, |                       |
| 37 |                                                           |     | median, proportion), and time point for each outcome. Explanation of the clinical relevance of chosen         |                       |
| 38 |                                                           |     | efficacy and harm outcomes is strongly recommended                                                            |                       |
| 39 |                                                           |     |                                                                                                               |                       |
| 40 | Participant timeline                                      | 13  | Time schedule of enrolment, interventions (including any run-ins and washouts), assessments, and visits for   | <u>p.10-11, Fig 1</u> |
| 41 |                                                           |     | participants. A schematic diagram is highly recommended (see Figure)                                          |                       |
| 42 |                                                           |     |                                                                                                               |                       |
| 43 |                                                           |     |                                                                                                               |                       |
| 44 |                                                           |     |                                                                                                               |                       |
| 45 |                                                           |     |                                                                                                               |                       |
| 46 |                                                           |     |                                                                                                               |                       |
| 47 |                                                           |     |                                                                                                               |                       |
| 48 |                                                           |     |                                                                                                               |                       |
| 49 |                                                           |     |                                                                                                               |                       |

|   |             |    |                                                                                                                                                                                       |            |
|---|-------------|----|---------------------------------------------------------------------------------------------------------------------------------------------------------------------------------------|------------|
| 1 |             |    |                                                                                                                                                                                       |            |
| 2 |             |    |                                                                                                                                                                                       |            |
| 3 | Sample size | 14 | Estimated number of participants needed to achieve study objectives and how it was determined, including clinical and statistical assumptions supporting any sample size calculations | <u>n/a</u> |
| 4 |             |    |                                                                                                                                                                                       |            |
| 5 |             |    |                                                                                                                                                                                       |            |
| 6 | Recruitment | 15 | Strategies for achieving adequate participant enrolment to reach target sample size                                                                                                   | <u>n/a</u> |
| 7 |             |    |                                                                                                                                                                                       |            |

### 8 **Methods: Assignment of interventions (for controlled trials)**

#### 9 Allocation:

|    |                                  |     |                                                                                                                                                                                                                                                                                                                                                          |            |
|----|----------------------------------|-----|----------------------------------------------------------------------------------------------------------------------------------------------------------------------------------------------------------------------------------------------------------------------------------------------------------------------------------------------------------|------------|
| 10 |                                  |     |                                                                                                                                                                                                                                                                                                                                                          |            |
| 11 |                                  |     |                                                                                                                                                                                                                                                                                                                                                          |            |
| 12 | Sequence generation              | 16a | Method of generating the allocation sequence (eg, computer-generated random numbers), and list of any factors for stratification. To reduce predictability of a random sequence, details of any planned restriction (eg, blocking) should be provided in a separate document that is unavailable to those who enrol participants or assign interventions | <u>n/a</u> |
| 13 |                                  |     |                                                                                                                                                                                                                                                                                                                                                          |            |
| 14 |                                  |     |                                                                                                                                                                                                                                                                                                                                                          |            |
| 15 |                                  |     |                                                                                                                                                                                                                                                                                                                                                          |            |
| 16 |                                  |     |                                                                                                                                                                                                                                                                                                                                                          |            |
| 17 |                                  |     |                                                                                                                                                                                                                                                                                                                                                          |            |
| 18 | Allocation concealment mechanism | 16b | Mechanism of implementing the allocation sequence (eg, central telephone; sequentially numbered, opaque, sealed envelopes), describing any steps to conceal the sequence until interventions are assigned                                                                                                                                                | <u>n/a</u> |
| 19 |                                  |     |                                                                                                                                                                                                                                                                                                                                                          |            |
| 20 |                                  |     |                                                                                                                                                                                                                                                                                                                                                          |            |
| 21 |                                  |     |                                                                                                                                                                                                                                                                                                                                                          |            |
| 22 | Implementation                   | 16c | Who will generate the allocation sequence, who will enrol participants, and who will assign participants to interventions                                                                                                                                                                                                                                | <u>n/a</u> |
| 23 |                                  |     |                                                                                                                                                                                                                                                                                                                                                          |            |
| 24 |                                  |     |                                                                                                                                                                                                                                                                                                                                                          |            |
| 25 | Blinding (masking)               | 17a | Who will be blinded after assignment to interventions (eg, trial participants, care providers, outcome assessors, data analysts), and how                                                                                                                                                                                                                | <u>n/a</u> |
| 26 |                                  |     |                                                                                                                                                                                                                                                                                                                                                          |            |
| 27 |                                  |     |                                                                                                                                                                                                                                                                                                                                                          |            |
| 28 |                                  | 17b | If blinded, circumstances under which unblinding is permissible, and procedure for revealing a participant's allocated intervention during the trial                                                                                                                                                                                                     | <u>n/a</u> |
| 29 |                                  |     |                                                                                                                                                                                                                                                                                                                                                          |            |
| 30 |                                  |     |                                                                                                                                                                                                                                                                                                                                                          |            |
| 31 |                                  |     |                                                                                                                                                                                                                                                                                                                                                          |            |

### 32 **Methods: Data collection, management, and analysis**

|    |                         |     |                                                                                                                                                                                                                                                                                                                                                                                                              |                 |
|----|-------------------------|-----|--------------------------------------------------------------------------------------------------------------------------------------------------------------------------------------------------------------------------------------------------------------------------------------------------------------------------------------------------------------------------------------------------------------|-----------------|
| 33 |                         |     |                                                                                                                                                                                                                                                                                                                                                                                                              |                 |
| 34 | Data collection methods | 18a | Plans for assessment and collection of outcome, baseline, and other trial data, including any related processes to promote data quality (eg, duplicate measurements, training of assessors) and a description of study instruments (eg, questionnaires, laboratory tests) along with their reliability and validity, if known. Reference to where data collection forms can be found, if not in the protocol | <u>p. 11-12</u> |
| 35 |                         |     |                                                                                                                                                                                                                                                                                                                                                                                                              |                 |
| 36 |                         |     |                                                                                                                                                                                                                                                                                                                                                                                                              |                 |
| 37 |                         |     |                                                                                                                                                                                                                                                                                                                                                                                                              |                 |
| 38 |                         |     |                                                                                                                                                                                                                                                                                                                                                                                                              |                 |
| 39 |                         | 18b | Plans to promote participant retention and complete follow-up, including list of any outcome data to be collected for participants who discontinue or deviate from intervention protocols                                                                                                                                                                                                                    | <u>p. 10-11</u> |
| 40 |                         |     |                                                                                                                                                                                                                                                                                                                                                                                                              |                 |
| 41 |                         |     |                                                                                                                                                                                                                                                                                                                                                                                                              |                 |
| 42 |                         |     |                                                                                                                                                                                                                                                                                                                                                                                                              |                 |
| 43 |                         |     |                                                                                                                                                                                                                                                                                                                                                                                                              |                 |
| 44 |                         |     |                                                                                                                                                                                                                                                                                                                                                                                                              |                 |
| 45 |                         |     |                                                                                                                                                                                                                                                                                                                                                                                                              |                 |

|    |                                 |     |                                                                                                                                                                                                                                                                                                                                       |                 |
|----|---------------------------------|-----|---------------------------------------------------------------------------------------------------------------------------------------------------------------------------------------------------------------------------------------------------------------------------------------------------------------------------------------|-----------------|
| 1  |                                 |     |                                                                                                                                                                                                                                                                                                                                       |                 |
| 2  |                                 |     |                                                                                                                                                                                                                                                                                                                                       |                 |
| 3  | Data management                 | 19  | Plans for data entry, coding, security, and storage, including any related processes to promote data quality (eg, double data entry; range checks for data values). Reference to where details of data management procedures can be found, if not in the protocol                                                                     | <u>p. 11-12</u> |
| 4  |                                 |     |                                                                                                                                                                                                                                                                                                                                       |                 |
| 5  |                                 |     |                                                                                                                                                                                                                                                                                                                                       |                 |
| 6  |                                 |     |                                                                                                                                                                                                                                                                                                                                       |                 |
| 7  | Statistical methods             | 20a | Statistical methods for analysing primary and secondary outcomes. Reference to where other details of the statistical analysis plan can be found, if not in the protocol                                                                                                                                                              | <u>p. 13-15</u> |
| 8  |                                 |     |                                                                                                                                                                                                                                                                                                                                       |                 |
| 9  |                                 |     |                                                                                                                                                                                                                                                                                                                                       |                 |
| 10 |                                 | 20b | Methods for any additional analyses (eg, subgroup and adjusted analyses)                                                                                                                                                                                                                                                              | <u>n/a</u>      |
| 11 |                                 |     |                                                                                                                                                                                                                                                                                                                                       |                 |
| 12 |                                 | 20c | Definition of analysis population relating to protocol non-adherence (eg, as randomised analysis), and any statistical methods to handle missing data (eg, multiple imputation)                                                                                                                                                       | <u>n/a</u>      |
| 13 |                                 |     |                                                                                                                                                                                                                                                                                                                                       |                 |
| 14 |                                 |     |                                                                                                                                                                                                                                                                                                                                       |                 |
| 15 |                                 |     |                                                                                                                                                                                                                                                                                                                                       |                 |
| 16 | <b>Methods: Monitoring</b>      |     |                                                                                                                                                                                                                                                                                                                                       |                 |
| 17 |                                 |     |                                                                                                                                                                                                                                                                                                                                       |                 |
| 18 | Data monitoring                 | 21a | Composition of data monitoring committee (DMC); summary of its role and reporting structure; statement of whether it is independent from the sponsor and competing interests; and reference to where further details about its charter can be found, if not in the protocol. Alternatively, an explanation of why a DMC is not needed | <u>n/a</u>      |
| 19 |                                 |     |                                                                                                                                                                                                                                                                                                                                       |                 |
| 20 |                                 |     |                                                                                                                                                                                                                                                                                                                                       |                 |
| 21 |                                 |     |                                                                                                                                                                                                                                                                                                                                       |                 |
| 22 |                                 |     |                                                                                                                                                                                                                                                                                                                                       |                 |
| 23 |                                 | 21b | Description of any interim analyses and stopping guidelines, including who will have access to these interim results and make the final decision to terminate the trial                                                                                                                                                               | <u>n/a</u>      |
| 24 |                                 |     |                                                                                                                                                                                                                                                                                                                                       |                 |
| 25 |                                 |     |                                                                                                                                                                                                                                                                                                                                       |                 |
| 26 | Harms                           | 22  | Plans for collecting, assessing, reporting, and managing solicited and spontaneously reported adverse events and other unintended effects of trial interventions or trial conduct                                                                                                                                                     | <u>n/a</u>      |
| 27 |                                 |     |                                                                                                                                                                                                                                                                                                                                       |                 |
| 28 |                                 |     |                                                                                                                                                                                                                                                                                                                                       |                 |
| 29 | Auditing                        | 23  | Frequency and procedures for auditing trial conduct, if any, and whether the process will be independent from investigators and the sponsor                                                                                                                                                                                           | <u>n/a</u>      |
| 30 |                                 |     |                                                                                                                                                                                                                                                                                                                                       |                 |
| 31 |                                 |     |                                                                                                                                                                                                                                                                                                                                       |                 |
| 32 |                                 |     |                                                                                                                                                                                                                                                                                                                                       |                 |
| 33 | <b>Ethics and dissemination</b> |     |                                                                                                                                                                                                                                                                                                                                       |                 |
| 34 |                                 |     |                                                                                                                                                                                                                                                                                                                                       |                 |
| 35 | Research ethics approval        | 24  | Plans for seeking research ethics committee/institutional review board (REC/IRB) approval                                                                                                                                                                                                                                             | <u>p.15</u>     |
| 36 |                                 |     |                                                                                                                                                                                                                                                                                                                                       |                 |
| 37 |                                 |     |                                                                                                                                                                                                                                                                                                                                       |                 |
| 38 | Protocol amendments             | 25  | Plans for communicating important protocol modifications (eg, changes to eligibility criteria, outcomes, analyses) to relevant parties (eg, investigators, REC/IRBs, trial participants, trial registries, journals, regulators)                                                                                                      | <u>n/a</u>      |
| 39 |                                 |     |                                                                                                                                                                                                                                                                                                                                       |                 |
| 40 |                                 |     |                                                                                                                                                                                                                                                                                                                                       |                 |
| 41 |                                 |     |                                                                                                                                                                                                                                                                                                                                       |                 |
| 42 |                                 |     |                                                                                                                                                                                                                                                                                                                                       |                 |
| 43 |                                 |     |                                                                                                                                                                                                                                                                                                                                       |                 |
| 44 |                                 |     |                                                                                                                                                                                                                                                                                                                                       |                 |
| 45 |                                 |     |                                                                                                                                                                                                                                                                                                                                       |                 |
| 46 |                                 |     |                                                                                                                                                                                                                                                                                                                                       |                 |
| 47 |                                 |     |                                                                                                                                                                                                                                                                                                                                       |                 |
| 48 |                                 |     |                                                                                                                                                                                                                                                                                                                                       |                 |
| 49 |                                 |     |                                                                                                                                                                                                                                                                                                                                       |                 |

|    |                               |     |                                                                                                                                                                                                                                                                                     |                |
|----|-------------------------------|-----|-------------------------------------------------------------------------------------------------------------------------------------------------------------------------------------------------------------------------------------------------------------------------------------|----------------|
| 1  |                               |     |                                                                                                                                                                                                                                                                                     |                |
| 2  |                               |     |                                                                                                                                                                                                                                                                                     |                |
| 3  | Consent or assent             | 26a | Who will obtain informed consent or assent from potential trial participants or authorised surrogates, and how (see Item 32)                                                                                                                                                        | <u>p.15</u>    |
| 4  |                               |     |                                                                                                                                                                                                                                                                                     |                |
| 5  |                               |     |                                                                                                                                                                                                                                                                                     |                |
| 6  |                               | 26b | Additional consent provisions for collection and use of participant data and biological specimens in ancillary studies, if applicable                                                                                                                                               | <u>n/a</u>     |
| 7  |                               |     |                                                                                                                                                                                                                                                                                     |                |
| 8  |                               |     |                                                                                                                                                                                                                                                                                     |                |
| 9  | Confidentiality               | 27  | How personal information about potential and enrolled participants will be collected, shared, and maintained in order to protect confidentiality before, during, and after the trial                                                                                                | <u>p.15</u>    |
| 10 |                               |     |                                                                                                                                                                                                                                                                                     |                |
| 11 |                               |     |                                                                                                                                                                                                                                                                                     |                |
| 12 | Declaration of interests      | 28  | Financial and other competing interests for principal investigators for the overall trial and each study site                                                                                                                                                                       | <u>p.18-19</u> |
| 13 |                               |     |                                                                                                                                                                                                                                                                                     |                |
| 14 |                               |     |                                                                                                                                                                                                                                                                                     |                |
| 15 | Access to data                | 29  | Statement of who will have access to the final trial dataset, and disclosure of contractual agreements that limit such access for investigators                                                                                                                                     | <u>n/a</u>     |
| 16 |                               |     |                                                                                                                                                                                                                                                                                     |                |
| 17 |                               |     |                                                                                                                                                                                                                                                                                     |                |
| 18 | Ancillary and post-trial care | 30  | Provisions, if any, for ancillary and post-trial care, and for compensation to those who suffer harm from trial participation                                                                                                                                                       | <u>n/a</u>     |
| 19 |                               |     |                                                                                                                                                                                                                                                                                     |                |
| 20 |                               |     |                                                                                                                                                                                                                                                                                     |                |
| 21 | Dissemination policy          | 31a | Plans for investigators and sponsor to communicate trial results to participants, healthcare professionals, the public, and other relevant groups (eg, via publication, reporting in results databases, or other data sharing arrangements), including any publication restrictions | <u>p.17</u>    |
| 22 |                               |     |                                                                                                                                                                                                                                                                                     |                |
| 23 |                               |     |                                                                                                                                                                                                                                                                                     |                |
| 24 |                               |     |                                                                                                                                                                                                                                                                                     |                |
| 25 |                               |     |                                                                                                                                                                                                                                                                                     |                |
| 26 |                               | 31b | Authorship eligibility guidelines and any intended use of professional writers                                                                                                                                                                                                      | <u>n/a</u>     |
| 27 |                               |     |                                                                                                                                                                                                                                                                                     |                |
| 28 |                               | 31c | Plans, if any, for granting public access to the full protocol, participant-level dataset, and statistical code                                                                                                                                                                     | <u>n/a</u>     |
| 29 |                               |     |                                                                                                                                                                                                                                                                                     |                |
| 30 | <b>Appendices</b>             |     |                                                                                                                                                                                                                                                                                     |                |
| 31 |                               |     |                                                                                                                                                                                                                                                                                     |                |
| 32 | Informed consent materials    | 32  | Model consent form and other related documentation given to participants and authorised surrogates                                                                                                                                                                                  | <u>n/a</u>     |
| 33 |                               |     |                                                                                                                                                                                                                                                                                     |                |
| 34 |                               |     |                                                                                                                                                                                                                                                                                     |                |
| 35 | Biological specimens          | 33  | Plans for collection, laboratory evaluation, and storage of biological specimens for genetic or molecular analysis in the current trial and for future use in ancillary studies, if applicable                                                                                      | <u>n/a</u>     |
| 36 |                               |     |                                                                                                                                                                                                                                                                                     |                |
| 37 |                               |     |                                                                                                                                                                                                                                                                                     |                |

\*It is strongly recommended that this checklist be read in conjunction with the SPIRIT 2013 Explanation & Elaboration for important clarification on the items. Amendments to the protocol should be tracked and dated. The SPIRIT checklist is copyrighted by the SPIRIT Group under the Creative Commons "[Attribution-NonCommercial-NoDerivs 3.0 Unported](https://creativecommons.org/licenses/by-nc-nd/3.0/)" license.



# BMJ Open

## Implementation and impact of an online tool used in primary care to improve access to financial benefits for patients: A study protocol

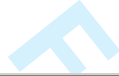

|                                 |                                                                                                                                                                                                                                                                                                                                                                                                                                                                                                                                                                                                                                                                                                                                                                                                                                                                                                                                                                                                                                                                                                                                                                                                                                                    |
|---------------------------------|----------------------------------------------------------------------------------------------------------------------------------------------------------------------------------------------------------------------------------------------------------------------------------------------------------------------------------------------------------------------------------------------------------------------------------------------------------------------------------------------------------------------------------------------------------------------------------------------------------------------------------------------------------------------------------------------------------------------------------------------------------------------------------------------------------------------------------------------------------------------------------------------------------------------------------------------------------------------------------------------------------------------------------------------------------------------------------------------------------------------------------------------------------------------------------------------------------------------------------------------------|
| Journal:                        | <i>BMJ Open</i>                                                                                                                                                                                                                                                                                                                                                                                                                                                                                                                                                                                                                                                                                                                                                                                                                                                                                                                                                                                                                                                                                                                                                                                                                                    |
| Manuscript ID                   | bmjopen-2017-015947.R1                                                                                                                                                                                                                                                                                                                                                                                                                                                                                                                                                                                                                                                                                                                                                                                                                                                                                                                                                                                                                                                                                                                                                                                                                             |
| Article Type:                   | Protocol                                                                                                                                                                                                                                                                                                                                                                                                                                                                                                                                                                                                                                                                                                                                                                                                                                                                                                                                                                                                                                                                                                                                                                                                                                           |
| Date Submitted by the Author:   | 05-May-2017                                                                                                                                                                                                                                                                                                                                                                                                                                                                                                                                                                                                                                                                                                                                                                                                                                                                                                                                                                                                                                                                                                                                                                                                                                        |
| Complete List of Authors:       | Aery , Anjana; Wellesley Institute<br>Rucchetto, Anne; St. Michael's Hospital, Centre for Urban Health Solutions, Upstream Lab<br>Singer , Alexander; University of Manitoba College of Medicine, Department of Family Medicine ; Manitoba Primary Care Research Network<br>Halas , Gayle; University of Manitoba College of Medicine, Family Medicine<br>Bloch, Gary; University of Toronto Faculty of Medicine, Family Medicine ; St. Michael's Hospital, Family and Community Medicine<br>Goel, Ritika ; University of Toronto Faculty of Medicine, Family and Community Medicine<br>Raza, Danyaal; University of Toronto Faculty of Medicine, Family and Community Medicine; St. Michael's Hospital, Family and Community Medicine<br>Upshur, Ross E.G; University of Toronto Faculty of Medicine, Family and Community Medicine<br>Bellaire, Jackie; University of Toronto Faculty of Medicine, Family and Community Medicine; South East Toronto Family Health Team<br>Katz, Alan; University of Manitoba, Community Health Sciences; University of Manitoba, Family Medicine<br>Pinto, Andrew; St. Michael's Hospital, Department of Family and Community Medicine; Upstream Lab, Centre for Urban Health Solutions, St. Michael's Hospital |
| <b>Primary Subject Heading</b>: | General practice / Family practice                                                                                                                                                                                                                                                                                                                                                                                                                                                                                                                                                                                                                                                                                                                                                                                                                                                                                                                                                                                                                                                                                                                                                                                                                 |
| Secondary Subject Heading:      | Health services research, Patient-centred medicine, Medical management, Public health                                                                                                                                                                                                                                                                                                                                                                                                                                                                                                                                                                                                                                                                                                                                                                                                                                                                                                                                                                                                                                                                                                                                                              |
| Keywords:                       | QUALITATIVE RESEARCH, SOCIAL MEDICINE, PREVENTIVE MEDICINE, PRIMARY CARE                                                                                                                                                                                                                                                                                                                                                                                                                                                                                                                                                                                                                                                                                                                                                                                                                                                                                                                                                                                                                                                                                                                                                                           |
|                                 |                                                                                                                                                                                                                                                                                                                                                                                                                                                                                                                                                                                                                                                                                                                                                                                                                                                                                                                                                                                                                                                                                                                                                                                                                                                    |

SCHOLARONE™  
Manuscripts

1  
2  
3  
4  
5  
6  
7  
8  
9  
10  
11  
12  
13  
14  
15  
16  
17  
18  
19  
20  
21  
22  
23  
24  
25  
26  
27  
28  
29  
30  
31  
32  
33  
34  
35  
36  
37  
38  
39  
40  
41  
42  
43  
44  
45  
46  
47  
48  
49  
50  
51  
52  
53  
54  
55  
56  
57  
58  
59  
60

For peer review only

## Implementation and impact of an online tool used in primary care to improve access to financial benefits for patients: A study protocol

### Author Information:

Anjana Aery<sup>1</sup>, Anne Rucchetto<sup>2</sup>, Alexander Singer<sup>3,4</sup>, Gayle Halas<sup>3</sup>, Gary Bloch<sup>5,6</sup>, Ritika Goel<sup>5,7</sup>, Danyaal Raza<sup>5,6</sup>, Ross E.G. Upshur<sup>5,8,9</sup>, Jackie Bellaire<sup>5,10</sup>, Alan Katz<sup>3,4,11</sup>, Andrew D. Pinto<sup>2,5,6,9\*</sup>

1. Wellesley Institute, Toronto, Ontario, Canada
2. The Upstream Lab, Centre for Urban Health Solutions, Li Ka Shing Knowledge Institute, St. Michael's Hospital, Toronto
3. Department of Family Medicine, Faculty of Medicine, University of Manitoba, Winnipeg
4. Manitoba Primary Care Research Network, Winnipeg
5. Department of Family and Community Medicine, Faculty of Medicine, University of Toronto, Toronto
6. Department of Family and Community Medicine, St. Michael's Hospital, Toronto
7. Central Toronto Community Health Centre, Toronto
8. Lunenfeld-Tanenbaum Research Institute, Sinai Health Systems, Toronto
9. Division of Clinical Public Health, Dalla Lana School of Public Health, University of Toronto, Toronto
10. South East Toronto Family Health Team, Toronto
11. Manitoba Centre for Health Policy, Winnipeg

Anjana Aery [anjanaaery@gmail.com](mailto:anjanaaery@gmail.com)

Anne Rucchetto [rucchettoa@smh.ca](mailto:rucchettoa@smh.ca)

Alex Singer [asinger@sbgh.mb.ca](mailto:asinger@sbgh.mb.ca)

Gayle Halas [gayle.halas@umanitoba.ca](mailto:gayle.halas@umanitoba.ca)

Gary Bloch [gary.bloch@utoronto.ca](mailto:gary.bloch@utoronto.ca)

Ritika Goel [ritikagoelto@gmail.com](mailto:ritikagoelto@gmail.com)

Danyaal Raza [razada@smh.ca](mailto:razada@smh.ca)

Ross Upshur [ross.upshur@utoronto.ca](mailto:ross.upshur@utoronto.ca)

Jackie Bellaire [jackie.bellaire@utoronto.ca](mailto:jackie.bellaire@utoronto.ca)

Alan Katz [alan\\_katz@cpe.umanitoba.ca](mailto:alan_katz@cpe.umanitoba.ca)

Andrew D. Pinto [andrew.pinto@utoronto.ca](mailto:andrew.pinto@utoronto.ca)

*\*corresponding author:*

Dr. Andrew Pinto

Mailing address: 410 Sherbourne Street, 4<sup>th</sup> floor, Toronto, Ontario, Canada M4X 1K2

Phone: 416-867-3728

Preferred email: [andrew.pinto@utoronto.ca](mailto:andrew.pinto@utoronto.ca)

**Word Count: 3,378**

## **Abstract**

### **Objectives**

Addressing the social determinants of health of patients has been identified as crucial to reducing health inequities. However, few evidence-based interventions exist. This study emerges from an ongoing collaboration between physicians, researchers and a financial literacy organization. Our objective is to answer the following questions: Is an online tool that improves access to financial benefits feasible and acceptable to primary care clinicians? Can such a tool be integrated into clinic workflow? What are patient perspectives on the tool and what is the short-term impact on access to benefits?

### **Methods**

An advisory group made up of patients living on low incomes and representatives from community agencies supports this study. We will recruit three primary care sites in Toronto, Ontario and three in Winnipeg, Manitoba that serve low-income communities. We will introduce clinicians to screening for poverty and how tax filing and applying for government benefits can increase income. Following this orientation session, health providers will be encouraged to use the tool with any patient seen. The health provider and patient will complete the online tool together, generating a tailored list of benefits, along with community resources to assist with obtaining these benefits. A brief survey on this experience will be administered to patients after they complete the tool, as well as a request to contact them in one month. Those who agree to be contacted will be interviewed on whether the intervention impacted their access to financial

1  
2  
3 benefits. We will also administer an online survey to providers and conduct focus groups at each  
4  
5 site.  
6  
7  
8  
9

## 10 **Discussion**

11  
12 An online tool could support health providers who want to help their patients access financial  
13 benefits, a key component of income security. Our findings will provide insight into the potential  
14 of electronic tools that assist providers to address the social determinants of health.  
15  
16  
17  
18  
19

## 20 **Strengths and Limitations**

- 21 • Multi-site study involving clinics in two provinces.
- 22 • Pragmatic implementation of a novel tool in the real world of busy primary care clinics.
- 23 • Mixed-methods evaluation, using several data sources to triangulate findings.
- 24 • Convenience sampling method for patients.
- 25 • A short follow-up period (4 weeks after intervention) may underestimate the impact of  
26 the novel tool.  
27  
28  
29  
30  
31  
32  
33  
34  
35  
36  
37  
38  
39  
40

## 41 **Trial registration:**

42  
43 Clinicaltrials.gov: [NCT02959866](https://clinicaltrials.gov/ct2/show/study/NCT02959866). Registered Nov 7, 2016. Retrospectively registered.  
44  
45  
46  
47  
48

49 **Keywords:** social determinants of health, income, poverty, primary care, health promotion  
50  
51  
52  
53  
54  
55  
56  
57  
58  
59  
60

## BACKGROUND

The World Health Organization defines the social determinants of health (SDOH) as “the conditions in which people are born, grow, live, work and age”, and include the material resources a person has available that are necessary to live a healthy life [1]. SDOH have been identified as a key reason for health inequities between different individuals and groups within a population, and help explain differences in access to health services [2]. The World Health Organization Commission on Social Determinants of Health, the British Medical Association and the Canadian Medical Association have all called on the health sector to play a greater role in addressing the SDOH through implementing and evaluating new interventions and serving as a link between disadvantaged communities and social and community services [3–6]. Primary care settings in particular are uniquely opportune spaces to take action [7]. Primary care providers follow patients longitudinally, are community-based and often have knowledge of the broader familial and social contexts that shape health and disease [8].

One of the most important SDOH is income security: a person’s actual, perceived and expected income [9, 10]. Income influences the presence and severity of most health conditions. People living in poverty may have difficulty paying rent [11], affording nutritious food [12], affording transportation and engaging with others socially [6–9]. Many studies have shown that economically marginalized people tend to live shorter lives, experience a greater burden of disease and disability and rate their health status as worse than the wealthy [16–21]. One aspect of income security is access to financial benefits.

1  
2  
3  
4  
5  
6  
7  
8  
9  
10  
11  
12  
13  
14  
15  
16  
17  
18  
19  
20  
21  
22  
23  
24  
25  
26  
27  
28  
29  
30  
31  
32  
33  
34  
35  
36  
37  
38  
39  
40  
41  
42  
43  
44  
45  
46  
47  
48  
49  
50  
51  
52  
53  
54  
55  
56  
57  
58  
59  
60

There are currently few, rigorously evaluated SDOH interventions deployed in clinical settings that have been found to improve material conditions and subsequently the health of individuals and families [22, 23]. Welfare benefits advice services within general practices in the United Kingdom have been found to increase the income of recipients, although improvements in health were not assessed in most studies[24]. More recently, several studies in the United States have demonstrated the effectiveness of clinic-based interventions at connecting patients to community resources to address SDOH. In Boston, the Well-child Care Visit, Evaluation, Community Resources, Advocacy, Referral, Education (WE CARE) study took place in pediatric clinics [25]. A waiting room survey screened for social needs and members of the health care team provided information on community resources, adding less than two minutes to the visit. At one month, 20% of the intervention group parents reported contacting a referred community resource versus 2.2% of parents in the control group [26]. The online tool, HelpSteps [27, 28], screens for a much larger number of social needs, taking on average 25 minutes to complete, with 90% of users identifying at least one social need and 96% reporting they would recommend its use to a friend or peer [29]. The California iScreen study[30], also tested in pediatric clinics, used the Health Leads [31] model and found that social needs can be identified and providing patient supports led to improvements in parent-reported child health [32]. In Canada, a paper-based clinical tool has helped train physicians and other health providers to consider poverty as a health issue [33]. This tool has been adapted by the College of Family Physicians of Canada for use in all provinces and territories. No studies to date have evaluated the impact of this tool on providers or patients.

Our study focuses on developing, implementing and evaluating an online tool in primary care settings that focuses on access to financial benefits. This study emerges from an ongoing collaboration between family physicians, researchers and a charitable financial literacy organization, Prosper Canada [34]. This paper describes the protocol for this mixed-methods study that will evaluate the implementation and impact of this online tool. Our study will assess:

- 1) whether health providers find using a tool to address access to financial benefits in a clinical setting feasible and acceptable;
- 2) lessons learned and opportunities identified to integrate the tool within the regular workflow of primary health care organizations;
- 3) feedback from patients using the online tool and the short-term impacts on awareness and access to benefits.

## METHODS/ DESIGN

This study will use qualitative and quantitative methods to evaluate the feasibility and acceptability of using an online tool in primary care to address access to financial benefits. The online income tool will be implemented at six primary care clinics, three in Toronto, Ontario and three in Winnipeg, Manitoba. All sites serve large numbers of patients with complex health needs and low socioeconomic status (Table 1).

*Table 1. Clinic characteristics for 6 primary care sites in Ontario and Manitoba*

| Clinic type | Location | Patient population | Provider(s) who will predominantly administer the tool | Method of recruiting patients |
|-------------|----------|--------------------|--------------------------------------------------------|-------------------------------|
|             |          |                    |                                                        |                               |



|                                                                                                                   |                         |                    |                                                                                                                     |                                                                         |                                                                                                    |
|-------------------------------------------------------------------------------------------------------------------|-------------------------|--------------------|---------------------------------------------------------------------------------------------------------------------|-------------------------------------------------------------------------|----------------------------------------------------------------------------------------------------|
| 1<br>2<br>3<br>4<br>5<br>6<br>7<br>8<br>9<br>10<br>11<br>12<br>13<br>14<br>15<br>16<br>17<br>18<br>19<br>20<br>21 | Family Health Team      | Toronto, Ontario   | Over 30% of patients live in neighbourhoods that have average incomes in the lowest quintile.                       | Family physicians and nurse practitioner                                | Reception staff provide patients an information sheet or health care providers initiate enrollment |
| 22<br>23<br>24<br>25<br>26<br>27<br>28<br>29<br>30<br>31<br>32<br>33                                              | Community Health Centre | Toronto, Ontario   | Priority populations include newcomers and patients with substance use or mental health needs                       | Family physician, nurse practitioners and social workers                | Health care provider initiated                                                                     |
| 34<br>35<br>36<br>37<br>38<br>39<br>40<br>41<br>42<br>43<br>44<br>45<br>46<br>47                                  | Family Health Team      | Toronto, Ontario   | Serves wide range of patients with a focus on the unattached, medically and/or socially complex, high need patients | Family physicians and patient navigator                                 | Health care provider initiated                                                                     |
| 48<br>49<br>50<br>51<br>52<br>53<br>54<br>55<br>56<br>57<br>58<br>59<br>60                                        | Community Health Centre | Winnipeg, Manitoba | Serves one of the most impoverished areas in the city. The neighborhood has an                                      | Family physicians, nurse practitioners, nurses, social workers, support | Health care provider initiated                                                                     |

|                         |                    |                                                                                                                                                                                                                                            |                                                                                             |                                |
|-------------------------|--------------------|--------------------------------------------------------------------------------------------------------------------------------------------------------------------------------------------------------------------------------------------|---------------------------------------------------------------------------------------------|--------------------------------|
|                         |                    | <p>unemployment rate of 17% with 34% of the families living in poverty. There are 83% female lone-parent families and 16.9% of the community are members of a visible minority group with another 29% of Indigenous ancestry.</p>          | workers                                                                                     |                                |
| Community Health Centre | Winnipeg, Manitoba | <p>Serves a diverse inner city community providing a very wide range of services to individuals, families, teens, adults and geriatrics within our geographic community. Special focus for priority populations of marginalized groups</p> | Family physicians, nurse practitioners, nurses, social workers, support workers, counselors | Health care provider initiated |

|                         |                    |                                                                                                                                                          |                                               |                                |
|-------------------------|--------------------|----------------------------------------------------------------------------------------------------------------------------------------------------------|-----------------------------------------------|--------------------------------|
|                         |                    | such as immigrants and refugees, transgendered individuals and those living with STIs.                                                                   |                                               |                                |
| Community Health Centre | Winnipeg, Manitoba | Serves a generally low-income north Winnipeg neighborhood. Focus on patients within the catchment area with particular interest in chronic disease care. | Family physicians, nurse practitioner, nurses | Health care provider initiated |

### Intervention

The intervention is centered on an online tool that guides users through 12 demographic and income-related questions and subsequently generates a customized list of relevant provincial and federal government benefits and tax credits. The initial screening question “Do you ever have difficulty making ends meet at the end of the month?” has been validated in similar settings to identify patients who live below the Canadian poverty line with 98% sensitivity and 64% specificity [35]. Further questions were determined based on the eligibility criteria for various federal and provincial benefits and tax credit programs. The tool was first used at a community health centre and with a family health team in Toronto for one month to identify technical problems. Following feedback sessions with providers, modifications were made to the tool to improve its overall design for use in this study.

## **Study Procedures**

An orientation session will be held at each site to introduce primary care providers to the tool and enroll them in the study as participants. Following this session the tool will be implemented for a 3-month period. The tool can be used by any member of the health care team, including physicians, nurses, nurse practitioners, patient navigators and social workers. Each site will have some flexibility in how the tool will be implemented into the routine workflow of patient care, based on input from providers at the site. Health providers will be encouraged to use the tool with every patient seen. The tool can also be used in an opportunistic way, when patients share a health concern that is linked to low income. Patients who consent to participate in the study can then use the tool with their health provider. At this time, study sites do not have a formal, systematic way to identify low-income patients. To minimize bias by providers or reception staff, all patients who present for care in these clinics will be approached. This intervention was not randomized because excluding low-income patients from receiving information on eligible benefits and accessing additional income supports would be unethical. Moreover, the topic may come up in any given appointment depending on the nature of the visit. Given the limited time during appointments at some sites family physicians will screen patients for low income and refer them to a care coordinator (e.g. social worker) to complete the tool (Figure 1).

### **Figure 1. Implementation and evaluation of an online income tool**

## **Participants**

### *Providers*

1  
2  
3 The 6 clinics testing the tool will introduce the pilot study to health care providers and interested  
4  
5 providers will be consented to participate. We will aim to have a diverse group of health care  
6  
7 professionals use the tool with patients including family physicians, nurse practitioners, social  
8  
9 workers and patient navigators.  
10  
11

### 12 13 14 15 *Patients*

16  
17 All patients seen at the primary care site are eligible to complete the online tool with their  
18  
19 provider. Health providers and clinic staff will inform patients of the study through information  
20  
21 sheets provided at the front desk of clinics or during an appointment. After reviewing the  
22  
23 information sheet, the patient will note that they consent to proceed. To preserve anonymity,  
24  
25 signed consent from patients will not be sought. The inclusion criteria for the one month follow-  
26  
27 up with patients is as follows: used the tool approximately one month ago with their health care  
28  
29 provider, able to provide consent, 18 years old or above, able to converse in English and able to  
30  
31 be reached via telephone or email.  
32  
33  
34  
35  
36  
37  
38

### 39 *Sample Size*

40  
41 The primary aim of this pilot study is to assess the acceptability and feasibility of the  
42  
43 intervention in a clinic setting and assess the short-term impact of the tool on patients. There is  
44  
45 no pre-defined sample for patients completing the tool with their provider. This pilot study will  
46  
47 help determine study sample calculations for future clinical trials and the usage and length of  
48  
49 time to complete the tool will be monitored [36]. Of those patients who complete the tool and  
50  
51 survey, a subset will be contacted for follow-up . The target sample size for one-month follow-up  
52  
53 is 200 patients in each province for a total of 400 patients. We anticipate that this sample size  
54  
55  
56  
57  
58  
59  
60

1  
2  
3 will be robust enough to determine the acceptability of using the tool, as well as provide data on  
4  
5 impact that will allow for sample size calculation for future studies of the impact of such tools on  
6  
7 income itself.  
8  
9

## 10 11 12 Quantitative Data Collection

### 13 14 *Online Tool Output*

15  
16 We will collect a set of data points on each use of the tool. We will not be able to distinguish  
17  
18 repeat users. The tool will record answers to the following demographic questions: age,  
19  
20 immigration status, employment status, whether someone in the household has a disability,  
21  
22 household income and how many people live in the household and any existing benefits or tax  
23  
24 credits received by the patient. The tool will also track clinic site, start time and end time of use,  
25  
26 benefits recommended (output of tool) and proportion of users who complete the tool.  
27  
28  
29  
30  
31  
32  
33

### 34 35 *Patient surveys*

36  
37 At the end of the tool patients will be asked to complete a brief survey on their experience of  
38  
39 using the tool and to provide contact information if interested in being contacted in the future. To  
40  
41 examine the impact of the tool and whether patients learned about new benefits and/or their  
42  
43 financial situation improved a research coordinator will conduct telephone surveys in a subset of  
44  
45 patients that use the tool. Patients will be asked whether the tool is helpful, whether the tool  
46  
47 would be recommended to a friend, whether the information provided was understood and their  
48  
49 level of confidence in taking next steps based on information provided. Since there are no  
50  
51 standardized instruments for evaluating this type of intervention the research team developed  
52  
53  
54  
55  
56  
57  
58  
59  
60

1  
2  
3 surveys. At the end of the tool we will ask patients' permission to contact them via telephone or  
4  
5 email after one month for structured follow-up interviews.  
6  
7  
8  
9

### 10 *Qualitative Data Collection*

#### 11 *Provider focus groups and survey*

12  
13 Three months after participating in the online income tool pilots, providers will be asked to  
14  
15 complete an online, anonymous survey about their experience of using the tool. The purpose of  
16  
17 this survey is to understand the providers' perspective on whether they would use the tool in the  
18  
19 future and whether they would recommend it to a colleague. Providers at each site will also  
20  
21 participate in a focus group discussion that will explore the use of the tool over the last three  
22  
23 months and the barriers and facilitators to implementation. A set of questions will be used to  
24  
25 guide the focus groups and the discussions will be audio-recorded and transcribed verbatim.  
26  
27  
28  
29  
30  
31  
32  
33

#### 34 *Provider observations and feedback*

35  
36 During the three month-period of pilot testing the online income tool at three sites in Winnipeg  
37  
38 and Toronto, respectively, the use of the tool and its accompanying feedback from study team  
39  
40 members and participating staff is being collected on an ongoing basis. Analytics regarding the  
41  
42 number of times the tool is being used at each site are recorded and shared with study team  
43  
44 members on a weekly basis and any feedback shared about the tool in informal conversations  
45  
46 during site visits, through email, or interim reports is noted in a feedback matrix that will be used  
47  
48 when developing the tool in preparation for its next phase of use.  
49  
50  
51  
52  
53  
54

### 55 **ANALYSIS PLAN**



### *Quantitative Analysis*

The primary outcome of this study is the change in knowledge of benefits (assessed through the end of tool patient survey and telephone interview at 4 weeks). An additional patient outcome that will be measured is change in income (assessed at telephone interview at 4 weeks) (Table 2). Descriptive statistics will be calculated (counts, percentages, means) to summarize variables including patient characteristics, usage of the tool and patient outcomes for all six sites. Outcome measures will be dichotomous and a bivariate analysis (using Student t-tests and chi-square tests, as appropriate) will be performed to determine associations between patient characteristics recorded from the tool and outcome measures (e.g., whether program was helpful, whether the patient is confident in taking next steps and whether their financial situation improved). Independent variables associated with positive patient outcomes and negative patient outcomes will be analyzed separately. Logistic regression analysis will be performed to identify variables independently associated with patient outcome measures.

### *Qualitative Analysis*

A secondary outcome that will be assessed in this study is providers' perspectives on the feasibility and acceptability of the tool using qualitative analysis. The field notes and transcripts of the focus groups with providers will be analyzed thematically [37]. An initial coding framework will be developed using the focus group guide. Two team members will independently read and code transcripts using Dedoose 7.0.23 (SocioCultural Research Consultants, Los Angeles, CA). Themes will be refined in an iterative process by comparing codes with the research team and reaching consensus on a final coding framework. The thematic analysis will focus on identifying key facilitators and barriers to implementation and provider

perspectives on the impact of the tool and ways to improve similar tools. Field notes collected throughout the study will help contextualize findings for each site and identify similarities and differences across sites. Open-ended questions from patient and provider surveys will also be thematically coded and categorized. We will identify common experiences associated with using the tool that may provide insight into how the tool works and ways to improve similar tools in the future.

*Table 2 – Main outcome measures for implementation and impact of tool*

| Measure                                | Source   | Method of data collection       | Domain        | Time point                 |
|----------------------------------------|----------|---------------------------------|---------------|----------------------------|
| Change in knowledge of benefits        | Patient  | Patient follow-up survey        | Effectiveness | 1 month                    |
| Change in access to financial benefits | Patient  | Patient follow-up survey        | Effectiveness | 1 month                    |
| Acceptability of tool                  | Provider | Provider focus group and survey | Acceptability | After 3 month study period |
| Feasibility of tool                    | Provider | Provider focus group and survey | Feasibility   | After 3 month study period |

### *Advisory group*

We will organize an advisory committee made of up patients, community agencies and staff to provide ongoing feedback on the project. Our aim is to engage 4-6 patients to provide input on how to improve the online tool and its use in clinical settings. For this study the advisory committee will play an important role in understanding how to improve the tool interface and what information will be most useful for patients to improve the tool output. The advisory committee will meet approximately once a month beginning in July 2016 until the end of data collection to help interpret findings, make recommendations to the online tool and suggestions for integrating its use within the care team. Ongoing engagement with patients and stakeholders will help to determine modifications to the tool, contextualize our findings and promote greater uptake in the future [38].

### *Ethical considerations*

This study has been approved by St. Michael's Hospital Research Ethics Board, the Health Research Ethics Board at the University of Manitoba, and the Michael Garron Hospital Research Ethics Board. Informed consent will be obtained for all study participants. Data collected by the online tool will be anonymous, with no link between answers to questions in the tool and personal identifying data. It is possible that some patients may feel discomfort when asked the screening question and they may feel shame or fear stigma if they are experiencing income insecurity. We will attempt to lessen this possibility by encouraging health providers to normalize the experience for patients, e.g., "I'm asking all of my patients this question over the next 3 months". All patient and provider surveys will be anonymized. Finally, participants in

1  
2  
3 focus groups will not be identified by name and all transcripts will be anonymized during  
4  
5 transcription.  
6  
7  
8  
9

## 10 **DISCUSSION**

11  
12 This study uses an upstream approach to address a root cause of poor health outcomes: poverty.  
13  
14 By exploring the feasibility and acceptability of using an online tool we can establish a  
15  
16 standardized process to screen patients for low income in routine primary care settings. We will  
17  
18 also examine and report on local factors that influence implementation at the different clinic  
19  
20 sites. Moreover, the implementation of the tool will be pragmatic, with the ultimate aim to bring  
21  
22 such tools into broader practice through integration into primary healthcare settings. The findings  
23  
24 from this study will provide insight into individual-level interventions to address the social  
25  
26 determinants of health in primary care. Such tools may be useful to a diversity of primary care  
27  
28 providers and could be applicable to other health care settings, such as in discharge planning at  
29  
30 health care institutions. Important strengths of the intervention include opportunities for  
31  
32 providers to offer feedback on the content, design and overall usability of the tool and the  
33  
34 follow-up with patients about changes in their financial situation. Patients and community  
35  
36 agencies represented in the advisory group will help ensure that this study remains focused on  
37  
38 patient-centred outcomes and experiences and will contribute particular perspectives to the  
39  
40 interpretation of our findings.  
41  
42  
43  
44  
45  
46  
47  
48  
49

50 We will evaluate the implementation and short-term effects of this online income security tool  
51  
52 within six health clinics. We will attempt to engage a broad representation of health providers at  
53  
54 each site and will invite all staff to participate in our study. The information provided in the  
55  
56  
57  
58  
59  
60

1  
2  
3 output of the tool may not be suitably tailored to the needs of all individuals. The time frame of  
4  
5 this study does not permit us to examine health effects, which we would anticipate would take  
6  
7 longer than one month to develop, and which would require a more intense intervention. Future  
8  
9 research could examine whether using this tool, in coordination with other services, with patients  
10  
11 identified as being at risk of developing complex health and social needs could impact on health  
12  
13 and health service use [2, 39]. The hypothesis tested would be that that addressing income  
14  
15 security may reduce the risk of poor health and high service use for some patients.  
16  
17  
18  
19

20  
21  
22 There are several limitations to the proposed the study. First, the study uses a convenience  
23  
24 sampling method so participates who declined to use tool or could not be reached at follow up  
25  
26 were not captured. Second, the sites chosen to pilot the tool were already interested in addressing  
27  
28 income security at there clinics and all site materials were in English so findings may not be  
29  
30 generalizable for other clinic settings. Lastly, while we anticipate that the tool will be able to  
31  
32 identify benefits that a patient could be eligible for, the complex process of applying for benefits  
33  
34 may be a barrier to improving income security and a 1 month follow-up may be a short time  
35  
36 frame to assess impact. However, this is one of the few studies on SDOH interventions that  
37  
38 follows up with patients and a major strength is implementing the tool across multiple sites in  
39  
40 two provinces.  
41  
42  
43  
44  
45  
46  
47

48 This study is timely as awareness and a commitment to act on the SDOH is growing within the  
49  
50 health sector in Canada [6, 22, 40, 41] and globally [42–44]. Continuing medical education  
51  
52 events on poverty and health have been established and new medical school curricula is being  
53  
54 created[45]. These efforts may begin to change medical practice. Yet, there are few studies that  
55  
56  
57  
58  
59  
60

1  
2  
3 have evaluated the implementation and impact of such initiatives. The findings of this study will  
4  
5 contribute to the design of SDOH interventions in health care, particularly when consider the  
6  
7 role of technology and the practical challenges of incorporating interventions into busy health  
8  
9 organizations.  
10  
11  
12  
13  
14  
15  
16  
17  
18  
19  
20  
21  
22  
23  
24  
25  
26  
27  
28  
29  
30  
31  
32  
33  
34  
35  
36  
37  
38  
39  
40  
41  
42  
43  
44  
45  
46  
47  
48  
49  
50  
51  
52  
53  
54  
55  
56  
57  
58  
59  
60

For peer review only

### **List of abbreviations**

SDOH social determinants of health

WE CARE Well-child Care Visit, Evaluation, Community Resources, Advocacy, Referral,  
Education

### **Declarations**

#### **Ethics approval and consent to participate**

This study was approved by the St. Michael's Hospital Research Ethics Board (15-353), the Health Research Ethics Board at the University of Manitoba (HS19275:H2016:019) and the Michael Garron Hospital Research Ethics Board (691-1608-Mis-298).

#### **Consent for publication**

Not applicable.

#### **Availability of data and material**

The datasets generated and analyzed during the current study are not publicly available due to the requirements of the various Research Ethics Boards, but are available from the corresponding author on reasonable request.

#### **Competing interests**

1  
2  
3 The authors declare that they have no competing interests.  
4  
5  
6  
7

## 8 **Funding**

9  
10 This study was supported by the Canadian Institutes of Health Research (FRN: 142877), Intuit  
11 Foundation, Research Manitoba and the St. Michael's Hospital Foundation. None of the funders  
12 played any role in the design of the study, data collection, data analysis, interpretation of data or  
13 in writing or editing this manuscript.  
14  
15  
16  
17  
18  
19

## 20 **Authors' contributions**

21  
22 ADP conceived the study. AS, GH, GB, RG, DR, REG, AK and ADP provided key inputs into  
23 the design of the study and refinements of the protocol. AA, AR and ADP assisted in the writing  
24 of the first draft of the manuscript. ADP, AS, GH, GB, RG, REG and AK assisted with obtaining  
25 funding for the study. AA, AR, AS, GH, GB, RG, DR, REG, JB, AK and ADP contributed to  
26 critical revisions and editing the manuscript for important intellectual content and approved the  
27 final manuscript. ADP had full access to all the information present and takes responsibility for  
28 the accuracy of this paper.  
29  
30  
31  
32  
33  
34  
35  
36  
37  
38  
39  
40  
41  
42

## 43 **Acknowledgements**

44  
45 We gratefully acknowledge all our collaborators at Prosper Canada, particularly Adam Fair,  
46 Marlene Chiarotto and Layla Rich, without whom this work would not be possible. We also  
47 acknowledge the input of our Income and Health Advisory Group members.  
48  
49  
50  
51  
52  
53  
54  
55  
56  
57  
58  
59  
60



## References

1. World Health Organization. Commission on Social Determinants of Health. Closing the gap in a generation: health equity through action on the social determinants of health. Geneva: 2008.
2. Rosella LC, Fitzpatrick T, Wodchis WP, Calzavara A, Manson H, Goel V. High-cost health care users in Ontario, Canada: demographic, socio-economic, and health status characteristics. *BMC Health Serv Res.* 2014;14:532. doi:10.1186/s12913-014-0532-2.
3. Baum FE, Legge DG, Freeman T, Lawless A, Labonte, R, Jolley GM. The potential for multi-disciplinary primary health care services to take action on the social determinants of health: actions and constraints. *BMC Public Health.* 2013;13:1–13. <http://dx.doi.org/10.1186/1471-2458-13-460>.
4. Maeseneer J, Willems S, De Sutter A, Van de Geuchte I, Billings M. Primary health care as a strategy for achieving equitable care: a literature review commissioned by the Health Systems Knowledge Network. 2007. [www.who.int/social\\_determinants/resources/csdh\\_media/primary\\_health\\_care\\_2007\\_en.pdf](http://www.who.int/social_determinants/resources/csdh_media/primary_health_care_2007_en.pdf).
5. British Medical Association. Social determinants of health - what doctors can do. London: 2011.
6. Canadian Medical Association. Physicians and health equity: opportunities in practice. Ottawa: 2013.
7. Hassan A, Scherer EA, Pikcilingis A, Krull E, McNickles L, Marmon G, et al. Improving Social Determinants of Health: Effectiveness of a Web-Based Intervention. *Am J Prev Med.* 2015;49:822–31. doi:10.1016/j.amepre.2015.04.023.
8. Kiran T, Pinto AD. Swimming “upstream ” to tackle the social determinants of health. *BMJ Qual Saf.* 2016;25 January:138–140.

- 1  
2  
3 9. Adler N, Ostrove J. Socioeconomic status and health : what we know and what we don ' t .  
4  
5 PubMed Commons. *Ann N Y Acad Sci.* 1999;896:3–15.  
6
- 7  
8 10. Adler NE, Stewart J. Health disparities across the lifespan: Meaning, methods, and  
9  
10 mechanisms. *Ann N Y Acad Sci.* 2010;1186:5–23.  
11
- 12  
13 11. Hwang SW. Homelessness and health. *Can Med Assoc J .* 2001;164:229–33.  
14
- 15  
16 12. Tarasuk V, Cheng J, de Oliveria C, Dachner N, Gunderson C, Kurdyak P. Association  
17  
18 between household food insecurity and annual health care costs. *Can Med Assoc J.* 2015;;1–8.  
19
- 20  
21 13. Kennedy G. Food for all. *C Can Med Assoc J.* 2007;177:1473.  
22
- 23  
24 14. Vozoris NT, Tarasuk VS. Household food insufficiency is associated with poorer health. *J*  
25  
26 *Nutr.* 2003;133:120–6.  
27
- 28  
29 15. Che J, Chen J. Food insecurity in Canadian households. *Health Reports* 2001;12:11–22.  
30
- 31  
32 16. Bartley M, Blane D, Davey Smith G. Introduction: Beyond the Black Report. *Sociol Health*  
33  
34 *Illn.* 1998;20:563–77. doi:10.1111/1467-9566.00119.  
35
- 36  
37 17. Marmot M, Wilkinson RG. Psychosocial and material pathways in the relation between  
38  
39 income and health: a response to Lynch et al. *BMJ.* 2001;322:1233–6.  
40
- 41  
42 18. Ferrie JE, Shipley MJ, Davey Smith G, Stansfeld SA, Marmot MG. Change in health  
43  
44 inequalities among British civil servants: the Whitehall II study. *J Epidemiol Community Health.*  
45  
46 2002;56:922–6.  
47
- 48  
49 19. Marmot MG, Shipley MJ. Do socioeconomic differences in mortality persist after  
50  
51 retirement? 25 year follow up of civil servants from the first Whitehall study. *BMJ.*  
52  
53 1996;313:1177–80.  
54
- 55  
56 20. Acheson D. The Acheson Report. In: Purdy, M. Banks D, editor. *The sociology and politics*  
57  
58 *of health: A reader.* London: Routledge; 2001. p. 111–22.  
59  
60

- 1  
2  
3 21. Wilkinson RG, Pickett KE. Income inequality and population health: A review and  
4 explanation of the evidence. *Social Science and Medicine*. 2006;62:1768–84.  
5  
6
- 7 22. Buchman S. Screening for poverty in family practice. *Can Fam Physician*. 2012;58:709.  
8  
9
- 10 23. Andermann A. Taking action on the social determinants of health in clinical practice: a  
11 framework for health professionals. *Can Med Assoc J*. 2016.  
12  
13
- 14 24. Adams J, White M, Moffatt S, Howel D, Mackintosh J. A systematic review of the health,  
15 social and financial impacts of welfare rights advice delivered in healthcare settings. *BMC*  
16 *Public Health*. 2006;6:81. doi:10.1186/1471-2458-6-81.  
17  
18
- 19 25. Garg A, Toy S, Tripodis Y, Silverstein M, Freeman E. Addressing social determinants of  
20 health at well child care visits: a cluster RCT. *Pediatrics*. 2015;135:e296-304.  
21  
22  
23  
24  
25  
26  
27  
28  
29  
30  
31  
32  
33  
34  
35  
36  
37  
38  
39  
40  
41  
42  
43  
44  
45  
46  
47  
48  
49  
50  
51  
52  
53  
54  
55  
56  
57  
58  
59  
60  
doi:10.1542/peds.2014-2888.
26. Garg A, Butz AM, Dworkin PH, Lewis RA, Thompson RE, Serwint JR. Improving the  
management of family psychosocial problems at low-income children’s well-child care visits:  
the WE CARE Project. *Pediatrics*. 2007;120:547–58.
27. Boston Children’s Hospital. HelpSteps. 2016. <http://www.helpsteps.com>. Accessed 10 Jun  
2016.
28. Fleegler EW, Lieu TA, Wise PH, Muret-Wagstaff S. Families’ Health-Related Social  
Problems and Missed Referral Opportunities. *Pediatrics*. 2007;119:e1332–41.  
doi:10.1542/peds.2006-1505.
29. Wylie S a, Hassan A, Krull EG, Pikcilingis AB, Corliss HL, Woods ER, et al. Assessing and  
referring adolescents’ health-related social problems: qualitative evaluation of a novel web-based  
approach. *J Telemed Telecare*. 2012;18:392–8. doi:10.1258/jtt.2012.120214.
30. Gottlieb L, Hessler D, Long D, Amaya A, Adler N. A Randomized Trial on Screening for

1  
2  
3 Social Determinants of Health: the iScreen Study. *Pediatrics*. 2014;134. doi:10.1542/peds.2014-  
4  
5 1439.

6  
7  
8 31. Health Leads. Our impact on healthcare. April 12, 2013.

9  
10 32. Gottlieb LM, Hessler D, Long D, Laves E, Burns AR, Amaya A, et al. Effects of Social  
11  
12 Needs Screening and In-Person Service Navigation on Child Health. *JAMA Pediatr*.  
13  
14 2016;124:e162521. doi:10.1001/jamapediatrics.2016.2521.

15  
16  
17 33. Bloch G. Poverty: A clinical tool for primary care in Ontario.  
18  
19 <http://effectivepractice.org/resources/poverty-a-clinical-tool-for-primary-care/>. Accessed 12 Jun  
20  
21 2016.

22  
23  
24 34. Prosper Canada. 2016. <http://prospercanada.org/About-Us/Overview.aspx>. Accessed 10 Jun  
25  
26 2016.

27  
28  
29 35. Brcic V, Eberdt C, Kaczorowski J. Development of a tool to identify poverty in a family  
30  
31 practice setting: a pilot study. *International journal of family medicine*. 2011;2011.

32  
33  
34 36. Thabane L, Ma J, Chu R, Cheng J, Ismaila A, Rios LP, et al. A tutorial on pilot studies: the  
35  
36 what, why and how. *BMC Med Res Methodol*. 2010;10:1.

37  
38  
39 37. Braun V, Clarke V. Using thematic analysis in psychology. *Qual Res Psychol*. 2006;3 May  
40  
41 2015:77–101.

42  
43  
44 38. Ayala GX, Elder JP. Qualitative methods to ensure acceptability of behavioral and social  
45  
46 interventions to the target population. *J Public Health Dent*. 2011;71 SUPPL. 1:1–17.

47  
48  
49 39. Fitzpatrick T, Rosella LC, Calzavara A, Petch J, Pinto AD, Manson H, et al. Looking Beyond  
50  
51 Income and Education. *Am J Prev Med*. 2015;:1–11. doi:10.1016/j.amepre.2015.02.018.

52  
53 40. Best advice - Social determinants of health. 2015.

54  
55 41. Pinto AD, Glattstein-Young G, Mohamed A, Bloch G, Leung F-H, Glazier RH. Building a  
56  
57  
58  
59  
60

1  
2  
3 Foundation to Reduce Health Inequities: Routine Collection of Sociodemographic Data in  
4 Primary Care. *J Am Board Fam Med*. 2016;29:348–55. doi:10.3122/jabfm.2016.03.150280.  
5  
6

7  
8 42. Gottlieb L, Sandel M, Adler NE. Collecting and applying data on social determinants of  
9 health in health care settings. *JAMA Internal Medicine*. 2013;173:1017–20.  
10

11 <http://dx.doi.org/10.1001/jamainternmed.2013.560>.  
12

13  
14 43. Gottlieb LM, Tirozzi KJ, Manchanda R, Burns AR, Sandel MT. Moving electronic medical  
15 records upstream: Incorporating social determinants of health. *American Journal of Preventive*  
16 *Medicine*. 2015;48:215–8. doi:10.1016/j.amepre.2014.07.009.  
17  
18

19  
20 44. Garg A, Dworkin PH. Surveillance and Screening for Social Determinants of Health: The  
21 Medical Home and Beyond. *JAMA Pediatr*. 2016;170:189--90.  
22  
23

24  
25 45. Ontario College of Family Physicians. Primary care interventions in poverty. 2016.  
26  
27

28 <http://ocfp.on.ca/cpd/povertytool>. Accessed 7 Nov 2016.  
29  
30  
31  
32  
33  
34  
35  
36  
37  
38  
39  
40  
41  
42  
43  
44  
45  
46  
47  
48  
49  
50  
51  
52  
53  
54  
55  
56  
57  
58  
59  
60

Figure 1. Implementation and evaluation of an online income tool

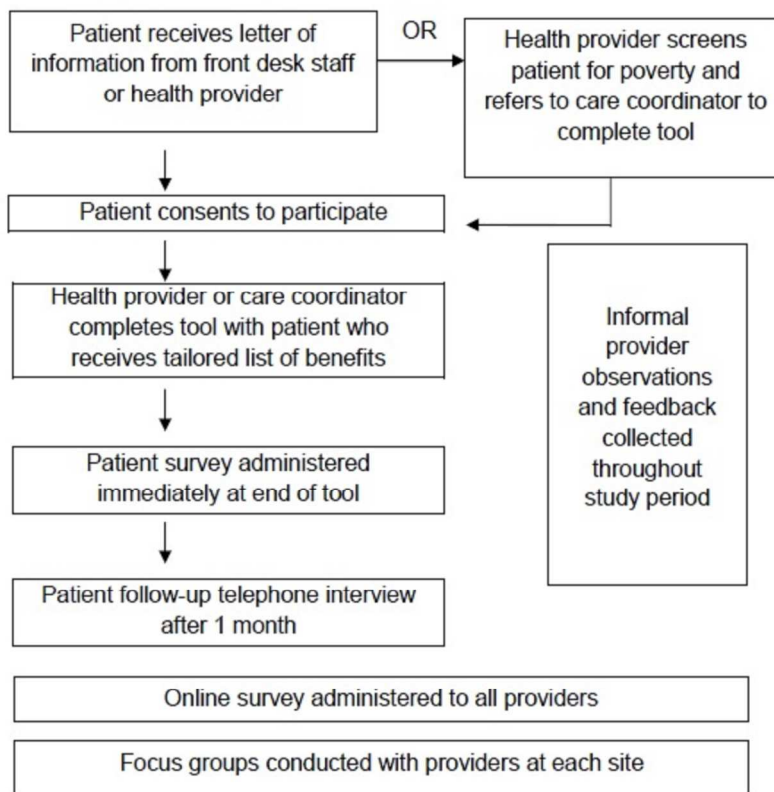

231x252mm (300 x 300 DPI)

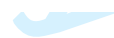



## Introduction

|                          |    |                                                                                                                                                                                                           |              |
|--------------------------|----|-----------------------------------------------------------------------------------------------------------------------------------------------------------------------------------------------------------|--------------|
| Background and rationale | 6a | Description of research question and justification for undertaking the trial, including summary of relevant studies (published and unpublished) examining benefits and harms for each intervention        | <u>p.4-6</u> |
|                          | 6b | Explanation for choice of comparators                                                                                                                                                                     | <u>n/a</u>   |
| Objectives               | 7  | Specific objectives or hypotheses                                                                                                                                                                         | <u>p.5-6</u> |
| Trial design             | 8  | Description of trial design including type of trial (eg, parallel group, crossover, factorial, single group), allocation ratio, and framework (eg, superiority, equivalence, noninferiority, exploratory) | <u>p.6</u>   |

## Methods: Participants, interventions, and outcomes

|                      |     |                                                                                                                                                                                                                                                                                                                                                                                |                       |
|----------------------|-----|--------------------------------------------------------------------------------------------------------------------------------------------------------------------------------------------------------------------------------------------------------------------------------------------------------------------------------------------------------------------------------|-----------------------|
| Study setting        | 9   | Description of study settings (eg, community clinic, academic hospital) and list of countries where data will be collected. Reference to where list of study sites can be obtained                                                                                                                                                                                             | <u>p.6-9</u>          |
| Eligibility criteria | 10  | Inclusion and exclusion criteria for participants. If applicable, eligibility criteria for study centres and individuals who will perform the interventions (eg, surgeons, psychotherapists)                                                                                                                                                                                   | <u>p.11</u>           |
| Interventions        | 11a | Interventions for each group with sufficient detail to allow replication, including how and when they will be administered                                                                                                                                                                                                                                                     | <u>p.9-10</u>         |
|                      | 11b | Criteria for discontinuing or modifying allocated interventions for a given trial participant (eg, drug dose change in response to harms, participant request, or improving/worsening disease)                                                                                                                                                                                 | <u>n/a</u>            |
|                      | 11c | Strategies to improve adherence to intervention protocols, and any procedures for monitoring adherence (eg, drug tablet return, laboratory tests)                                                                                                                                                                                                                              | <u>n/a</u>            |
|                      | 11d | Relevant concomitant care and interventions that are permitted or prohibited during the trial                                                                                                                                                                                                                                                                                  | <u>n/a</u>            |
| Outcomes             | 12  | Primary, secondary, and other outcomes, including the specific measurement variable (eg, systolic blood pressure), analysis metric (eg, change from baseline, final value, time to event), method of aggregation (eg, median, proportion), and time point for each outcome. Explanation of the clinical relevance of chosen efficacy and harm outcomes is strongly recommended | <u>p.14-15</u>        |
| Participant timeline | 13  | Time schedule of enrolment, interventions (including any run-ins and washouts), assessments, and visits for participants. A schematic diagram is highly recommended (see Figure)                                                                                                                                                                                               | <u>p.10-11, Fig 1</u> |



1  
2  
3 Sample size 14 Estimated number of participants needed to achieve study objectives and how it was determined, including n/a  
4 clinical and statistical assumptions supporting any sample size calculations

5  
6 Recruitment 15 Strategies for achieving adequate participant enrolment to reach target sample size n/a  
7

8 **Methods: Assignment of interventions (for controlled trials)**  
9

10 Allocation:

11  
12 Sequence generation 16a Method of generating the allocation sequence (eg, computer-generated random numbers), and list of any n/a  
13 factors for stratification. To reduce predictability of a random sequence, details of any planned restriction  
14 (eg, blocking) should be provided in a separate document that is unavailable to those who enrol participants  
15 or assign interventions

16  
17 Allocation concealment mechanism 16b Mechanism of implementing the allocation sequence (eg, central telephone; sequentially numbered, n/a  
18 opaque, sealed envelopes), describing any steps to conceal the sequence until interventions are assigned  
19

20 Implementation 16c Who will generate the allocation sequence, who will enrol participants, and who will assign participants to n/a  
21 interventions

22 Blinding (masking) 17a Who will be blinded after assignment to interventions (eg, trial participants, care providers, outcome n/a  
23 assessors, data analysts), and how  
24

25  
26 17b If blinded, circumstances under which unblinding is permissible, and procedure for revealing a participant's n/a  
27 allocated intervention during the trial  
28  
29  
30  
31

32 **Methods: Data collection, management, and analysis**  
33

34 Data collection methods 18a Plans for assessment and collection of outcome, baseline, and other trial data, including any related p. 11-12  
35 processes to promote data quality (eg, duplicate measurements, training of assessors) and a description of  
36 study instruments (eg, questionnaires, laboratory tests) along with their reliability and validity, if known.  
37 Reference to where data collection forms can be found, if not in the protocol  
38

39 18b Plans to promote participant retention and complete follow-up, including list of any outcome data to be p. 10-11  
40 collected for participants who discontinue or deviate from intervention protocols  
41  
42  
43  
44  
45

|    |                                 |     |                                                                                                                                                                                                                                                                                                                                       |                 |
|----|---------------------------------|-----|---------------------------------------------------------------------------------------------------------------------------------------------------------------------------------------------------------------------------------------------------------------------------------------------------------------------------------------|-----------------|
| 1  |                                 |     |                                                                                                                                                                                                                                                                                                                                       |                 |
| 2  |                                 |     |                                                                                                                                                                                                                                                                                                                                       |                 |
| 3  | Data management                 | 19  | Plans for data entry, coding, security, and storage, including any related processes to promote data quality (eg, double data entry; range checks for data values). Reference to where details of data management procedures can be found, if not in the protocol                                                                     | <u>p. 11-12</u> |
| 4  |                                 |     |                                                                                                                                                                                                                                                                                                                                       |                 |
| 5  |                                 |     |                                                                                                                                                                                                                                                                                                                                       |                 |
| 6  |                                 |     |                                                                                                                                                                                                                                                                                                                                       |                 |
| 7  | Statistical methods             | 20a | Statistical methods for analysing primary and secondary outcomes. Reference to where other details of the statistical analysis plan can be found, if not in the protocol                                                                                                                                                              | <u>p. 13-15</u> |
| 8  |                                 |     |                                                                                                                                                                                                                                                                                                                                       |                 |
| 9  |                                 |     |                                                                                                                                                                                                                                                                                                                                       |                 |
| 10 |                                 | 20b | Methods for any additional analyses (eg, subgroup and adjusted analyses)                                                                                                                                                                                                                                                              | <u>n/a</u>      |
| 11 |                                 |     |                                                                                                                                                                                                                                                                                                                                       |                 |
| 12 |                                 | 20c | Definition of analysis population relating to protocol non-adherence (eg, as randomised analysis), and any statistical methods to handle missing data (eg, multiple imputation)                                                                                                                                                       | <u>n/a</u>      |
| 13 |                                 |     |                                                                                                                                                                                                                                                                                                                                       |                 |
| 14 |                                 |     |                                                                                                                                                                                                                                                                                                                                       |                 |
| 15 |                                 |     |                                                                                                                                                                                                                                                                                                                                       |                 |
| 16 | <b>Methods: Monitoring</b>      |     |                                                                                                                                                                                                                                                                                                                                       |                 |
| 17 |                                 |     |                                                                                                                                                                                                                                                                                                                                       |                 |
| 18 | Data monitoring                 | 21a | Composition of data monitoring committee (DMC); summary of its role and reporting structure; statement of whether it is independent from the sponsor and competing interests; and reference to where further details about its charter can be found, if not in the protocol. Alternatively, an explanation of why a DMC is not needed | <u>n/a</u>      |
| 19 |                                 |     |                                                                                                                                                                                                                                                                                                                                       |                 |
| 20 |                                 |     |                                                                                                                                                                                                                                                                                                                                       |                 |
| 21 |                                 |     |                                                                                                                                                                                                                                                                                                                                       |                 |
| 22 |                                 |     |                                                                                                                                                                                                                                                                                                                                       |                 |
| 23 |                                 | 21b | Description of any interim analyses and stopping guidelines, including who will have access to these interim results and make the final decision to terminate the trial                                                                                                                                                               | <u>n/a</u>      |
| 24 |                                 |     |                                                                                                                                                                                                                                                                                                                                       |                 |
| 25 |                                 |     |                                                                                                                                                                                                                                                                                                                                       |                 |
| 26 | Harms                           | 22  | Plans for collecting, assessing, reporting, and managing solicited and spontaneously reported adverse events and other unintended effects of trial interventions or trial conduct                                                                                                                                                     | <u>n/a</u>      |
| 27 |                                 |     |                                                                                                                                                                                                                                                                                                                                       |                 |
| 28 |                                 |     |                                                                                                                                                                                                                                                                                                                                       |                 |
| 29 | Auditing                        | 23  | Frequency and procedures for auditing trial conduct, if any, and whether the process will be independent from investigators and the sponsor                                                                                                                                                                                           | <u>n/a</u>      |
| 30 |                                 |     |                                                                                                                                                                                                                                                                                                                                       |                 |
| 31 |                                 |     |                                                                                                                                                                                                                                                                                                                                       |                 |
| 32 |                                 |     |                                                                                                                                                                                                                                                                                                                                       |                 |
| 33 | <b>Ethics and dissemination</b> |     |                                                                                                                                                                                                                                                                                                                                       |                 |
| 34 |                                 |     |                                                                                                                                                                                                                                                                                                                                       |                 |
| 35 | Research ethics approval        | 24  | Plans for seeking research ethics committee/institutional review board (REC/IRB) approval                                                                                                                                                                                                                                             | <u>p.15</u>     |
| 36 |                                 |     |                                                                                                                                                                                                                                                                                                                                       |                 |
| 37 |                                 |     |                                                                                                                                                                                                                                                                                                                                       |                 |
| 38 | Protocol amendments             | 25  | Plans for communicating important protocol modifications (eg, changes to eligibility criteria, outcomes, analyses) to relevant parties (eg, investigators, REC/IRBs, trial participants, trial registries, journals, regulators)                                                                                                      | <u>n/a</u>      |
| 39 |                                 |     |                                                                                                                                                                                                                                                                                                                                       |                 |
| 40 |                                 |     |                                                                                                                                                                                                                                                                                                                                       |                 |
| 41 |                                 |     |                                                                                                                                                                                                                                                                                                                                       |                 |
| 42 |                                 |     |                                                                                                                                                                                                                                                                                                                                       |                 |
| 43 |                                 |     |                                                                                                                                                                                                                                                                                                                                       |                 |
| 44 |                                 |     |                                                                                                                                                                                                                                                                                                                                       |                 |
| 45 |                                 |     |                                                                                                                                                                                                                                                                                                                                       |                 |
| 46 |                                 |     |                                                                                                                                                                                                                                                                                                                                       |                 |
| 47 |                                 |     |                                                                                                                                                                                                                                                                                                                                       |                 |
| 48 |                                 |     |                                                                                                                                                                                                                                                                                                                                       |                 |
| 49 |                                 |     |                                                                                                                                                                                                                                                                                                                                       |                 |

|    |                               |     |                                                                                                                                                                                                                                                                                     |                |
|----|-------------------------------|-----|-------------------------------------------------------------------------------------------------------------------------------------------------------------------------------------------------------------------------------------------------------------------------------------|----------------|
| 1  |                               |     |                                                                                                                                                                                                                                                                                     |                |
| 2  |                               |     |                                                                                                                                                                                                                                                                                     |                |
| 3  | Consent or assent             | 26a | Who will obtain informed consent or assent from potential trial participants or authorised surrogates, and how (see Item 32)                                                                                                                                                        | <u>p.15</u>    |
| 4  |                               |     |                                                                                                                                                                                                                                                                                     |                |
| 5  |                               |     |                                                                                                                                                                                                                                                                                     |                |
| 6  |                               | 26b | Additional consent provisions for collection and use of participant data and biological specimens in ancillary studies, if applicable                                                                                                                                               | <u>n/a</u>     |
| 7  |                               |     |                                                                                                                                                                                                                                                                                     |                |
| 8  |                               |     |                                                                                                                                                                                                                                                                                     |                |
| 9  | Confidentiality               | 27  | How personal information about potential and enrolled participants will be collected, shared, and maintained in order to protect confidentiality before, during, and after the trial                                                                                                | <u>p.15</u>    |
| 10 |                               |     |                                                                                                                                                                                                                                                                                     |                |
| 11 |                               |     |                                                                                                                                                                                                                                                                                     |                |
| 12 | Declaration of interests      | 28  | Financial and other competing interests for principal investigators for the overall trial and each study site                                                                                                                                                                       | <u>p.18-19</u> |
| 13 |                               |     |                                                                                                                                                                                                                                                                                     |                |
| 14 |                               |     |                                                                                                                                                                                                                                                                                     |                |
| 15 | Access to data                | 29  | Statement of who will have access to the final trial dataset, and disclosure of contractual agreements that limit such access for investigators                                                                                                                                     | <u>n/a</u>     |
| 16 |                               |     |                                                                                                                                                                                                                                                                                     |                |
| 17 |                               |     |                                                                                                                                                                                                                                                                                     |                |
| 18 | Ancillary and post-trial care | 30  | Provisions, if any, for ancillary and post-trial care, and for compensation to those who suffer harm from trial participation                                                                                                                                                       | <u>n/a</u>     |
| 19 |                               |     |                                                                                                                                                                                                                                                                                     |                |
| 20 |                               |     |                                                                                                                                                                                                                                                                                     |                |
| 21 | Dissemination policy          | 31a | Plans for investigators and sponsor to communicate trial results to participants, healthcare professionals, the public, and other relevant groups (eg, via publication, reporting in results databases, or other data sharing arrangements), including any publication restrictions | <u>p.17</u>    |
| 22 |                               |     |                                                                                                                                                                                                                                                                                     |                |
| 23 |                               |     |                                                                                                                                                                                                                                                                                     |                |
| 24 |                               |     |                                                                                                                                                                                                                                                                                     |                |
| 25 |                               |     |                                                                                                                                                                                                                                                                                     |                |
| 26 |                               | 31b | Authorship eligibility guidelines and any intended use of professional writers                                                                                                                                                                                                      | <u>n/a</u>     |
| 27 |                               |     |                                                                                                                                                                                                                                                                                     |                |
| 28 |                               | 31c | Plans, if any, for granting public access to the full protocol, participant-level dataset, and statistical code                                                                                                                                                                     | <u>n/a</u>     |
| 29 |                               |     |                                                                                                                                                                                                                                                                                     |                |
| 30 | <b>Appendices</b>             |     |                                                                                                                                                                                                                                                                                     |                |
| 31 |                               |     |                                                                                                                                                                                                                                                                                     |                |
| 32 | Informed consent materials    | 32  | Model consent form and other related documentation given to participants and authorised surrogates                                                                                                                                                                                  | <u>n/a</u>     |
| 33 |                               |     |                                                                                                                                                                                                                                                                                     |                |
| 34 |                               |     |                                                                                                                                                                                                                                                                                     |                |
| 35 | Biological specimens          | 33  | Plans for collection, laboratory evaluation, and storage of biological specimens for genetic or molecular analysis in the current trial and for future use in ancillary studies, if applicable                                                                                      | <u>n/a</u>     |
| 36 |                               |     |                                                                                                                                                                                                                                                                                     |                |
| 37 |                               |     |                                                                                                                                                                                                                                                                                     |                |

\*It is strongly recommended that this checklist be read in conjunction with the SPIRIT 2013 Explanation & Elaboration for important clarification on the items. Amendments to the protocol should be tracked and dated. The SPIRIT checklist is copyrighted by the SPIRIT Group under the Creative Commons "[Attribution-NonCommercial-NoDerivs 3.0 Unported](https://creativecommons.org/licenses/by-nc-nd/3.0/)" license.

# BMJ Open

## Implementation and impact of an online tool used in primary care to improve access to financial benefits for patients: A study protocol

|                                 |                                                                                                                                                                                                                                                                                                                                                                                                                                                                                                                                                                                                                                                                                                                                                                                                                                                                                                                                                                                                                                                                                                                                                                                                                                                        |
|---------------------------------|--------------------------------------------------------------------------------------------------------------------------------------------------------------------------------------------------------------------------------------------------------------------------------------------------------------------------------------------------------------------------------------------------------------------------------------------------------------------------------------------------------------------------------------------------------------------------------------------------------------------------------------------------------------------------------------------------------------------------------------------------------------------------------------------------------------------------------------------------------------------------------------------------------------------------------------------------------------------------------------------------------------------------------------------------------------------------------------------------------------------------------------------------------------------------------------------------------------------------------------------------------|
| Journal:                        | <i>BMJ Open</i>                                                                                                                                                                                                                                                                                                                                                                                                                                                                                                                                                                                                                                                                                                                                                                                                                                                                                                                                                                                                                                                                                                                                                                                                                                        |
| Manuscript ID                   | bmjopen-2017-015947.R2                                                                                                                                                                                                                                                                                                                                                                                                                                                                                                                                                                                                                                                                                                                                                                                                                                                                                                                                                                                                                                                                                                                                                                                                                                 |
| Article Type:                   | Protocol                                                                                                                                                                                                                                                                                                                                                                                                                                                                                                                                                                                                                                                                                                                                                                                                                                                                                                                                                                                                                                                                                                                                                                                                                                               |
| Date Submitted by the Author:   | 25-Jul-2017                                                                                                                                                                                                                                                                                                                                                                                                                                                                                                                                                                                                                                                                                                                                                                                                                                                                                                                                                                                                                                                                                                                                                                                                                                            |
| Complete List of Authors:       | Aery , Anjana; The Wellesley Institute<br>Rucchetto, Anne; St. Michael's Hospital, Centre for Urban Health Solutions, Upstream Lab<br>Singer , Alexander; University of Manitoba College of Medicine, Department of Family Medicine ; Manitoba Primary Care Research Network<br>Halas , Gayle; University of Manitoba College of Medicine, Family Medicine<br>Bloch, Gary; University of Toronto Faculty of Medicine, Family Medicine ; St. Michael's Hospital, Family and Community Medicine<br>Goel, Ritika ; University of Toronto Faculty of Medicine, Family and Community Medicine<br>Raza, Danyaal; University of Toronto Faculty of Medicine, Family and Community Medicine; St. Michael's Hospital, Family and Community Medicine<br>Upshur, Ross E.G; University of Toronto Faculty of Medicine, Family and Community Medicine<br>Bellaire, Jackie; University of Toronto Faculty of Medicine, Family and Community Medicine; South East Toronto Family Health Team<br>Katz, Alan; University of Manitoba, Community Health Sciences; University of Manitoba, Family Medicine<br>Pinto, Andrew; St. Michael's Hospital, Department of Family and Community Medicine; Upstream Lab, Centre for Urban Health Solutions, St. Michael's Hospital |
| <b>Primary Subject Heading</b>: | General practice / Family practice                                                                                                                                                                                                                                                                                                                                                                                                                                                                                                                                                                                                                                                                                                                                                                                                                                                                                                                                                                                                                                                                                                                                                                                                                     |
| Secondary Subject Heading:      | Health services research, Patient-centred medicine, Medical management, Public health                                                                                                                                                                                                                                                                                                                                                                                                                                                                                                                                                                                                                                                                                                                                                                                                                                                                                                                                                                                                                                                                                                                                                                  |
| Keywords:                       | QUALITATIVE RESEARCH, SOCIAL MEDICINE, PREVENTIVE MEDICINE, PRIMARY CARE                                                                                                                                                                                                                                                                                                                                                                                                                                                                                                                                                                                                                                                                                                                                                                                                                                                                                                                                                                                                                                                                                                                                                                               |
|                                 |                                                                                                                                                                                                                                                                                                                                                                                                                                                                                                                                                                                                                                                                                                                                                                                                                                                                                                                                                                                                                                                                                                                                                                                                                                                        |

SCHOLARONE™  
Manuscripts

## Implementation and impact of an online tool used in primary care to improve access to financial benefits for patients: A study protocol

### Author Information:

Anjana Aery<sup>1</sup>, Anne Rucchetto<sup>2</sup>, Alexander Singer<sup>3,4</sup>, Gayle Halas<sup>3</sup>, Gary Bloch<sup>5,6</sup>, Ritika Goel<sup>5,7</sup>, Danyaal Raza<sup>5,6</sup>, Ross E.G. Upshur<sup>5,8,9</sup>, Jackie Bellaire<sup>5,10</sup>, Alan Katz<sup>3,4,11</sup>, Andrew D. Pinto<sup>2,5,6,9\*</sup>

1. Wellesley Institute, Toronto, Ontario, Canada
2. The Upstream Lab, Centre for Urban Health Solutions, Li Ka Shing Knowledge Institute, St. Michael's Hospital, Toronto
3. Department of Family Medicine, Faculty of Medicine, University of Manitoba, Winnipeg
4. Manitoba Primary Care Research Network, Winnipeg
5. Department of Family and Community Medicine, Faculty of Medicine, University of Toronto, Toronto
6. Department of Family and Community Medicine, St. Michael's Hospital, Toronto
7. Central Toronto Community Health Centre, Toronto
8. Lunenfeld-Tanenbaum Research Institute, Sinai Health Systems, Toronto
9. Division of Clinical Public Health, Dalla Lana School of Public Health, University of Toronto, Toronto
10. South East Toronto Family Health Team, Toronto
11. Manitoba Centre for Health Policy, Winnipeg

Anjana Aery [anjanaaery@gmail.com](mailto:anjanaaery@gmail.com)

Anne Rucchetto [rucchettoa@smh.ca](mailto:rucchettoa@smh.ca)

Alex Singer [asinger@sbgh.mb.ca](mailto:asinger@sbgh.mb.ca)

Gayle Halas [gayle.halas@umanitoba.ca](mailto:gayle.halas@umanitoba.ca)

Gary Bloch [gary.bloch@utoronto.ca](mailto:gary.bloch@utoronto.ca)

Ritika Goel [ritikagoelto@gmail.com](mailto:ritikagoelto@gmail.com)

Danyaal Raza [razada@smh.ca](mailto:razada@smh.ca)

Ross Upshur [ross.upshur@utoronto.ca](mailto:ross.upshur@utoronto.ca)

Jackie Bellaire [jackie.bellaire@utoronto.ca](mailto:jackie.bellaire@utoronto.ca)

Alan Katz [alan\\_katz@cpe.umanitoba.ca](mailto:alan_katz@cpe.umanitoba.ca)

Andrew D. Pinto [andrew.pinto@utoronto.ca](mailto:andrew.pinto@utoronto.ca)

*\*corresponding author:*

Dr. Andrew Pinto

Mailing address: 410 Sherbourne Street, 4<sup>th</sup> floor, Toronto, Ontario, Canada M4X 1K2

Phone: 416-867-3728

Preferred email: [andrew.pinto@utoronto.ca](mailto:andrew.pinto@utoronto.ca)

**Word Count: 3,652**

## **Abstract**

### **Objectives**

Addressing the social determinants of health has been identified as crucial to reducing health inequities. However, few evidence-based interventions exist. This study emerges from an ongoing collaboration between physicians, researchers and a financial literacy organization. Our study will answer the following: Is an online tool that improves access to financial benefits feasible and acceptable? Can such a tool be integrated into clinic workflow? What are patient perspectives on the tool and what is the short-term impact on access to benefits?

### **Methods**

An advisory group made up of patients living on low incomes and representatives from community agencies supports this study. We will recruit three primary care sites in Toronto, Ontario and three in Winnipeg, Manitoba that serve low-income communities. We will introduce clinicians to screening for poverty and how benefits can increase income. Health providers will be encouraged to use the tool with any patient seen. The health provider and patient will complete the online tool together, generating a tailored list of benefits and resources to assist with obtaining these benefits. A brief survey on this experience will be administered to patients after they complete the tool, as well as a request to contact them in one month. Those who agree to be contacted will be interviewed on whether the intervention improved access to financial benefits. We will also administer an online survey to providers and conduct focus groups at each site.

### **Ethics and dissemination**

Key ethical concerns include that patients may feel discomfort when being asked about their financial situation, may feel obliged to complete the tool and may have their expectations falsely raised about receiving benefits. Providers will be trained to address each of these concerns. We will share our findings with providers and policymakers interested in addressing the social determinants of health within health care settings.

### **Trial registration:**

Clinicaltrials.gov: [NCT02959866](https://clinicaltrials.gov/ct2/show/study/NCT02959866). Registered Nov 7, 2016. Retrospectively registered.

### **Strengths and Limitations**

- Multi-site study involving clinics in two provinces.
- Pragmatic implementation of a novel tool in the real world of busy primary care clinics.
- Mixed-methods evaluation, using several data sources to triangulate findings.
- Convenience sampling method for patients.
- A short follow-up period (4 weeks after intervention) may underestimate the impact of the novel tool.

**Keywords:** social determinants of health, income, poverty, primary care, health promotion

## BACKGROUND

The World Health Organization defines the social determinants of health (SDOH) as “the conditions in which people are born, grow, live, work and age”, and include the material resources a person has available that are necessary to live a healthy life [1]. SDOH have been identified as a key reason for health inequities between different individuals and groups within a population, and help explain differences in access to health services [2]. The World Health Organization Commission on Social Determinants of Health, the British Medical Association and the Canadian Medical Association have all called on the health sector to play a greater role in addressing the SDOH through implementing and evaluating new interventions and serving as a link between disadvantaged communities and social and community services [3–6]. Primary care settings in particular are uniquely opportune spaces to take action [7]. Primary care providers follow patients longitudinally, are community-based and often have knowledge of the broader familial and social contexts that shape health and disease [8].

One of the most important SDOH is income security: a person’s actual, perceived and expected income [9, 10]. Income influences the presence and severity of most health conditions. People living in poverty may have difficulty paying rent [11], affording nutritious food [12-15], affording transportation and engaging with others socially [6–9]. Many studies have shown that economically marginalized people tend to live shorter lives, experience a greater burden of disease and disability and rate their health status as worse than the wealthy [16–21]. One aspect of income security is access to financial benefits.



1  
2  
3 There are currently few, rigorously evaluated SDOH interventions deployed in clinical settings  
4 that have been found to improve material conditions and subsequently the health of individuals  
5 and families [22, 23]. Welfare benefits advice services within general practices in the United  
6 Kingdom have been found to increase the income of recipients, although improvements in health  
7 were not assessed in most studies [24]. Similarly, a health promotion service in Toronto, Canada  
8 has been developed to assist patients with income security within primary care settings, but the  
9 impact has not yet been reported[25]. Several studies in the United States have demonstrated the  
10 effectiveness of clinic-based interventions at connecting patients to community resources to  
11 address SDOH. In Boston, the Well-child Care Visit, Evaluation, Community Resources,  
12 Advocacy, Referral, Education (WE CARE) study took place in pediatric clinics [26]. A waiting  
13 room survey screened for social needs and members of the health care team provided  
14 information on community resources, adding less than two minutes to the visit. At one month,  
15 20% of the intervention group parents reported contacting a referred community resource versus  
16 2.2% of parents in the control group [27]. The online tool, HelpSteps [28, 29], screens for a  
17 much larger number of social needs, taking on average 25 minutes to complete, with 90% of  
18 users identifying at least one social need and 96% reporting they would recommend its use to a  
19 friend or peer [30]. The California iScreen study[31], also tested in pediatric clinics, used the  
20 Health Leads [32] model and found that social needs can be identified and providing patient  
21 supports led to improvements in parent-reported child health [33]. In Canada, a paper-based  
22 clinical tool has helped train physicians and other health providers to consider poverty as a health  
23 issue [34]. This tool has been adapted by the College of Family Physicians of Canada for use in  
24 all provinces and territories. No studies to date have evaluated the impact of this tool on  
25 providers or patients.  
26  
27  
28  
29  
30  
31  
32  
33  
34  
35  
36  
37  
38  
39  
40  
41  
42  
43  
44  
45  
46  
47  
48  
49  
50  
51  
52  
53  
54  
55  
56  
57  
58  
59  
60

Our study focuses on developing, implementing and evaluating an online tool in primary care settings that focuses on access to financial benefits. This study emerges from an ongoing collaboration between family physicians, researchers and a charitable financial literacy organization, Prosper Canada [35]. This paper describes the protocol for this mixed-methods study that will evaluate the implementation and impact of this online tool. Our study will assess:

- 1) whether health providers find using a tool to address access to financial benefits in a clinical setting feasible and acceptable;
- 2) lessons learned and opportunities identified to integrate the tool within the regular workflow of primary health care organizations;
- 3) feedback from patients using the online tool and the short-term impacts on awareness and access to benefits.

## METHODS/ DESIGN

This study will use qualitative and quantitative methods to evaluate the feasibility and acceptability of using an online tool in primary care to address access to financial benefits. The online income tool will be implemented at six primary care clinics, three in Toronto, Ontario and three in Winnipeg, Manitoba. All sites serve large numbers of patients with complex health needs and low socioeconomic status (Table 1).

*Table 1. Clinic characteristics for 6 primary care sites in Ontario and Manitoba*

| Clinic type | Location | Patient population | Provider(s) who will predominantly | Method of recruiting patients |
|-------------|----------|--------------------|------------------------------------|-------------------------------|
|             |          |                    |                                    |                               |

|                         |                    |                                                                                                                     | <b>administer the tool</b>                               |                                                                                                    |
|-------------------------|--------------------|---------------------------------------------------------------------------------------------------------------------|----------------------------------------------------------|----------------------------------------------------------------------------------------------------|
| Family Health Team      | Toronto, Ontario   | Over 30% of patients live in neighbourhoods that have average incomes in the lowest quintile.                       | Family physicians and nurse practitioner                 | Reception staff provide patients an information sheet or health care providers initiate enrollment |
| Community Health Centre | Toronto, Ontario   | Priority populations include newcomers and patients with substance use or mental health needs                       | Family physician, nurse practitioners and social workers | Health care provider initiated                                                                     |
| Family Health Team      | Toronto, Ontario   | Serves wide range of patients with a focus on the unattached, medically and/or socially complex, high need patients | Family physicians and patient navigator                  | Health care provider initiated                                                                     |
| Community Health        | Winnipeg, Manitoba | Serves one of the most impoverished areas in                                                                        | Family physicians, nurse practitioners,                  | Health care provider                                                                               |

|                         |                           |                                                                                                                                                                                                                                                                     |                                                                                                    |                                       |
|-------------------------|---------------------------|---------------------------------------------------------------------------------------------------------------------------------------------------------------------------------------------------------------------------------------------------------------------|----------------------------------------------------------------------------------------------------|---------------------------------------|
| Centre                  |                           | <p>the city. The neighborhood has an unemployment rate of 17% with 34% of the families living in poverty. There are 83% female lone-parent families and 16.9% of the community are members of a visible minority group with another 29% of Indigenous ancestry.</p> | <p>nurses, social workers, support workers</p>                                                     | <p>initiated</p>                      |
| Community Health Centre | <p>Winnipeg, Manitoba</p> | <p>Serves a diverse inner city community providing a very wide range of services to individuals, families, teens, adults and geriatrics within our geographic community. Special focus for</p>                                                                      | <p>Family physicians, nurse practitioners, nurses, social workers, support workers, counselors</p> | <p>Health care provider initiated</p> |

|                         |                    |                                                                                                                                                          |                                               |                                |
|-------------------------|--------------------|----------------------------------------------------------------------------------------------------------------------------------------------------------|-----------------------------------------------|--------------------------------|
|                         |                    | priority populations of marginalized groups such as immigrants and refugees, transgendered individuals and those living with STIs.                       |                                               |                                |
| Community Health Centre | Winnipeg, Manitoba | Serves a generally low-income north Winnipeg neighborhood. Focus on patients within the catchment area with particular interest in chronic disease care. | Family physicians, nurse practitioner, nurses | Health care provider initiated |

### Intervention

The intervention is centered on an online tool that guides users through 12 demographic and income-related questions and subsequently generates a customized list of relevant provincial and federal government benefits and tax credits. The initial screening question “Do you ever have difficulty making ends meet at the end of the month?” has been validated in similar settings to identify patients who live below the Canadian poverty line with 98% sensitivity and 64% specificity [36]. Further questions were determined based on the eligibility criteria for various federal and provincial benefits and tax credit programs. The tool was first used at a community health centre and with a family health team in Toronto for one month to identify technical

1  
2  
3 problems. Following feedback sessions with providers, modifications were made to the tool to  
4  
5 improve its overall design for use in this study.  
6  
7

### 8 **Study Procedures**

9  
10 An orientation session will be held at each site to introduce primary care providers to the tool  
11  
12 and enroll them in the study as participants. Following this session, the tool will be implemented  
13  
14 for a 3-month period. The tool can be used by any member of the health care team, including  
15  
16 physicians, nurses, nurse practitioners, patient navigators and social workers. Each site will have  
17  
18 some flexibility in how the tool will be implemented into the routine workflow of patient care,  
19  
20 based on input from providers at the site. Health providers will be encouraged to use the tool  
21  
22 with every patient seen. The tool can also be used in an opportunistic way, when patients share a  
23  
24 health concern that is linked to low income. Patients who consent to participate in the study can  
25  
26 then use the tool with their health provider. At this time, study sites do not have a formal,  
27  
28 systematic way to identify low-income patients. To minimize bias by providers or reception  
29  
30 staff, all patients who present for care in these clinics will be approached. This intervention was  
31  
32 not randomized because excluding low-income patients from receiving information on eligible  
33  
34 benefits and accessing additional income supports would be unethical. Moreover, the topic may  
35  
36 come up in any given appointment depending on the nature of the visit. Given the limited time  
37  
38 during appointments at some sites family physicians will screen patients for low income and  
39  
40 refer them to a care coordinator (e.g. social worker) to complete the tool (Figure 1).  
41  
42  
43  
44  
45  
46  
47  
48  
49  
50

### 51 **Figure 1. Implementation and evaluation of an online income tool**

#### 52 53 54 55 **Participants**

### *Providers*

The 6 clinics testing the tool will introduce the pilot study to health care providers and interested providers will be consented to participate. We will aim to have a diverse group of health care professionals use the tool with patients including family physicians, nurse practitioners, social workers and patient navigators.

### *Patients*

All patients seen at the primary care site are eligible to complete the online tool with their provider. Health providers and clinic staff will inform patients of the study through information sheets provided at the front desk of clinics or during an appointment. After reviewing the information sheet, the patient will note that they consent to proceed. To preserve anonymity, signed consent from patients will not be sought. The inclusion criteria for the one month follow-up with patients is as follows: used the tool approximately one month ago with their health care provider, able to provide consent, 18 years old or above, able to converse in English and able to be reached via telephone or email.

### *Sample Size*

The primary aim of this pilot study is to assess the acceptability and feasibility of the intervention in a clinic setting and assess the short-term impact of the tool on patients. There is no pre-defined sample for patients completing the tool with their provider. This pilot study will help determine study sample calculations for future clinical trials and the usage and length of time to complete the tool will be monitored [37]. Of those patients who complete the tool and survey, a subset will be contacted for follow-up. The target sample size for one-month follow-up

1  
2  
3 is 200 patients in each province for a total of 400 patients. We anticipate that this sample size  
4  
5 will be robust enough to determine the acceptability of using the tool, as well as provide data on  
6  
7 impact that will allow for sample size calculation for future studies of the impact of such tools on  
8  
9 income itself.  
10  
11

## 12 13 14 15 Quantitative Data Collection

### 16 17 *Online Tool Output*

18  
19 We will collect a set of data points on each use of the tool. We will not be able to distinguish  
20  
21 repeat users. The tool will record answers to the following demographic questions: age,  
22  
23 immigration status, employment status, whether someone in the household has a disability,  
24  
25 household income and how many people live in the household and any existing benefits or tax  
26  
27 credits received by the patient. The tool will also track clinic site, start time and end time of use,  
28  
29 benefits recommended (output of tool) and proportion of users who complete the tool.  
30  
31  
32  
33  
34  
35

### 36 37 *Patient surveys*

38  
39 At the end of the tool patients will be asked to complete a brief survey on their experience of  
40  
41 using the tool and to provide contact information if interested in being contacted in the future.  
42  
43 This survey will capture whether patients found the tool helpful, whether they would recommend  
44  
45 the tool to a friend or family member and whether they understood the information provided to  
46  
47 them. Lastly, the survey will use a Likert scale for patients to mark their confidence in taking  
48  
49 next steps based on the information provided to them following their initial use of the tool with  
50  
51 providers. Since there are no standardized instruments for evaluating this type of intervention the  
52  
53 research team developed surveys to learn about patient perceptions of the tool after immediate  
54  
55  
56  
57  
58  
59  
60



1  
2  
3 use. At the end of the tool, we will ask patients' permission to have a research coordinator follow  
4  
5 up with them via telephone or email in order to conduct a structured interview one month after  
6  
7 their use of the tool in the clinic. This subset will be a convenience sample of all patients who  
8  
9 provide their contact information and consent to an interview.  
10  
11

## 12 13 14 ***Qualitative Data Collection***

### 15 16 ***Provider focus groups and survey***

17  
18 Three months after participating in the online income tool pilots, providers will be asked to  
19  
20 complete an online, anonymous survey about their experience of using the tool. The purpose of  
21  
22 this survey is to understand the providers' perspective on whether they would use the tool in the  
23  
24 future and whether they would recommend it to a colleague. Surveys will also capture how many  
25  
26 times providers used the tool, whether providers felt they had enough time to do the tool with  
27  
28 their patients, as well as the biggest benefit and drawback of using the tool, respectively.  
29  
30

31  
32 Providers at each site will also participate in a focus group discussion that explores the use of the  
33  
34 tool over the last three months and the barriers and facilitators to implementation. Focus groups  
35  
36 will provide a setting for in-depth discussion around the tool's integration into regular clinic  
37  
38 workflow, suggestions for its improvement, provider attitudes about addressing poverty in  
39  
40 primary care, as well as factors that inhibited use of the tool during piloting at each site. A set of  
41  
42 questions will be used to guide the focus groups and the discussions will be audio-recorded and  
43  
44 transcribed verbatim.  
45  
46  
47  
48  
49

### 50 51 52 ***Provider observations and feedback***

1  
2  
3 During the three month-period of pilot testing the online income tool at three sites in Winnipeg  
4 and Toronto, respectively, the use of the tool and its accompanying feedback from study team  
5 members and participating staff is being collected on an ongoing basis. Analytics regarding the  
6 number of times the tool is being used at each site are recorded and shared with study team  
7 members on a weekly basis and any feedback shared about the tool in informal conversations  
8 during site visits, through email, or interim reports is noted in a feedback matrix that will be used  
9 when developing the tool in preparation for its next phase of use.  
10  
11  
12  
13  
14  
15  
16  
17  
18  
19  
20

## 21 ANALYSIS PLAN

### 22 *Quantitative Analysis*

23  
24  
25 The primary outcome of this study is patient and provider perceptions around the integration of a  
26 tool addressing income in primary care settings (assessed through patient surveys, telephone  
27 interviews with patients at 4 weeks, provider focus groups, and provider surveys). Additional  
28 outcomes that will be measured include patient access to financial benefits 4 weeks after their  
29 use of the tool (assessed through telephone interview at 4 weeks) (Table 2). Descriptive statistics  
30 will be calculated (counts, percentages, means) to summarize variables including patient  
31 characteristics, usage of the tool and patient outcomes for all six sites. Outcome measures will be  
32 dichotomous and a bivariate analysis (using Student t-tests and chi-square tests, as appropriate)  
33 will be performed to determine associations between patient characteristics recorded from the  
34 tool and outcome measures (e.g., whether program was helpful, whether the patient is confident  
35 in taking next steps and whether their financial situation improved). Independent variables  
36 associated with positive patient outcomes and negative patient outcomes will be analyzed  
37  
38  
39  
40  
41  
42  
43  
44  
45  
46  
47  
48  
49  
50  
51  
52  
53  
54  
55  
56  
57  
58  
59  
60

1  
2  
3 separately. Logistic regression analysis will be performed to identify variables independently  
4  
5 associated with patient outcome measures.  
6  
7  
8  
9

### 10 *Qualitative Analysis*

11  
12 A secondary outcome that will be assessed in this study is providers' perspectives on the  
13 feasibility and acceptability of the tool using qualitative analysis. The field notes and transcripts  
14  
15 of the focus groups with providers will be analyzed thematically [38]. An initial coding  
16  
17 framework will be developed using the focus group guide. Two team members will  
18  
19 independently read and code transcripts using Dedoose 7.0.23 (SocioCultural Research  
20  
21 Consultants, Los Angeles, CA). Themes will be refined in an iterative process by comparing  
22  
23 codes with the research team and reaching consensus on a final coding framework. The thematic  
24  
25 analysis will focus on identifying key facilitators and barriers to implementation and provider  
26  
27 perspectives on the impact of the tool and ways to improve similar tools. Field notes collected  
28  
29 throughout the study will help contextualize findings for each site and identify similarities and  
30  
31 differences across sites. Open-ended questions from patient and provider surveys will also be  
32  
33 thematically coded and categorized. We will identify common experiences associated with using  
34  
35 the tool that may provide insight into how the tool works and ways to improve similar tools in  
36  
37 the future.  
38  
39  
40  
41  
42  
43  
44  
45  
46  
47

48 *Table 2 – Main outcome measures for implementation and impact of tool*

| Measure | Source | Method of<br>data<br>collection | Domain | Time point |
|---------|--------|---------------------------------|--------|------------|
|         |        |                                 |        |            |

|                                                                                                       |                                 |          |                                                                                           |               |                               |
|-------------------------------------------------------------------------------------------------------|---------------------------------|----------|-------------------------------------------------------------------------------------------|---------------|-------------------------------|
| 1<br>2<br>3<br>4<br>5<br>6<br>7<br>8<br>9<br>10<br>11<br>12<br>13<br>14<br>15<br>16<br>17<br>18<br>19 | Acceptability of tool           | Provider | Provider<br>focus group<br>and survey,<br>patient<br>survey and<br>telephone<br>interview | Acceptability | After 3 month<br>study period |
| 20<br>21<br>22<br>23<br>24<br>25<br>26<br>27<br>28<br>29<br>30<br>31<br>32<br>33<br>34<br>35          | Feasibility of tool             | Provider | Provider<br>focus group<br>and survey,<br>patient<br>survey and<br>telephone<br>interview | Feasibility   | After 3 month<br>study period |
| 36<br>37<br>38<br>39<br>40<br>41<br>42                                                                | Change in income                | Patient  | Patient<br>follow up<br>interview                                                         | Effectiveness | 1 month                       |
| 43<br>44<br>45<br>46<br>47<br>48<br>49<br>50                                                          | Change in knowledge of benefits | Patient  | Patient<br>follow-up<br>interview                                                         | Effectiveness | 1 month                       |

51  
52  
53  
54  
55  
56  
57  
58  
59  
60

***Advisory group***

1  
2  
3 We will organize an advisory committee made of up patients, community agencies and staff to  
4 provide ongoing feedback on the project. Our aim is to engage 4-6 patients to provide input on  
5 how to improve the online tool and its use in clinical settings. For this study the advisory  
6 committee will play an important role in understanding how to improve the tool interface and  
7 what information will be most useful for patients to improve the tool output. The advisory  
8 committee will meet approximately once a month beginning in July 2016 until the end of data  
9 collection to help interpret findings, make recommendations to the online tool and suggestions  
10 for integrating its use within the care team. Ongoing engagement with patients and stakeholders  
11 will help to determine modifications to the tool, contextualize our findings and promote greater  
12 uptake in the future [39].  
13  
14  
15  
16  
17  
18  
19  
20  
21  
22  
23  
24  
25  
26  
27  
28  
29  
30  
31

## 32 **ETHICS AND DISSEMINATION**

33  
34 This study has been approved by St. Michael's Hospital Research Ethics Board, the Health  
35 Research Ethics Board at the University of Manitoba, and the Michael Garron Hospital Research  
36 Ethics Board. Informed consent will be obtained for all study participants. Data collected by the  
37 online tool will be anonymous, with no link between answers to questions in the tool and  
38 personal identifying data. Some patients may feel discomfort when asked the screening question  
39 and they may feel shame or fear stigma if they are experiencing income insecurity. We will  
40 attempt to lessen this possibility by encouraging health providers to normalize the experience for  
41 patients, e.g., "I'm asking many of my patients this question over the next 3 months". Patients  
42 may feel obligated to complete the tool with their healthcare providers. During training sessions,  
43 all providers will be asked to emphasize that this intervention is optional and not part of routine  
44  
45  
46  
47  
48  
49  
50  
51  
52  
53  
54  
55  
56  
57  
58  
59  
60

1  
2  
3 care. Patients will also be informed that they can stop using the tool at any time. Healthcare  
4  
5 providers will also be trained to manage patient expectations by stating that this tool may or may  
6  
7 not identify benefits which could provide increased income. All patient and provider surveys will  
8  
9 be anonymized. Finally, participants in focus groups will not be identified by name and all  
10  
11 transcripts will be anonymized during transcription.  
12  
13  
14

15  
16  
17 This study uses an “upstream” approach to address a root cause of poor health outcomes:  
18  
19 poverty. By exploring the feasibility and acceptability of using an online tool we can establish a  
20  
21 standardized process to screen patients for low income in routine primary care settings. We will  
22  
23 also examine and report on local factors that influence implementation at the different clinic  
24  
25 sites. Moreover, the implementation of the tool will be pragmatic, with the ultimate aim to bring  
26  
27 such tools into broader practice through integration into primary healthcare settings. The findings  
28  
29 from this study will provide insight into individual-level interventions to address the social  
30  
31 determinants of health in primary care. Such tools may be useful to a diversity of primary care  
32  
33 providers and could be applicable to other health care settings, such as in discharge planning at  
34  
35 health care institutions. Important strengths of the intervention include opportunities for  
36  
37 providers to offer feedback on the content, design and overall usability of the tool and the  
38  
39 follow-up with patients about changes in their financial situation. Patients and community  
40  
41 agencies represented in the advisory group will help ensure that this study remains focused on  
42  
43 patient-centred outcomes and experiences and will contribute particular perspectives to the  
44  
45 interpretation of our findings.  
46  
47  
48  
49  
50  
51  
52  
53  
54  
55  
56  
57  
58  
59  
60

1  
2  
3 We will evaluate the implementation and short-term effects of this online income security tool  
4 within six health clinics. We will attempt to engage a broad representation of health providers at  
5 each site and will invite all staff to participate in our study. The information provided in the  
6 output of the tool may not be suitably tailored to the needs of all individuals. The time frame of  
7 this study does not permit us to examine health effects, which we would anticipate would take  
8 longer than one month to develop, and which would require a more intense intervention. Future  
9 research could examine whether using this tool, in coordination with other services, with patients  
10 identified as being at risk of developing complex health and social needs could impact on health  
11 and health service use [2, 40]. The hypothesis tested would be that that addressing income  
12 security may reduce the risk of poor health and high service use for some patients.  
13  
14  
15  
16  
17  
18  
19  
20  
21  
22  
23  
24  
25  
26  
27  
28

29 There are several limitations to the proposed the study. First, the study uses a convenience  
30 sampling method so participants who declined to use tool or could not be reached at follow up  
31 were not captured. Second, the sites chosen to pilot the tool were already interested in addressing  
32 income security at their clinics. Furthermore, all site materials were in English so findings may  
33 not be generalizable to other clinic settings. Lastly, while we anticipate that the tool will be able  
34 to identify benefits that a patient could be eligible for, the complex process of applying for  
35 benefits may be a barrier to improving income security and a 1 month follow-up may be too  
36 short of a time frame within which to assess impact. However, this is one of the few studies on  
37 SDOH interventions that follows up with patients and a major strength is implementing the tool  
38 across multiple sites in two provinces.  
39  
40  
41  
42  
43  
44  
45  
46  
47  
48  
49  
50  
51  
52  
53  
54  
55  
56  
57  
58  
59  
60

1  
2  
3 This study is timely as awareness and a commitment to act on the SDOH is growing within the  
4 health sector in Canada [6, 22, 41, 42] and globally [43–45]. Continuing medical education  
5 events on poverty and health have been established and new medical school curricula is being  
6 created[46]. These efforts may begin to change medical practice. Yet, there are few studies that  
7 have evaluated the implementation and impact of such initiatives. The findings of this study will  
8 contribute to the design of SDOH interventions in health care, particularly when consider the  
9 role of technology and the practical challenges of incorporating interventions into busy health  
10 organizations.  
11  
12  
13  
14  
15  
16  
17  
18  
19  
20  
21  
22  
23  
24  
25  
26  
27  
28  
29  
30  
31  
32  
33  
34  
35  
36  
37  
38  
39  
40  
41  
42  
43  
44  
45  
46  
47  
48  
49  
50  
51  
52  
53  
54  
55  
56  
57  
58  
59  
60



### **List of abbreviations**

SDOH social determinants of health

WE CARE Well-child Care Visit, Evaluation, Community Resources, Advocacy, Referral,  
Education

### **Declarations**

#### **Ethics approval and consent to participate**

This study was approved by the St. Michael's Hospital Research Ethics Board (15-353), the Health Research Ethics Board at the University of Manitoba (HS19275:H2016:019) and the Michael Garron Hospital Research Ethics Board (691-1608-Mis-298).

#### **Consent for publication**

Not applicable.

#### **Availability of data and material**

The datasets generated and analyzed during the current study are not publicly available due to the requirements of the various Research Ethics Boards, but are available from the corresponding author on reasonable request.

#### **Competing interests**

1  
2  
3 The authors declare that they have no competing interests.  
4  
5  
6  
7

## 8 **Funding**

9  
10 This study was supported by the Canadian Institutes of Health Research (FRN: 142877), Intuit  
11 Foundation, Research Manitoba and the St. Michael's Hospital Foundation. None of the funders  
12 played any role in the design of the study, data collection, data analysis, interpretation of data or  
13 in writing or editing this manuscript.  
14  
15  
16  
17  
18  
19

## 20 **Authors' contributions**

21  
22 ADP conceived the study. AS, GH, GB, RG, DR, REG, AK and ADP provided key inputs into  
23 the design of the study and refinements of the protocol. AA, AR and ADP assisted in the writing  
24 of the first draft of the manuscript. ADP, AS, GH, GB, RG, REG and AK assisted with obtaining  
25 funding for the study. AA, AR, AS, GH, GB, RG, DR, REG, JB, AK and ADP contributed to  
26 critical revisions and editing the manuscript for important intellectual content and approved the  
27 final manuscript. ADP had full access to all the information present and takes responsibility for  
28 the accuracy of this paper.  
29  
30  
31  
32  
33  
34  
35  
36  
37  
38  
39  
40  
41  
42

## 43 **Acknowledgements**

44  
45 We gratefully acknowledge all our collaborators at Prosper Canada, particularly Adam Fair,  
46 Marlene Chiarotto and Layla Rich, without whom this work would not be possible. We also  
47 acknowledge the input of our Income and Health Advisory Group members.  
48  
49  
50  
51  
52  
53  
54  
55  
56  
57  
58  
59  
60

## References

1. World Health Organization. Commission on Social Determinants of Health. Closing the gap in a generation. Geneva, 2008.
2. Rosella LC, Fitzpatrick T, Wodchis WP, Calzavara A, Manson H, Goel V. High-cost health care users in Ontario, Canada: demographic, socio-economic, and health status characteristics. *BMC Health Serv Res.* 2014;14:532. doi:10.1186/s12913-014-0532-2.
3. Baum FE, Legge DG, Freeman T, Lawless A, Labonté R, Jolley GM. The potential for multi-disciplinary primary health care services to take action on the social determinants of health: actions and constraints. *BMC Public Health.* 2013;13:1–13. <http://dx.doi.org/10.1186/1471-2458-13-460>.
4. Maeseneer J, Willems S, De Sutter A, Van de Geuchte I, Billings M. Primary health care as a strategy for achieving equitable care: a literature review commissioned by the Health Systems Knowledge Network. 2007. [www.who.int/social\\_determinants/resources/csdh\\_media/primary\\_health\\_care\\_2007\\_en.pdf](http://www.who.int/social_determinants/resources/csdh_media/primary_health_care_2007_en.pdf).
5. British Medical Association. Social determinants of health - what doctors can do. 2011.
6. Canadian Medical Association. Physicians and health equity: opportunities in practice. 2013.
7. Hassan A, Scherer EA, Pikcinglis A, Krull E, McNickles L, Marmon G, et al. Improving Social Determinants of Health: Effectiveness of a Web-Based Intervention. *Am J Prev Med.* 2015;49:822–31. doi:10.1016/j.amepre.2015.04.023.
8. Kiran T, Pinto AD. Swimming “upstream” to tackle the social determinants of health. *BMJ Qual Saf.* 2016;25 January:138–140.
9. Adler N, Ostrove J. Socioeconomic status and health : what we know and what we don't . *PubMed Commons. Ann N Y Acad Sci.* 1999;896:3–15.

10. Adler NE, Stewart J. Health disparities across the lifespan: Meaning, methods, and mechanisms. *Ann N Y Acad Sci.* 2010;1186:5–23.
11. Hwang SW. Homelessness and health. *Can Med Assoc J.* 2001;164:229–33.
12. Tarasuk V, Cheng J, de Oliveria C, Dachner N, Gunderson C, Kurdyak P. Association between household food insecurity and annual health care costs. *Can Med Assoc J.* 2015;;1–8.
13. Kennedy G. Food for all. *Can Med Assoc J.* 2007;177:1473.
14. Vozoris NT, Tarasuk VS. Household food insufficiency is associated with poorer health. *J Nutr.* 2003;133:120–6.
15. Che J, Chen J. Food insecurity in Canadian households. *Health Reports (Statistics Canada)* 2001;12:11–22.
16. Bartley M, Blane D, Davey Smith G. Introduction: Beyond the Black Report. *Sociol Health Illn.* 1998;20:563–77. doi:10.1111/1467-9566.00119.
17. Marmot M, Wilkinson RG. Psychosocial and material pathways in the relation between income and health: a response to Lynch et al. *BMJ.* 2001;322:1233–6.
18. Ferrie JE, Shipley MJ, Davey Smith G, Stansfeld SA, Marmot MG. Change in health inequalities among British civil servants: the Whitehall II study. *J Epidemiol Community Health.* 2002;56:922–6.
19. Marmot MG, Shipley MJ. Do socioeconomic differences in mortality persist after retirement? 25 year follow up of civil servants from the first Whitehall study. *BMJ.* 1996;313:1177–80.
20. Acheson D. The Acheson Report. In: Purdy, M. Banks D, editor. *The sociology and politics of health: A reader.* London: Routledge; 2001. p. 111–22.
21. Wilkinson RG, Pickett KE. Income inequality and population health: A review and

- 1  
2  
3 explanation of the evidence. *Social Science and Medicine*. 2006;62:1768–84.  
4  
5  
6 22. Buchman S. Screening for poverty in family practice. *Can Fam Physician*. 2012;58:709.  
7  
8  
9 23. Andermann A. Taking action on the social determinants of health in clinical practice: a  
10 framework for health professionals. *Can Med Assoc J*. 2016.  
11  
12  
13 24. Adams J, White M, Moffatt S, Howel D, Mackintosh J. A systematic review of the health,  
14 social and financial impacts of welfare rights advice delivered in healthcare settings. *BMC*  
15 *Public Health*. 2006;6:81. doi:10.1186/1471-2458-6-81.  
16  
17  
18  
19 25. Jones MK, Bloch G, Pinto AD. A novel income security intervention to address poverty in a  
20 primary care setting: a retrospective chart review. *BMJ Open*. 2017;7:e014270.  
21  
22  
23  
24  
25  
26  
27  
28  
29  
30  
31  
32  
33  
34  
35  
36  
37  
38  
39  
40  
41  
42  
43  
44  
45  
46  
47  
48  
49  
50  
51  
52  
53  
54  
55  
56  
57  
58  
59  
60
26. Garg A, Toy S, Tripodis Y, Silverstein M, Freeman E. Addressing social determinants of health at well child care visits: a cluster RCT. *Pediatrics*. 2015;135:e296-304. doi:10.1542/peds.2014-2888.
27. Garg A, Butz AM, Dworkin PH, Lewis RA, Thompson RE, Serwint JR. Improving the management of family psychosocial problems at low-income children's well-child care visits: the WE CARE Project. *Pediatrics*. 2007;120:547–58.
28. Boston Children's Hospital. HelpSteps. 2016. <http://www.helpsteps.com>. Accessed 10 Jun 2016.
29. Fleegler EW, Lieu TA, Wise PH, Muret-Wagstaff S. Families' Health-Related Social Problems and Missed Referral Opportunities. *Pediatrics*. 2007;119:e1332–41. doi:10.1542/peds.2006-1505.
30. Wylie S a, Hassan A, Krull EG, Pikcinglis AB, Corliss HL, Woods ER, et al. Assessing and referring adolescents' health-related social problems: qualitative evaluation of a novel web-based

- 1  
2  
3 approach. *J Telemed Telecare*. 2012;18:392–8. doi:10.1258/jtt.2012.120214.  
4  
5  
6 31. Gottlieb L, Hessler D, Long D, Amaya A, Adler N. A Randomized Trial on Screening for  
7  
8 Social Determinants of Health: the iScreen Study. *Pediatrics*. 2014;134. doi:10.1542/peds.2014-  
9  
10 1439.  
11  
12 32. Berkowitz SA, Hulberg AC, Standish S, Reznor G, Atlas SJ. Addressing unmet basic  
13  
14 resource needs as part of chronic cardiometabolic disease management. *JAMA Int Medicine*  
15  
16 2017; 177 (2): 244-252.  
17  
18  
19 33. Gottlieb LM, Hessler D, Long D, Laves E, Burns AR, Amaya A, et al. Effects of Social  
20  
21 Needs Screening and In-Person Service Navigation on Child Health. *JAMA Pediatr*.  
22  
23 2016;124:e162521. doi:10.1001/jamapediatrics.2016.2521.  
24  
25  
26 34. Bloch G. Poverty: A clinical tool for primary care in Ontario.  
27  
28 <http://effectivepractice.org/resources/poverty-a-clinical-tool-for-primary-care/>. Accessed 12 Jun  
29  
30 2016.  
31  
32  
33 35. Prosper Canada. 2016. <http://prospercanada.org/About-Us/Overview.aspx>. Accessed 10 Jun  
34  
35 2016.  
36  
37  
38 36. Brcic V, Eberdt C, Kaczorowski J. Development of a tool to identify poverty in a family  
39  
40 practice setting: a pilot study. *International journal of family medicine*. 2011;2011.  
41  
42  
43 37. Thabane L, Ma J, Chu R, Cheng J, Ismaila A, Rios LP, et al. A tutorial on pilot studies: the  
44  
45 what, why and how. *BMC Med Res Methodol*. 2010;10:1.  
46  
47  
48 38. Braun V, Clarke V. Using thematic analysis in psychology. *Qual Res Psychol*. 2006;3 May  
49  
50 2015:77–101.  
51  
52  
53 39. Ayala GX, Elder JP. Qualitative methods to ensure acceptability of behavioral and social  
54  
55 interventions to the target population. *J Public Health Dent*. 2011;71 SUPPL. 1:1–17.  
56  
57  
58  
59  
60

- 1  
2  
3 40. Fitzpatrick T, Rosella LC, Calzavara A, Petch J, Pinto AD, Manson H, et al. Looking Beyond  
4  
5 Income and Education. *Am J Prev Med*. 2015;:1–11. doi:10.1016/j.amepre.2015.02.018.  
6  
7  
8 41. Canadian College of Family Physicians. Best advice - Social determinants of health. 2015.  
9  
10 42. Pinto AD, Glattstein-Young G, Mohamed A, Bloch G, Leung F-H, Glazier RH. Building a  
11  
12 Foundation to Reduce Health Inequities: Routine Collection of Sociodemographic Data in  
13  
14 Primary Care. *J Am Board Fam Med*. 2016;29:348–55. doi:10.3122/jabfm.2016.03.150280.  
15  
16  
17 43. Gottlieb L, Sandel M, Adler NE. Collecting and applying data on social determinants of  
18  
19 health in health care settings. *JAMA Internal Medicine*. 2013;173:1017–20.  
20  
21  
22 <http://dx.doi.org/10.1001/jamainternmed.2013.560>.  
23  
24  
25 44. Gottlieb LM, Tirozzi KJ, Manchanda R, Burns AR, Sandel MT. Moving electronic medical  
26  
27 records upstream: Incorporating social determinants of health. *American Journal of Preventive*  
28  
29 *Medicine*. 2015;48:215–8. doi:10.1016/j.amepre.2014.07.009.  
30  
31  
32 45. Garg A, Dworkin PH. Surveillance and Screening for Social Determinants of Health: The  
33  
34 Medical Home and Beyond. *JAMA Pediatr*. 2016;170:189--90.  
35  
36  
37 46. Ontario College of Family Physicians. Primary care interventions in poverty. 2016.  
38  
39 <http://ocfp.on.ca/cpd/povertytool>. Accessed 7 Nov 2016.  
40  
41  
42  
43  
44  
45  
46  
47  
48  
49  
50  
51  
52  
53  
54  
55  
56  
57  
58  
59  
60

Figure 1. Implementation and evaluation of an online income tool



231x252mm (300 x 300 DPI)







## Introduction

|                          |    |                                                                                                                                                                                                           |              |
|--------------------------|----|-----------------------------------------------------------------------------------------------------------------------------------------------------------------------------------------------------------|--------------|
| Background and rationale | 6a | Description of research question and justification for undertaking the trial, including summary of relevant studies (published and unpublished) examining benefits and harms for each intervention        | <u>p.4-6</u> |
|                          | 6b | Explanation for choice of comparators                                                                                                                                                                     | <u>n/a</u>   |
| Objectives               | 7  | Specific objectives or hypotheses                                                                                                                                                                         | <u>p.5-6</u> |
| Trial design             | 8  | Description of trial design including type of trial (eg, parallel group, crossover, factorial, single group), allocation ratio, and framework (eg, superiority, equivalence, noninferiority, exploratory) | <u>p.6</u>   |

## Methods: Participants, interventions, and outcomes

|                      |     |                                                                                                                                                                                                                                                                                                                                                                                |                       |
|----------------------|-----|--------------------------------------------------------------------------------------------------------------------------------------------------------------------------------------------------------------------------------------------------------------------------------------------------------------------------------------------------------------------------------|-----------------------|
| Study setting        | 9   | Description of study settings (eg, community clinic, academic hospital) and list of countries where data will be collected. Reference to where list of study sites can be obtained                                                                                                                                                                                             | <u>p.6-9</u>          |
| Eligibility criteria | 10  | Inclusion and exclusion criteria for participants. If applicable, eligibility criteria for study centres and individuals who will perform the interventions (eg, surgeons, psychotherapists)                                                                                                                                                                                   | <u>p.11</u>           |
| Interventions        | 11a | Interventions for each group with sufficient detail to allow replication, including how and when they will be administered                                                                                                                                                                                                                                                     | <u>p.9-10</u>         |
|                      | 11b | Criteria for discontinuing or modifying allocated interventions for a given trial participant (eg, drug dose change in response to harms, participant request, or improving/worsening disease)                                                                                                                                                                                 | <u>n/a</u>            |
|                      | 11c | Strategies to improve adherence to intervention protocols, and any procedures for monitoring adherence (eg, drug tablet return, laboratory tests)                                                                                                                                                                                                                              | <u>n/a</u>            |
|                      | 11d | Relevant concomitant care and interventions that are permitted or prohibited during the trial                                                                                                                                                                                                                                                                                  | <u>n/a</u>            |
| Outcomes             | 12  | Primary, secondary, and other outcomes, including the specific measurement variable (eg, systolic blood pressure), analysis metric (eg, change from baseline, final value, time to event), method of aggregation (eg, median, proportion), and time point for each outcome. Explanation of the clinical relevance of chosen efficacy and harm outcomes is strongly recommended | <u>p.14-15</u>        |
| Participant timeline | 13  | Time schedule of enrolment, interventions (including any run-ins and washouts), assessments, and visits for participants. A schematic diagram is highly recommended (see Figure)                                                                                                                                                                                               | <u>p.10-11, Fig 1</u> |

1  
2  
3 Sample size 14 Estimated number of participants needed to achieve study objectives and how it was determined, including n/a  
4 clinical and statistical assumptions supporting any sample size calculations

5  
6 Recruitment 15 Strategies for achieving adequate participant enrolment to reach target sample size n/a  
7

8 **Methods: Assignment of interventions (for controlled trials)**  
9

10 Allocation:

11  
12 Sequence generation 16a Method of generating the allocation sequence (eg, computer-generated random numbers), and list of any n/a  
13 factors for stratification. To reduce predictability of a random sequence, details of any planned restriction  
14 (eg, blocking) should be provided in a separate document that is unavailable to those who enrol participants  
15 or assign interventions

16  
17 Allocation concealment mechanism 16b Mechanism of implementing the allocation sequence (eg, central telephone; sequentially numbered, n/a  
18 opaque, sealed envelopes), describing any steps to conceal the sequence until interventions are assigned  
19

20 Implementation 16c Who will generate the allocation sequence, who will enrol participants, and who will assign participants to n/a  
21 interventions

22 Blinding (masking) 17a Who will be blinded after assignment to interventions (eg, trial participants, care providers, outcome n/a  
23 assessors, data analysts), and how  
24

25  
26 17b If blinded, circumstances under which unblinding is permissible, and procedure for revealing a participant's n/a  
27 allocated intervention during the trial  
28  
29  
30  
31

32 **Methods: Data collection, management, and analysis**  
33

34 Data collection methods 18a Plans for assessment and collection of outcome, baseline, and other trial data, including any related p. 11-12  
35 processes to promote data quality (eg, duplicate measurements, training of assessors) and a description of  
36 study instruments (eg, questionnaires, laboratory tests) along with their reliability and validity, if known.  
37 Reference to where data collection forms can be found, if not in the protocol  
38

39 18b Plans to promote participant retention and complete follow-up, including list of any outcome data to be p. 10-11  
40 collected for participants who discontinue or deviate from intervention protocols  
41  
42  
43  
44  
45

|    |                                 |     |                                                                                                                                                                                                                                                                                                                                       |                 |
|----|---------------------------------|-----|---------------------------------------------------------------------------------------------------------------------------------------------------------------------------------------------------------------------------------------------------------------------------------------------------------------------------------------|-----------------|
| 1  |                                 |     |                                                                                                                                                                                                                                                                                                                                       |                 |
| 2  |                                 |     |                                                                                                                                                                                                                                                                                                                                       |                 |
| 3  | Data management                 | 19  | Plans for data entry, coding, security, and storage, including any related processes to promote data quality (eg, double data entry; range checks for data values). Reference to where details of data management procedures can be found, if not in the protocol                                                                     | <u>p. 11-12</u> |
| 4  |                                 |     |                                                                                                                                                                                                                                                                                                                                       |                 |
| 5  |                                 |     |                                                                                                                                                                                                                                                                                                                                       |                 |
| 6  |                                 |     |                                                                                                                                                                                                                                                                                                                                       |                 |
| 7  | Statistical methods             | 20a | Statistical methods for analysing primary and secondary outcomes. Reference to where other details of the statistical analysis plan can be found, if not in the protocol                                                                                                                                                              | <u>p. 13-15</u> |
| 8  |                                 |     |                                                                                                                                                                                                                                                                                                                                       |                 |
| 9  |                                 |     |                                                                                                                                                                                                                                                                                                                                       |                 |
| 10 |                                 | 20b | Methods for any additional analyses (eg, subgroup and adjusted analyses)                                                                                                                                                                                                                                                              | <u>n/a</u>      |
| 11 |                                 |     |                                                                                                                                                                                                                                                                                                                                       |                 |
| 12 |                                 | 20c | Definition of analysis population relating to protocol non-adherence (eg, as randomised analysis), and any statistical methods to handle missing data (eg, multiple imputation)                                                                                                                                                       | <u>n/a</u>      |
| 13 |                                 |     |                                                                                                                                                                                                                                                                                                                                       |                 |
| 14 |                                 |     |                                                                                                                                                                                                                                                                                                                                       |                 |
| 15 |                                 |     |                                                                                                                                                                                                                                                                                                                                       |                 |
| 16 | <b>Methods: Monitoring</b>      |     |                                                                                                                                                                                                                                                                                                                                       |                 |
| 17 |                                 |     |                                                                                                                                                                                                                                                                                                                                       |                 |
| 18 | Data monitoring                 | 21a | Composition of data monitoring committee (DMC); summary of its role and reporting structure; statement of whether it is independent from the sponsor and competing interests; and reference to where further details about its charter can be found, if not in the protocol. Alternatively, an explanation of why a DMC is not needed | <u>n/a</u>      |
| 19 |                                 |     |                                                                                                                                                                                                                                                                                                                                       |                 |
| 20 |                                 |     |                                                                                                                                                                                                                                                                                                                                       |                 |
| 21 |                                 |     |                                                                                                                                                                                                                                                                                                                                       |                 |
| 22 |                                 |     |                                                                                                                                                                                                                                                                                                                                       |                 |
| 23 |                                 | 21b | Description of any interim analyses and stopping guidelines, including who will have access to these interim results and make the final decision to terminate the trial                                                                                                                                                               | <u>n/a</u>      |
| 24 |                                 |     |                                                                                                                                                                                                                                                                                                                                       |                 |
| 25 |                                 |     |                                                                                                                                                                                                                                                                                                                                       |                 |
| 26 | Harms                           | 22  | Plans for collecting, assessing, reporting, and managing solicited and spontaneously reported adverse events and other unintended effects of trial interventions or trial conduct                                                                                                                                                     | <u>n/a</u>      |
| 27 |                                 |     |                                                                                                                                                                                                                                                                                                                                       |                 |
| 28 |                                 |     |                                                                                                                                                                                                                                                                                                                                       |                 |
| 29 | Auditing                        | 23  | Frequency and procedures for auditing trial conduct, if any, and whether the process will be independent from investigators and the sponsor                                                                                                                                                                                           | <u>n/a</u>      |
| 30 |                                 |     |                                                                                                                                                                                                                                                                                                                                       |                 |
| 31 |                                 |     |                                                                                                                                                                                                                                                                                                                                       |                 |
| 32 |                                 |     |                                                                                                                                                                                                                                                                                                                                       |                 |
| 33 | <b>Ethics and dissemination</b> |     |                                                                                                                                                                                                                                                                                                                                       |                 |
| 34 |                                 |     |                                                                                                                                                                                                                                                                                                                                       |                 |
| 35 | Research ethics approval        | 24  | Plans for seeking research ethics committee/institutional review board (REC/IRB) approval                                                                                                                                                                                                                                             | <u>p.15</u>     |
| 36 |                                 |     |                                                                                                                                                                                                                                                                                                                                       |                 |
| 37 |                                 |     |                                                                                                                                                                                                                                                                                                                                       |                 |
| 38 | Protocol amendments             | 25  | Plans for communicating important protocol modifications (eg, changes to eligibility criteria, outcomes, analyses) to relevant parties (eg, investigators, REC/IRBs, trial participants, trial registries, journals, regulators)                                                                                                      | <u>n/a</u>      |
| 39 |                                 |     |                                                                                                                                                                                                                                                                                                                                       |                 |
| 40 |                                 |     |                                                                                                                                                                                                                                                                                                                                       |                 |
| 41 |                                 |     |                                                                                                                                                                                                                                                                                                                                       |                 |
| 42 |                                 |     |                                                                                                                                                                                                                                                                                                                                       |                 |
| 43 |                                 |     |                                                                                                                                                                                                                                                                                                                                       |                 |
| 44 |                                 |     |                                                                                                                                                                                                                                                                                                                                       |                 |
| 45 |                                 |     |                                                                                                                                                                                                                                                                                                                                       |                 |
| 46 |                                 |     |                                                                                                                                                                                                                                                                                                                                       |                 |
| 47 |                                 |     |                                                                                                                                                                                                                                                                                                                                       |                 |
| 48 |                                 |     |                                                                                                                                                                                                                                                                                                                                       |                 |
| 49 |                                 |     |                                                                                                                                                                                                                                                                                                                                       |                 |

|    |                               |     |                                                                                                                                                                                                                                                                                     |                |
|----|-------------------------------|-----|-------------------------------------------------------------------------------------------------------------------------------------------------------------------------------------------------------------------------------------------------------------------------------------|----------------|
| 1  |                               |     |                                                                                                                                                                                                                                                                                     |                |
| 2  |                               |     |                                                                                                                                                                                                                                                                                     |                |
| 3  | Consent or assent             | 26a | Who will obtain informed consent or assent from potential trial participants or authorised surrogates, and how (see Item 32)                                                                                                                                                        | <u>p.15</u>    |
| 4  |                               |     |                                                                                                                                                                                                                                                                                     |                |
| 5  |                               |     |                                                                                                                                                                                                                                                                                     |                |
| 6  |                               | 26b | Additional consent provisions for collection and use of participant data and biological specimens in ancillary studies, if applicable                                                                                                                                               | <u>n/a</u>     |
| 7  |                               |     |                                                                                                                                                                                                                                                                                     |                |
| 8  |                               |     |                                                                                                                                                                                                                                                                                     |                |
| 9  | Confidentiality               | 27  | How personal information about potential and enrolled participants will be collected, shared, and maintained in order to protect confidentiality before, during, and after the trial                                                                                                | <u>p.15</u>    |
| 10 |                               |     |                                                                                                                                                                                                                                                                                     |                |
| 11 |                               |     |                                                                                                                                                                                                                                                                                     |                |
| 12 | Declaration of interests      | 28  | Financial and other competing interests for principal investigators for the overall trial and each study site                                                                                                                                                                       | <u>p.18-19</u> |
| 13 |                               |     |                                                                                                                                                                                                                                                                                     |                |
| 14 |                               |     |                                                                                                                                                                                                                                                                                     |                |
| 15 | Access to data                | 29  | Statement of who will have access to the final trial dataset, and disclosure of contractual agreements that limit such access for investigators                                                                                                                                     | <u>n/a</u>     |
| 16 |                               |     |                                                                                                                                                                                                                                                                                     |                |
| 17 |                               |     |                                                                                                                                                                                                                                                                                     |                |
| 18 | Ancillary and post-trial care | 30  | Provisions, if any, for ancillary and post-trial care, and for compensation to those who suffer harm from trial participation                                                                                                                                                       | <u>n/a</u>     |
| 19 |                               |     |                                                                                                                                                                                                                                                                                     |                |
| 20 |                               |     |                                                                                                                                                                                                                                                                                     |                |
| 21 | Dissemination policy          | 31a | Plans for investigators and sponsor to communicate trial results to participants, healthcare professionals, the public, and other relevant groups (eg, via publication, reporting in results databases, or other data sharing arrangements), including any publication restrictions | <u>p.17</u>    |
| 22 |                               |     |                                                                                                                                                                                                                                                                                     |                |
| 23 |                               |     |                                                                                                                                                                                                                                                                                     |                |
| 24 |                               |     |                                                                                                                                                                                                                                                                                     |                |
| 25 |                               |     |                                                                                                                                                                                                                                                                                     |                |
| 26 |                               | 31b | Authorship eligibility guidelines and any intended use of professional writers                                                                                                                                                                                                      | <u>n/a</u>     |
| 27 |                               |     |                                                                                                                                                                                                                                                                                     |                |
| 28 |                               | 31c | Plans, if any, for granting public access to the full protocol, participant-level dataset, and statistical code                                                                                                                                                                     | <u>n/a</u>     |
| 29 |                               |     |                                                                                                                                                                                                                                                                                     |                |
| 30 | <b>Appendices</b>             |     |                                                                                                                                                                                                                                                                                     |                |
| 31 |                               |     |                                                                                                                                                                                                                                                                                     |                |
| 32 | Informed consent materials    | 32  | Model consent form and other related documentation given to participants and authorised surrogates                                                                                                                                                                                  | <u>n/a</u>     |
| 33 |                               |     |                                                                                                                                                                                                                                                                                     |                |
| 34 |                               |     |                                                                                                                                                                                                                                                                                     |                |
| 35 | Biological specimens          | 33  | Plans for collection, laboratory evaluation, and storage of biological specimens for genetic or molecular analysis in the current trial and for future use in ancillary studies, if applicable                                                                                      | <u>n/a</u>     |
| 36 |                               |     |                                                                                                                                                                                                                                                                                     |                |
| 37 |                               |     |                                                                                                                                                                                                                                                                                     |                |

38 \*It is strongly recommended that this checklist be read in conjunction with the SPIRIT 2013 Explanation & Elaboration for important clarification on the items.  
 39 Amendments to the protocol should be tracked and dated. The SPIRIT checklist is copyrighted by the SPIRIT Group under the Creative Commons  
 40 "[Attribution-NonCommercial-NoDerivs 3.0 Unported](https://creativecommons.org/licenses/by-nc-nd/3.0/)" license.  
 41
